# From Source to Sink: Petrogenesis of Cretaceous Anatectic Granites from the Fosdick Migmatite–Granite Complex, West Antarctica

C. R. Brown<sup>1</sup>, C. Yakymchuk<sup>1,2\*</sup>, M. Brown<sup>1</sup>, C. M. Fanning<sup>3</sup>,  
F. J. Korhonen<sup>4</sup>, P. M. Piccoli<sup>1</sup> and C. S. Siddoway<sup>5</sup>

<sup>1</sup>Laboratory for Crustal Petrology, Department of Geology, University of Maryland, College Park, MD 20742, USA;

<sup>2</sup>Department of Earth and Environmental Sciences, University of Waterloo, Waterloo, ON, N2L 3G1, Canada;

<sup>3</sup>Research School of Earth Sciences, The Australian National University, Mills Road, Canberra, ACT 0200,

Australia; <sup>4</sup>Geological Survey of Western Australia, East Perth, WA 6004, Australia; <sup>5</sup>Department of Geology,

The Colorado College, Colorado Springs, CO 80903, USA

\*Corresponding author. Telephone: +1 519 888 4567 (x33763). E-mail: cyakymchuk@uwaterloo.ca

Received June 23, 2014; Accepted June 14, 2016

## ABSTRACT

Anatectic granites from the Fosdick migmatite–granite complex yield U–Pb zircon crystallization ages that range from 115 to 100 Ma, with a dominant grouping at 107–100 Ma, which corresponds to the timing of dome formation during the regional oblique extension that facilitated exhumation of the complex. The occurrence of leucosome-bearing normal-sense shear zones in migmatitic gneisses indicates that suprasolidus conditions in the crust continued into the early stages of doming and exhumation of the complex. The structure allows access to variably oriented granites in networks of dykes at deeper structural levels and subhorizontal sheeted granites at shallower structural levels within the complex. This feature allows an evaluation of the mechanisms that modify the composition of granite melts in their source and of granite magmas during their ascent and emplacement using whole-rock major, trace element and Sr and Nd isotope compositions, zircon Hf and O isotope compositions, and phase equilibria modelling of potential source rocks. Geochemical variability within the granites is attributed to source heterogeneity and blending of melts, which themselves are consistent with derivation from regional metasedimentary and metaplutonic source materials. The granites typically contain coarse blocky K-feldspar and/or plagioclase grains within interstitial quartz, and have low Rb/Sr ratios and large positive Eu anomalies. These features are inconsistent with the composition of primary crustal melts derived from metasedimentary and metaplutonic source materials, but consistent with early fractional crystallization of feldspar and subsequent drainage of the fractionated melt. Processes such as peritectic mineral entrainment and accessory mineral dissolution, entrainment and crystallization did not have any significant influence on the major and trace element composition of the granites. The granites in the networks of dykes are interpreted to represent choking of magma transport channels through the middle crust as the rate of magma flow declined during doming and exhumation, whereas the sheeted granites record collapse of subhorizontal, partially crystallized layers of magma by filter pressing and melt exfiltration during vertical shortening associated with doming and exhumation. These processes separated feldspar-rich residues from evolved melt. Based on the results of this study, caution is urged in estimating melt proportion from the volume of granite retained in migmatitic gneiss domes, as the granites may not represent liquid compositions.

**Key words:** cumulate granite; Hf and O isotope geochemistry; migmatite; Nd–Sr isotope geochemistry; zircon

## INTRODUCTION

The generation and segregation of granite melt in the deep crust followed by extraction, ascent and emplacement of magma into the shallow crust are important processes by which the continental crust has become differentiated into a depleted lower portion and a complementary enriched upper portion (Sawyer *et al.*, 2011; Brown, 2013). Reworking of the crust by these processes plays a major role in the redistribution of mass and energy, as well as the heat-producing elements, within the continents. This has important implications for the tectonic history of large hot mountain belts (Jamieson *et al.*, 2011), cooling ultrahigh-temperature (UHT) metamorphic terranes (Korhonen *et al.*, 2013), priming the crust for future UHT metamorphic events (Brown & Korhonen, 2009; Clark *et al.*, 2011), the particular style of some Proterozoic 'hot' orogens (McLaren & Powell, 2014), and the long-term stability of the continental crust (Sandiford & McLaren, 2002).

The composition of melt produced by fluid-absent hydrate-breakdown reactions in deep crustal settings has been determined from experimental melting studies (Skjerlie *et al.*, 1993; Patiño Douce & Harris, 1998; Koester *et al.*, 2002), the analysis of former melt inclusions in peritectic minerals (Acosta-Vigil *et al.*, 2007; Cesare *et al.*, 2007; Ferrero *et al.*, 2011, 2012, 2014; Bartoli *et al.*, 2013) and thermodynamic modelling (White *et al.*, 2011). However, the liquid compositions obtained in these studies may not be representative of the melt extracted from the deep crust during anatexis owing to processes operating throughout extraction and ascent, including the following: peritectic mineral entrainment and dissolution (Brown *et al.*, 1999; Villaros *et al.*, 2009; Taylor & Stevens, 2010; Clemens & Stevens, 2012); mixing between magmas of different sources (e.g. Kemp *et al.*, 2007); variable rates of accessory mineral dissolution and melt extraction (Sawyer, 1991; Watt & Harley, 1993; Zeng *et al.*, 2005a, 2005b, 2005c); fractional crystallization during melt segregation, transport and emplacement (e.g. Sawyer, 1987; Milord *et al.*, 2001; Solar & Brown, 2001; Morfin *et al.*, 2014); source heterogeneity (e.g. Hill *et al.*, 1986; Deniel *et al.*, 1987; Pressley & Brown, 1999). Using benchmarks from experiments, melt inclusions and thermodynamic modelling of source materials, residua and granites allows these processes to be discriminated.

In Marie Byrd Land, West Antarctica, the Fosdick migmatite–granite complex (hereafter the Fosdick complex) is exposed in a mid-Cretaceous syn-anatectic structural dome. Given the oblique section through the crust provided by the dome, the Fosdick complex offers a rare opportunity to evaluate the processes that may modify the composition of anatectic magmas in the source, while migrating through the mid-crust and during emplacement contemporaneous with dome formation.

The timing of polyphase metamorphism, deformation and granite crystallization in the Fosdick complex is well characterized (Korhonen *et al.*, 2010a, 2010b;

Yakymchuk *et al.*, 2015b). In this study we are concerned with the petrogenesis of granites related to the mid-Cretaceous tectonic event. After a summary of the geology of the Fosdick complex, we describe the field relationships and petrology of the gneisses and granites. We use U–Pb zircon geochronology to distinguish Cretaceous granites from older rocks and to assess the duration of granite crystallization in relation to doming. Elemental and isotope geochemistry of lower grade rocks from outside the Fosdick complex and for gneisses and granites from the inside the complex are used to assess source heterogeneity and to determine the contribution of different source components to the granites. The lower grade rocks exposed outside the Fosdick complex are isotopically similar to the gneisses inside the complex. Therefore, these protolith compositions may be used to model maximum melt production during the Cretaceous event. The geochemical data are also used to assess the effects of processes such as fractional crystallization, peritectic mineral entrainment and accessory mineral dissolution, entrainment and crystallization on the compositional evolution of granite magma during syn-tectonic transport and emplacement.

## REGIONAL GEOLOGY

### West Antarctica

In the Phanerozoic, the continental margin of East Gondwana was an active convergent plate margin that stretched from eastern Australia through Antarctica to South America (Veevers, 2012; Fig. 1). A diachronous shift from oblique convergence to oblique divergence along the plate margin during the Albian predated the development of the West Antarctic rift system that eventually separated Zealandia, a continental terrane that includes the Western Province of New Zealand, from West Antarctica (Weaver *et al.*, 1994; Mukasa & Dalziel, 2000; Tulloch *et al.*, 2009b; McFadden *et al.*, 2010a, 2010b).

### Marie Byrd Land

#### *Outside the Fosdick Mountains*

Marie Byrd Land lies along the eastern side of the Ross Sea in West Antarctica (Fig. 1). The oldest exposed unit in western Marie Byrd Land is the Cambrian–Ordovician Swanson Formation, a sub-greenschist- to greenschist-facies folded and cleaved metaturbidite sequence with detrital zircon ages indicating derivation from granite in the Ross–Delamerian orogen and largely unexposed Proterozoic basement (Adams, 1986; Pankhurst *et al.*, 1998; Yakymchuk *et al.*, 2015a). The Devonian–Carboniferous calc-alkaline Ford Granodiorite suite was intruded into the Swanson Formation. These granodiorites have yielded whole-rock Rb–Sr isochron and sensitive high-resolution ion microprobe (SHRIMP) U–Pb zircon ages in the range 375–339 Ma (Adams, 1987;

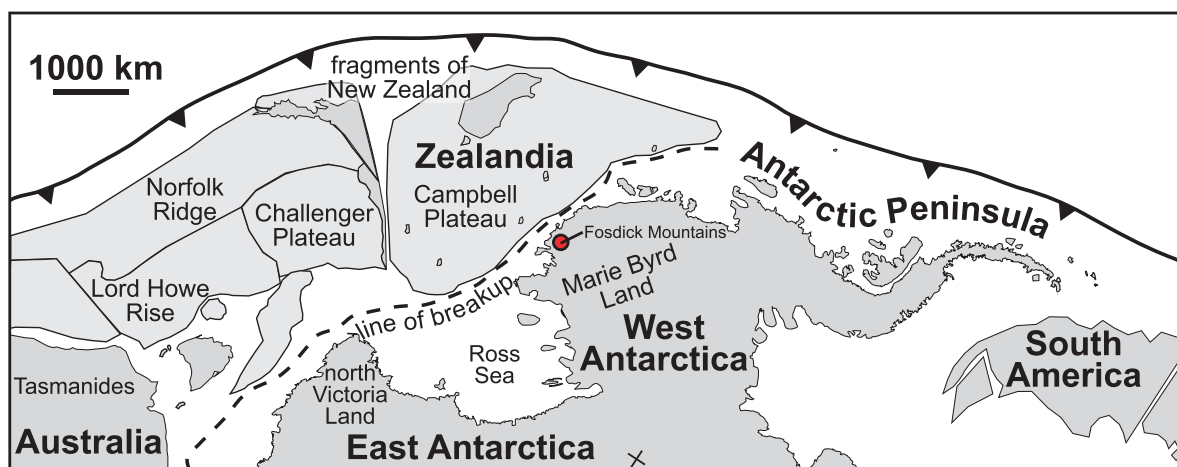

Fig. 1. Geometrical reconstruction of the East Gondwana active convergent margin [modified from fig. 4 of Veevers (2012)].

Pankhurst *et al.*, 1998; Siddoway & Fanning, 2009; Tulloch *et al.*, 2009a; Yakymchuk *et al.*, 2015a).

#### The Fosdick migmatite–granite complex

In the Fosdick Mountains, Cretaceous extensional deformation has exposed an 80 km by 15 km elongate dome of deeper crustal rocks comprising migmatitic gneisses and granites. The Fosdick complex is bounded to the north by an inferred steep dextral strike-slip fault (Siddoway *et al.*, 2004, 2005), and to the south by the South Fosdick detachment, a south-dipping, dextral oblique detachment zone (McFadden *et al.*, 2010a). The complex comprises layered sequences of migmatitic paragneisses and orthogneisses, and associated granites that are cross-cut by mafic dykes (Fig. 2; Richard *et al.*, 1994). Based on whole-rock geochemistry and a similar distribution of detrital zircon age populations from the paragneisses, the migmatitic gneisses are inferred to be the high-grade metamorphic equivalents of the Swanson Formation and the Ford Granodiorite suite (Siddoway *et al.*, 2004; Korhonen *et al.*, 2010b; Yakymchuk *et al.*, 2013b, 2015a).

The Fosdick complex comprises several lithological units that consist of similar rock types but in different proportions (Korhonen *et al.*, 2010a; McFadden *et al.*, 2010a; Yakymchuk *et al.*, 2013a). In the western and central Fosdick Mountains, at deeper structural levels in the complex, a layered plutonic sequence of migmatitic orthogneisses with minor granites and migmatitic paragneisses dominates much of the outcrop from Mt Iphigene to Mt Lockhart (Fig. 2). In the extreme west of the study area and around Mt Avers in the centre (Fig. 2), a thick unit of residual migmatitic paragneiss comprising biotite–sillimanite-bearing melanosomes and garnet and/or cordierite-bearing leucosomes dominates the outcrops, and orthogneisses are rare. The leucosomes commonly link to granite in dykes that cut across the layering. In the eastern Fosdick Mountains, at shallower structural levels, a sheeted leucogranite complex dominates the outcrop from Mt Bitgood to Bird Bluff (Fig. 2). This unit is composed of thick subhorizontal

leucogranites interlayered with thinner migmatitic paragneiss and orthogneiss horizons. A prominent subhorizontal foliation is defined by biotite and sillimanite and is parallel to alternating leucogranite sheets and layers of gneiss. Cretaceous mafic dykes in this unit are generally folded and boudinaged (Siddoway *et al.*, 2005; McFadden *et al.*, 2010a; Saito *et al.*, 2013).

Based on U–Pb zircon and monazite ages, two episodes of regional metamorphism and crustal anatexis affected the Fosdick complex, one related to arc magmatism in the Devonian–Carboniferous and a second higher-grade event owing to crustal thickening in the Early Cretaceous (Siddoway *et al.*, 2004; Korhonen *et al.*, 2010a, 2010b, 2012). Anatectic granites were produced during both metamorphic events (Siddoway *et al.*, 2004; Korhonen *et al.*, 2010b; Yakymchuk *et al.*, 2015b). Devonian–Carboniferous metamorphism is cryptic owing to the Cretaceous overprint, but it is unambiguously recorded by Carboniferous-age cores in monazite grains with Cretaceous rims (Korhonen *et al.*, 2012; Yakymchuk *et al.*, 2015b). The pressure ( $P$ ) and temperature ( $T$ ) conditions of this metamorphism have proven difficult to constrain because of uncertainty about the age of peritectic garnet (Korhonen *et al.*, 2012). However, recent Lu–Hf garnet geochronology indicates that garnet is part of the Cretaceous metamorphic phase assemblage (Yakymchuk *et al.*, 2015b). Without garnet in the phase assemblage, peak conditions of the older metamorphic event are estimated to have been 680–800°C at 0.60–0.95 GPa (Yakymchuk *et al.*, 2015b).

For the Cretaceous metamorphism, Korhonen *et al.* (2010a) and Yakymchuk *et al.* (2015b) calculated peak metamorphic conditions of 830–870°C at 0.60–0.75 GPa. The significantly higher temperatures for the younger metamorphism, combined with the monazite and garnet geochronology, indicate that the dominant anatectic event in the formation of the migmatitic gneisses occurred during the Cretaceous. Mafic dykes were emplaced into the Fosdick complex during and after final crystallization of residual melt within the migmatitic gneisses.

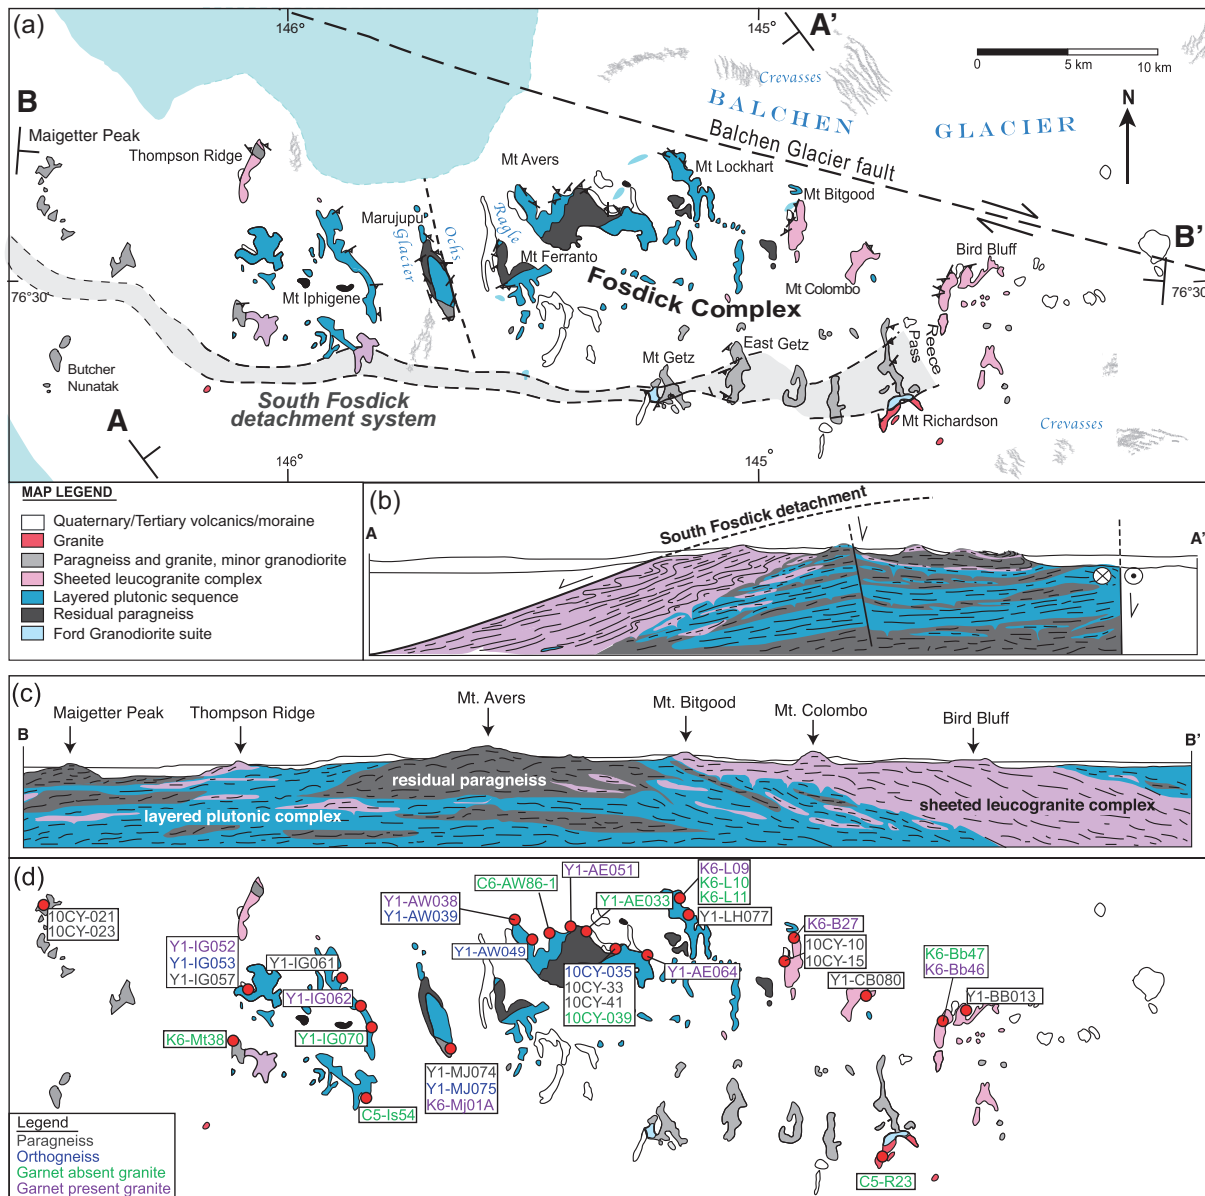

**Fig. 2.** (a) Geological map and (b, c) schematic cross-sections (no vertical exaggeration) of the Fosdick migmatite–granite complex (modified from Siddoway *et al.*, 2004; McFadden *et al.*, 2010b; Yakymchuk *et al.*, 2013b). (d) Sample location map of the Fosdick complex.

## FIELD RELATIONS AND PETROGRAPHY

### Swanson Formation

Outside the Fosdick Mountains, the Swanson Formation is dominated by poorly sorted metagreywackes with subordinate amounts of slate and phyllite and rare ovoid calcareous nodules. Finer-grained layers have proportionally more biotite and less quartz; the schistosity is defined by the parallel alignment of biotite.

### Ford Granodiorite suite

The Ford Granodiorite suite is well exposed outside the Fosdick Mountains, where it forms kilometer-scale plutons that crop out as isolated peaks. The Ford Granodiorite suite ranges in composition from

granodiorite to monzogranite, with the former being the most common (Weaver *et al.*, 1991; Yakymchuk *et al.*, 2015a). These rocks are generally equigranular, although some outcrops are porphyritic with plagioclase phenocrysts, and typically unfoliated. Brown biotite dominates over green hornblende as the dominant ferromagnesian mineral.

### The Fosdick complex Migmatitic gneisses

**Paragneiss.** Migmatitic paragneiss is composed of alternating thicker metapelite layers, up to several tens of centimeters thick, and thinner metapsammite layers (Fig. 3a). Leucosome is concentrated in the metapelite layers, defining a stromatic layering that is generally

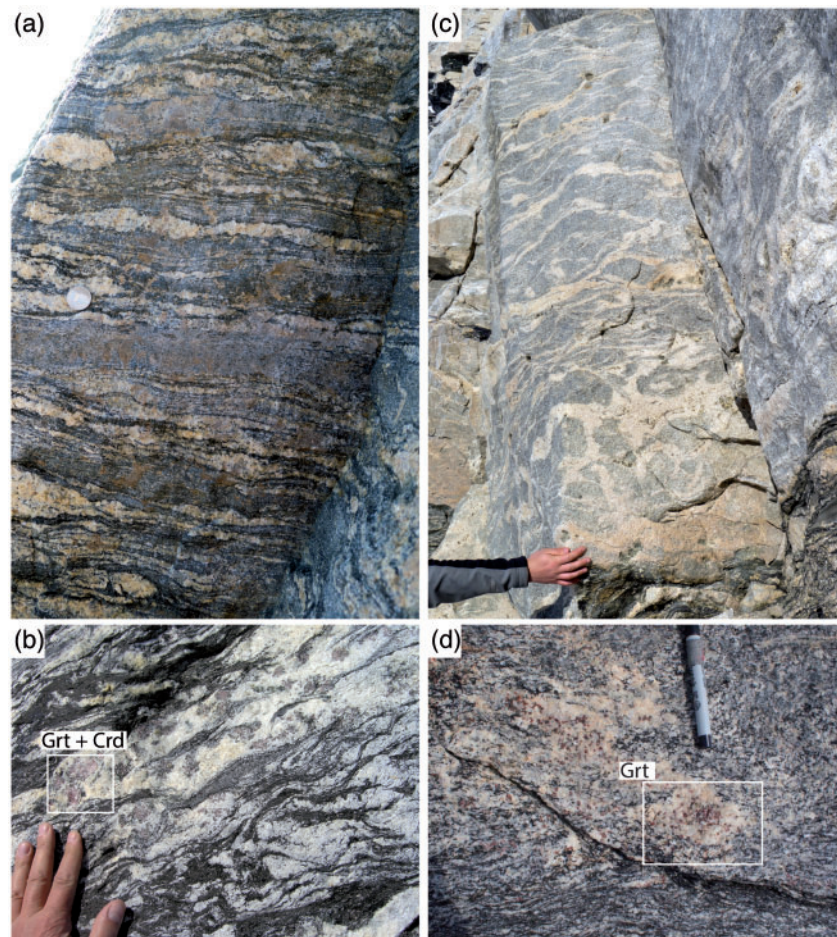

**Fig. 3.** (a) Stromatic leucosomes in migmatitic paragneiss. (b) Peritectic garnet and cordierite in leucosomes in migmatitic paragneiss. (c) Anastomosing network of leucosomes in migmatitic orthogneiss. (d) Peritectic garnet surrounded by leucosome in migmatitic orthogneiss.

parallel to primary compositional layering and subhorizontal to shallow-dipping throughout the Fosdick complex. Leucosomes up to 30 cm thick make up 43–72 vol. % of the outcrop (Yakymchuk *et al.*, 2013a); they comprise quartz, plagioclase and K-feldspar, with or without biotite, garnet and cordierite (Fig. 3b). Melanosomes are finer grained than leucosomes and typically contain biotite, quartz, cordierite, garnet, sillimanite, plagioclase, K-feldspar, and rare oxides. Accessory monazite, zircon and apatite are found as inclusions in the rock-forming minerals or along grain boundaries.

**Orthogneiss.** Migmatitic orthogneiss is more homogeneous than the paragneiss (Fig. 3c). There is a shallow to moderately dipping foliation defined by the parallel alignment of biotite grains. Stromatic leucosomes, which are continuous over >20 cm and range from a few centimeters to 2 m thick, form an anastomosing network rather than the strongly defined layering of the migmatitic paragneiss (Fig. 3c). Associated melanosomes comprise quartz, plagioclase, K-feldspar and biotite, with or without garnet. The stromatic leucosomes, which are in petrographic continuity with leucosome in normal-sense shear zones (Fig. 3c), have the

same mineralogy as the melanosome, but commonly with coarse tabular feldspar phenocrysts and lesser amounts of biotite and garnet (Fig. 3d). Cordierite is rare and typically occurs in discordant leucosomes as inclusion-free euhedral grains. Accessory zircon, monazite and apatite occur as inclusions in the rock-forming minerals or along grain boundaries.

**Cretaceous granites.** Cretaceous granites throughout the Fosdick complex exhibit a range of field relationships with the host-rock, have variable mineralogy and microstructures, and may be heterogeneous at the decimeter to meter scale. Single granite bodies vary from dykes to tabular sills (Fig. 4a–d) and range from decimeters to decameters thick. In the east, at shallower structural levels, most granites are concordant with the dominant subhorizontal foliation throughout the Fosdick complex (Fig. 4a), whereas to the west at deeper structural levels, the granites tend to be discordant (Fig. 4b–e), in some cases intersecting to form cylindrical structures (Fig. 4b) that may represent conduits for faster melt transport (Brown, 2013). These discordant granites generally show petrographic continuity with concordant leucosome and granite in the host-

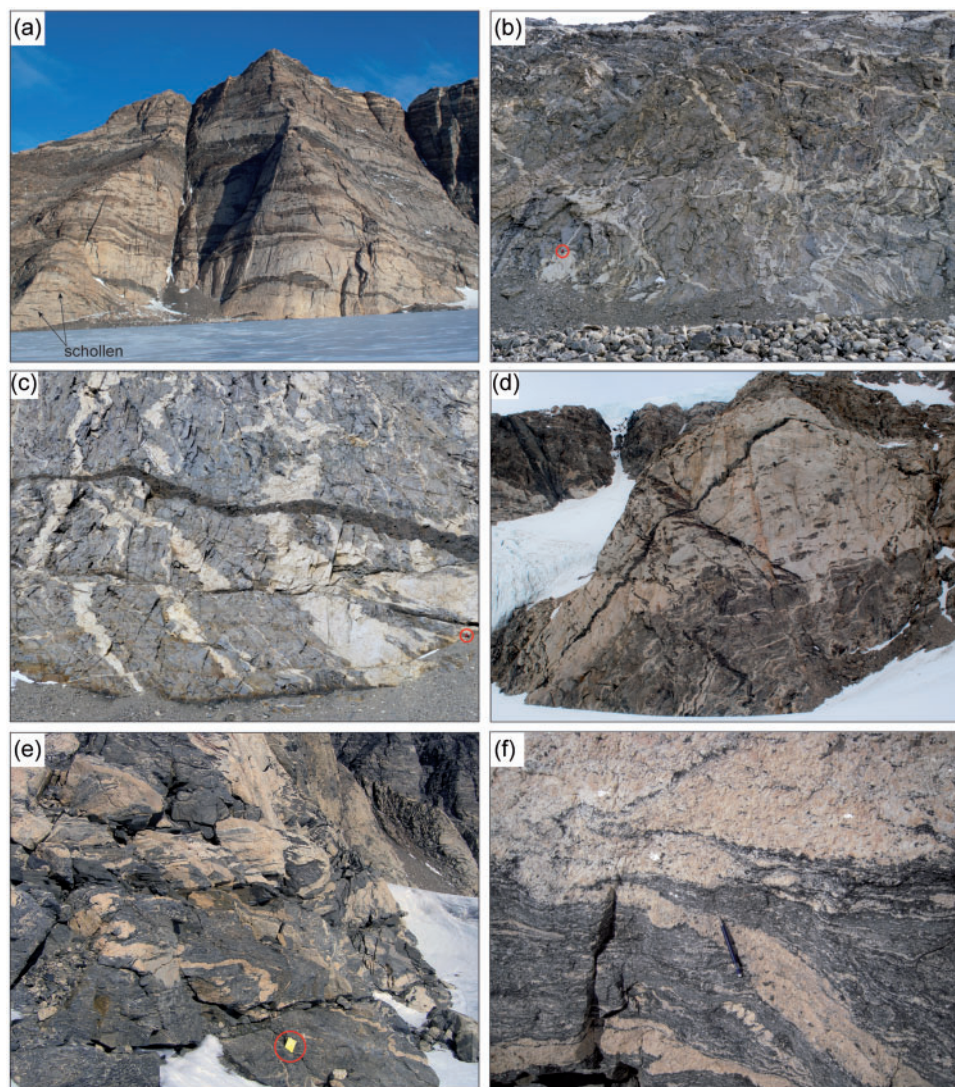

**Fig. 4.** (a) Sheeted leucogranite complex in the Eastern Fosdick Mountains. Subhorizontal meter- to decameter-scale leucogranite sheets contain schollen of paragneiss, orthogneiss and mafic rocks. Cliff height is c. 600 m. (b) Residual paragneiss unit with multiple discordant leucogranite bodies that intersect to form a pipe in the centre of the photograph. Circle indicates a person for scale. (c) Concordant and discordant granite bodies in migmatite paragneiss. The circle contains a person for scale and indicates the sampling location of Y1-AE051. (d) Heterogeneous garnet-bearing granite that contains schollen of paragneiss and mafic rocks (sample Y1-IG062). The cliff height is c. 100 m. (e) Discordant granite intruding migmatite paragneiss (sample 10CY-41). Field notebook for scale. (f) K-feldspar rich granite (sample 10CY-039).

rock, and have similar mineralogy, mode and grain size (Fig. 4f), which is inferred to record simultaneous final crystallization. Thus, the leucosomes and granites are interpreted to have formed part of the same melt extraction network (e.g. Yakymchuk *et al.*, 2013a). Schollen of paragneiss, orthogneiss and mafic rock are commonly present aligned parallel to the layering in the wall-rocks (Fig. 4a), and schlieren of biotite  $\pm$  garnet  $\pm$  cordierite occur locally in the smaller granite dykes and towards the margins of larger dykes.

Granites are generally coarse-grained (2–10 mm), but some bodies contain discontinuous layers with different mean grain sizes. Discordant granites are commonly coarser-grained in the centre and finer-grained towards the margins; they are biotite-bearing, leucocratic and locally may contain up to 30 vol. %

garnet or cordierite. Many granites contain blocky euhedral plagioclase or K-feldspar with interstitial quartz (Fig. 5).

Nine Cretaceous granites from the Fosdick complex were the focus of this study. Samples 10CY-039, Y1-AE064 and Y1-AW038 are biotite  $\pm$  garnet granites collected from Mt Avers in the Central Fosdick Mountains; they are characterized by coarse-grained K-feldspars. The remaining six samples are from Mt Avers (Y1-AE033, Y1-AE051, and C6-AW86-1) and Mt Iphigene (Y1-IG052, Y1-IG062, and Y1-IG070); they are coarse-grained biotite  $\pm$  garnet  $\pm$  cordierite granites with euhedral tabular plagioclase and K-feldspar. In addition, 10 Cretaceous granites for which analytical data were previously reported by Korhonen *et al.* (2010b) are included in the discussion of granite petrogenesis.

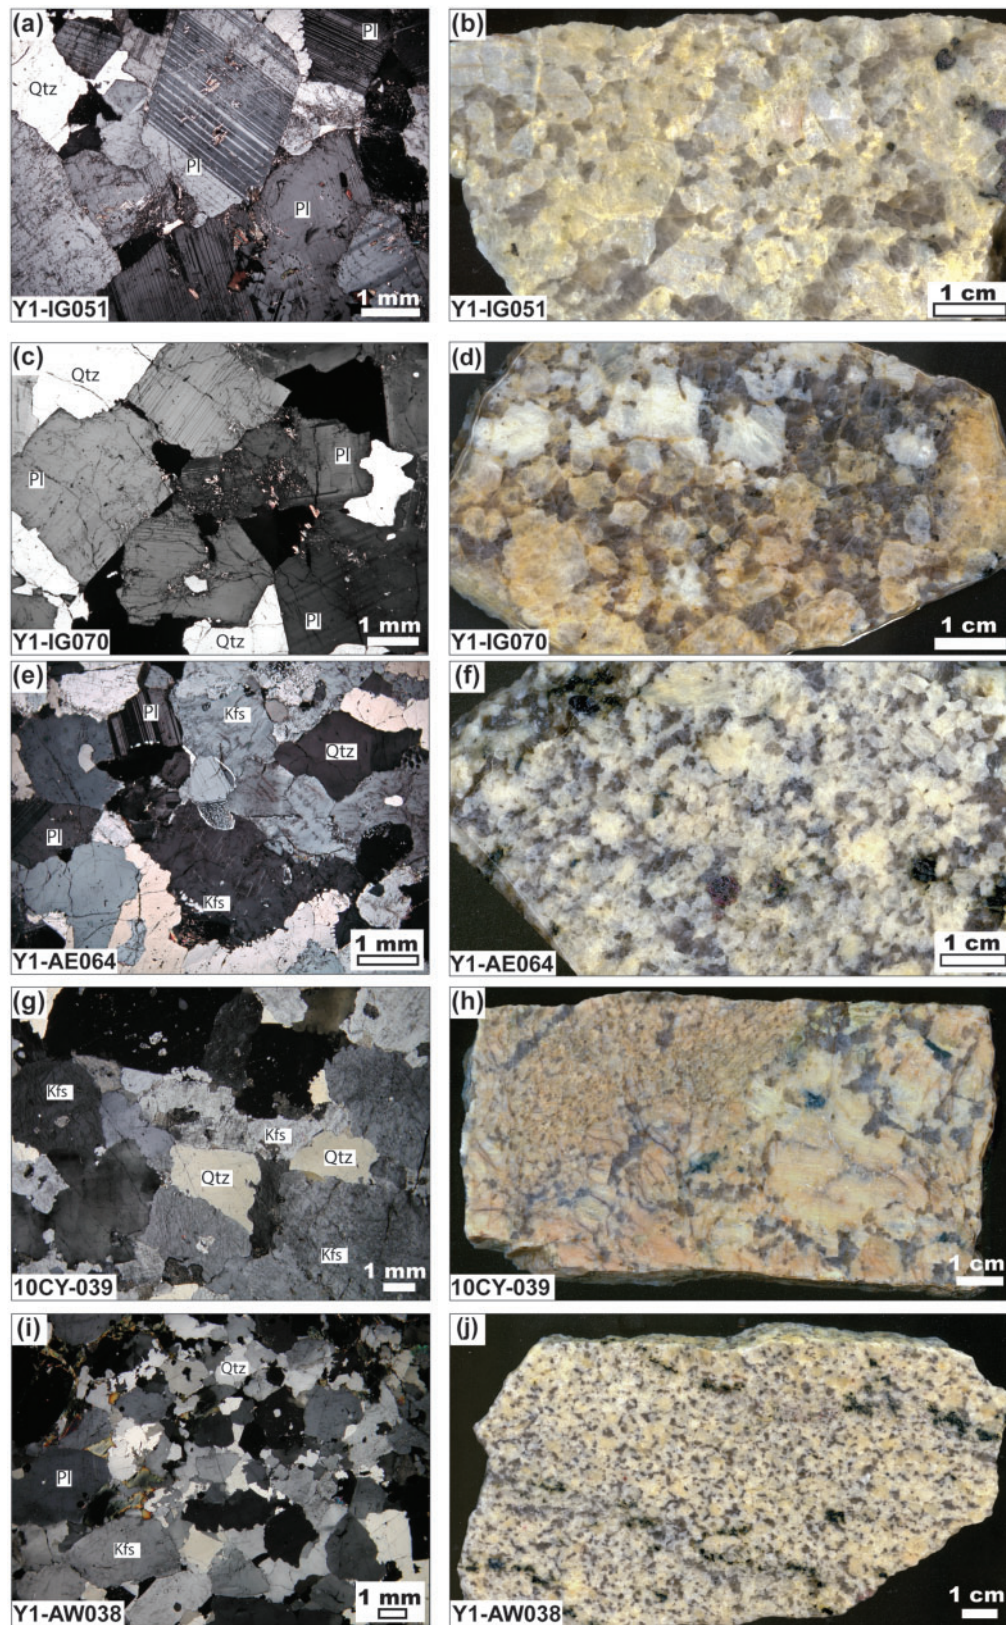

**Fig. 5.** Cumulate microstructures in Cretaceous granites from the Fosdick migmatite–granite complex. (a, b) Coarse plagioclase grains with interstitial quartz and K-feldspar. (c, d) Euhedral plagioclase grains in contact with interstitial quartz. (e, f) Interlocking plagioclase and K-feldspar crystals with interstitial quartz. (g, h) Heterogeneous K-feldspar granite with coarse-grained phenocrysts of K-feldspar. (i, j) Granite comprising K-feldspar and plagioclase grains with interstitial quartz.

## ANALYTICAL METHODS

### U–Pb zircon geochronology

Zircon U–Pb geochronology was used to determine the age of the orthogneiss protoliths and to evaluate the timing of Cretaceous granite crystallization in the Fosdick complex. Two analytical techniques were used during this study, as discussed below.

#### *Sensitive high-resolution ion microprobe (SHRIMP)*

U–Pb zircon age determinations were made using SHRIMP II and SHRIMP-RG at the Australian National University Research School of Earth Sciences (ANU-RSES) following the procedures described by Williams (1998, and references therein) and using a spot size of  $\sim 20\ \mu\text{m}$ . Data were reduced using the SQUID Excel Macro (Ludwig, 2001). The zircon U/Pb ratios have been normalized relative to a value of 0.0668 for the Temora reference zircon, equivalent to an age of 417 Ma (Black *et al.*, 2003); analytical uncertainties for the respective analytical sessions are given in the footnotes to Supplementary Data Electronic Appendix Table 1 (supplementary data are available for downloading at <http://www.petrology.oxfordjournals.org>). Uncertainties reported for single analyses (ratios and ages) are given at the  $1\sigma$  level.

#### *Laser ablation inductively coupled plasma mass spectrometry (LA-ICP-MS)*

Zircon grains (generally 50–100) were incorporated into a 1 inch epoxy mount together with fragments of the Sri Lanka standard zircon at the University of Arizona. The mounts were sanded down to a depth of  $\sim 20\ \mu\text{m}$ , polished, imaged, and cleaned prior to isotopic analysis. U–Pb geochronology of zircons was conducted by laser ablation multicollector inductively coupled plasma mass spectrometry (LA-MC-ICP-MS) at the Arizona LaserChron Center. The analyses involved ablation of zircon with a Photon Machines Analyte G2 excimer laser using a spot diameter of  $30\ \mu\text{m}$ , a fluence of  $\sim 5\ \text{J cm}^{-2}$  and a repetition rate of 7 Hz. Isotopes of U, Th and Pb were measured simultaneously using a Nu Plasma high-resolution ICP-MS system. The complete analytical protocol has been described by Gehrels *et al.* (2008). Results are provided in Supplementary Data Electronic Appendix Table 2.

For both SHRIMP and ICP-MS U–Pb zircon geochronology, Tera–Wasserburg (Tera & Wasserburg, 1972) concordia plots and weighted mean  $^{238}\text{U}/^{206}\text{Pb}$  ages were calculated using ISOPLOT/EX (Ludwig, 2003). Where appropriate the ‘Mixture Modelling’ algorithm of Sambridge & Compston (1994) via ISOPLOT/EX has been used to unmix statistical age populations or groupings. From such groupings weighted mean  $^{238}\text{U}/^{206}\text{Pb}$  ages have been calculated and the uncertainties are reported as 95% confidence limits, including incorporation, in quadrature, of the uncertainty in the reference zircon calibration. These ages are summarized in Table 1.

**Table 1:** Summary of U–Pb geochronology results

| Sample             | Method    | U–Pb age (Ma)    | MSWD | <i>n</i> |
|--------------------|-----------|------------------|------|----------|
| <i>Orthogneiss</i> |           |                  |      |          |
| Y1-AW039           | LA-ICP-MS | $368.5 \pm 5.3$  | 1.1  | 15       |
| Y1-IG053           | LA-ICP-MS | $366.8 \pm 6.2$  | 2.9  | 23 of 24 |
|                    | SHRIMP    | $366.6 \pm 2.2$  | 0.56 | 14 of 17 |
| K6-B26             | SHRIMP    | $365.7 \pm 2.1$  | 3.3  | 17       |
| Y1-AW049           | LA-ICP-MS | $361.2 \pm 6.2$  | 1.8  | 19 of 20 |
| Y1-MJ075           | LA-ICP-MS | $115.5 \pm 3.7$  | 2.2  | 7        |
| 10CY-035           | LA-ICP-MS | c. 360, 320, 100 | —    | —        |
| <i>Granites</i>    |           |                  |      |          |
| Y1-IG062           | LA-ICP-MS | $363.5 \pm 3.9$  | 1.9  | 13 of 16 |
|                    | SHRIMP    | No age           | —    | —        |
| Y1-AW038           | LA-ICP-MS | $107.9 \pm 2.6$  | 2.9  | 16       |
|                    | SHRIMP    | $103.0 \pm 1.1$  | 0.69 | 4 of 25  |
| Y1-IG070           | LA-ICP-MS | $106.9 \pm 0.8$  | 1.2  | 18       |
|                    | SHRIMP    | $106.6 \pm 1.1$  | 1.7  | 10 of 25 |
| 10CY-039           | LA-ICP-MS | $106.5 \pm 1.5$  | 1.9  | 22       |
| Y1-AE033           | LA-ICP-MS | $106.2 \pm 2.1$  | 0.4  | 18 of 19 |
| Y1-AE051           | LA-ICP-MS | $104.8 \pm 1.8$  | 3.7  | 23       |
| Y1-IG052           | LA-ICP-MS | $103.5 \pm 2.9$  | 4    | 14 of 17 |
| Y1-AE064           | LA-ICP-MS | $103.2 \pm 1.5$  | 1.7  | 19 of 24 |

### Major oxide, trace element and REE chemistry

Whole-rock major and trace element compositions were determined for gneisses and granites to quantify the chemical variation of these rocks and, together with literature data, to evaluate the various processes that potentially could have modified anatectic melt compositions.

Major oxide and select trace elements were analysed by X-ray fluorescence spectrometry (XRF) at Franklin and Marshall College. A PANanalytical 2404 X-ray fluorescence spectrometer equipped with a PW2540 X–Y sample handler was used following the procedures described by Boyd & Mertzman (1987).  $\text{Fe}_2\text{O}_3$  was measured by XRF and FeO was determined by  $\text{Fe}^{2+}$  titration.

Rare earth elements (REE) were analysed by ICP-MS at the University of Maryland. Twenty milligrams of powdered sample were dissolved in closed Savillex® Teflon beakers using 0.5 ml of 14 M  $\text{HNO}_3$  and 3 ml of 29 M HF. Samples were digested for 24 h, dried down and subjected to a second dissolution in 0.25 ml of 12 M  $\text{HClO}_4$ , 0.5 ml of 14 M  $\text{HNO}_3$  and 3 ml of 29 M HF for 72 h. The solution was dried down, brought up in 6 M HCl and dissolved for a further 24 h; this last procedure was repeated until the sample was fully dissolved. Samples were diluted by a factor of 100. One milliliter of a 20 ppb  $^{115}\text{In}$  solution was added to the diluted sample to allow correction for instrumental drift.

The isotopes  $^{115}\text{In}$ ,  $^{139}\text{La}$ ,  $^{140}\text{Ce}$ ,  $^{141}\text{Pr}$ ,  $^{143}\text{Nd}$ ,  $^{147}\text{Sm}$ ,  $^{153}\text{Eu}$ ,  $^{158}\text{Gd}$ ,  $^{159}\text{Tb}$ ,  $^{163}\text{Dy}$ ,  $^{165}\text{Ho}$ ,  $^{167}\text{Er}$ ,  $^{169}\text{Tm}$ ,  $^{173}\text{Yb}$  and  $^{175}\text{Lu}$  were analysed using a Finnigan Element 2 single-collector ICP-MS system; solutions were introduced into the plasma using an APEX desolvating nebulizer. Concentrations were determined using a standard-bracketing method using USGS standards G-2, a granite, and MAG-1, a marine sediment. Element concentrations in gneisses and granites were determined using G-2 as the primary standard, whereas the



concentrations of metasedimentary and paragneiss samples were determined using MAG-1. Signals were corrected for instrumental drift, by normalizing all data to the  $^{115}\text{In}$  signal in the G-2 standard, and the blank, which was <0.1% of the signal for standards and <0.7% of the signal for unknowns. Uncertainties from counting statistics ranged from 1 to 6%, and propagated uncertainties for concentrations ranged from 4 to 12%.

### Whole-rock Rb, Sr, Sm and Nd isotope compositions

Whole-rock isotope compositions were acquired to evaluate the heterogeneity of the inferred source rocks and the granites, and to quantify the relative contributions of possible source components to granite petrogenesis.

Rb, Sr, Sm and Nd isotope compositions were determined in the Isotope Geochemistry Laboratory at the University of Maryland. The rocks were prepared in a manner similar to that of Korhonen *et al.* (2010b). Fifty milligrams of powder were dissolved in Savillex<sup>®</sup> Teflon beakers using 3 ml of 29M HF and 0.5 ml of 14M HNO<sub>3</sub>, together with isotopic spikes enriched in  $^{87}\text{Rb}$ ,  $^{84}\text{Sr}$ ,  $^{149}\text{Sm}$ , and  $^{150}\text{Nd}$ , using a closed digestion at 180–190°C for 24 h. Samples were dried and re-dissolved in 3 ml of 29M HF, 0.5 ml of 14M HNO<sub>3</sub>, and 0.25 ml of 12M HClO<sub>4</sub>, and digested for a further 72 h at 180–190°C, then dried. To finish, 2 ml of 6M HCl was added to the samples, which were digested at 180°C for 24 h and dried again; this last procedure was repeated until the resulting solution was clear, after which samples were finally dried and brought up in 2 ml of 2.5M HCl.

Rubidium, Sr and REE were separated from each other using a primary cation exchange column filled with AG50Wx4 (200–400 mesh) resin. Samples were loaded in chloride form. Rubidium and Sr were eluted in 2.5M HCl, whereas the REE were eluted from the column in 6M HCl. Rubidium cuts were dried and diluted in 2% HNO<sub>3</sub>. Strontium cuts were passed through a cleanup column filled with Eichrom<sup>™</sup> Sr-spec resin and eluted in 0.05M HNO<sub>3</sub>. The REE cuts from the primary column were passed through a secondary column filled with 0.225M 2-methylactic acid (MLA). Samarium and Nd were eluted in 0.225M MLA (pH = 4.67).

Strontium, Nd and Sm isotope ratios were analysed using a VG Sector 54 thermal ionization mass spectrometry (TIMS) system or a Nu Plasma multi-collector (MC)-ICP-MS system. Samples 10CY-003, Y1-AW039, Y1-CB080, Y1-IG070, and Y1-LH077 were analyzed for Nd using a Nu Plasma MC-ICP-MS system. Sample 10CY-039 was analysed for Sm also using the Nu Plasma ICP-MS system. For the remaining samples, Sr, Nd and Sm isotope ratios were analysed using TIMS. Rubidium ratios were measured using a Nu Plasma MC-ICP-MS system at the University of Maryland. Samples were diluted by a factor of 100 and were introduced into the plasma using an Aridus I desolvating nebulizer. A 50 ppb Rb SpecPure<sup>®</sup> plasma standard was introduced after every three sample analyses and was used to

correct for instrumental fractionation and drift. Rubidium blanks averaged 8.04 ppm ( $n = 4$ ), <1% of the sample Rb concentrations.

Strontium cuts (~390 ng) were loaded onto a single Re filament with a Ta-oxide activator, and analysed in a multi-dynamic mode. Strontium isotopes were corrected for mass fractionation by normalizing the measured  $^{87}\text{Sr}/^{86}\text{Sr}$  ratio to an  $^{86}\text{Sr}/^{88}\text{Sr}$  ratio = 0.1194. The mass fractionation and spike corrected  $^{87}\text{Sr}/^{86}\text{Sr}$  ratio was normalized to an average SRM 987  $^{87}\text{Sr}/^{86}\text{Sr}$  value of 0.71034 (NIST) to correct for instrumental bias. Strontium blank concentrations averaged 14.0 ng ( $n = 4$ ), <1% of sample Sr concentrations.

Neodymium cuts (~200 ng) were loaded on two Re filaments with phosphoric acid and loaded into the machine in a triple-filament arrangement. Neodymium ratios were measured in dynamic mode and corrected for mass fractionation by normalizing the measured  $^{143}\text{Nd}/^{144}\text{Nd}$  ratio to  $^{146}\text{Nd}/^{144}\text{Nd} = 0.7219$ . All  $^{143}\text{Nd}/^{144}\text{Nd}$  ratios measured in the samples were corrected for instrumental bias to an AMES standard  $^{143}\text{Nd}/^{144}\text{Nd}$  value of 0.512153 (in-house TIMS measurements). Samarium was measured in static mode. Samarium blanks averaged 0.311 ng ( $n = 3$ ) whereas Nd blanks averaged 2.28 ng ( $n = 3$ ); both <1% of sample Sm and Nd concentrations.

The USGS G-2 granite was analysed seven times over a period of 12 months. Repeat analyses yielded an average  $^{87}\text{Sr}/^{86}\text{Sr}$  of  $0.709767 \pm 0.000038$  ( $n = 7$ ) and an average  $^{143}\text{Nd}/^{144}\text{Nd}$  of  $0.512243 \pm 0.000010$  ( $n = 7$ ). Rubidium concentrations averaged 167.6 ppm (range 162.9–174.2 ppm) and Sr concentrations 488.8 ppm (range 482.1–496.2 ppm), which are slightly offset from the USGS recommended values of  $170 \pm 3$  ppm for Rb and  $478 \pm 2$  ppm for Sr. Samarium concentrations averaged 7.1 ppm (range 7.0–7.3 ppm) and Nd concentrations 52.6 ppm (range 52.2–53.2 ppm), which are within uncertainty of the USGS recommended values of  $7.2 \pm 0.7$  for Sm and  $55 \pm 6$  for Nd.

### Lu–Hf and O analysis of zircon

Hf and O isotope compositions of zircon were determined to quantify heterogeneity of the inferred source rocks and the granites, and to assess the relative contribution of possible source components to the petrogenesis of the granites.

Following the U–Pb analyses, the SHRIMP 1–2 μm deep U–Pb pits were lightly polished away and oxygen isotope analyses were made in the same location using a SHRIMP II fitted with a Cs ion source and electron gun for charge compensation as described by Ickert *et al.* (2008). Oxygen isotope ratios were determined in multiple-collector mode using an axial continuous electron multiplier (CEM) triplet collector, and two floating heads with interchangeable CEM–Faraday cups. The Temora 2 and FC1 reference zircons were analysed to monitor and correct for isotope fractionation. The measured  $^{18}\text{O}/^{16}\text{O}$  ratios and calculated  $\delta^{18}\text{O}$  values have

been normalized relative to an FC1 weighted mean  $\delta^{18}\text{O}$  value of  $+5.4\text{‰}$  (Ickert *et al.*, 2008). Reproducibility in the Duluth Gabbro FC1 reference zircon  $\delta^{18}\text{O}$  value ranged from  $\pm 0.30$  to  $0.37\text{‰}$  ( $2\sigma$  uncertainty) for the analytical sessions. As a secondary reference, the Temora 2 zircon was analysed in the same sessions, which gave  $\delta^{18}\text{O}$  values of  $+8.2\text{‰}$  in agreement with data reported by Ickert *et al.* (2008).

Lu–Hf isotope measurements were conducted by LA-MC-ICP-MS using the ANU-RSES Neptune MC-ICP-MS system coupled with a 193 nm ArF Excimer laser, following procedures similar to those described by Munizaga *et al.* (2008). For all analyses of unknowns or secondary standards, the laser spot size was  $\sim 47\ \mu\text{m}$  in diameter. Laser ablation analyses targeted the same locations within single zircon grains used for both the U–Pb and oxygen isotope analyses described above. The mass spectrometer was first tuned to optimal sensitivity using a large grain of zircon from the Mud Tank carbonatite. Isotopic masses were measured simultaneously in static collection mode. A gas blank was acquired at regular intervals throughout the analytical session (every 12 analyses). Typically the laser was fired with a 5–8 Hz repetition rate and 50–60 mJ energy. Data were acquired for 100 s, but in many cases only a selected interval from the total acquisition was used in data reduction.

Throughout the analytical session several widely used reference zircons were analysed to monitor data quality and reproducibility. Signal intensity was typically  $\sim 5\text{--}6\text{V}$  for total Hf at the beginning of ablation, and was decreased over the acquisition time to 2 V or less. Isobaric interferences of  $^{176}\text{Lu}$  and  $^{176}\text{Yb}$  on the  $^{176}\text{Hf}$  signal were corrected by monitoring signal intensities of  $^{175}\text{Lu}$  and  $^{173}\text{Yb}$ ,  $^{172}\text{Yb}$  and  $^{171}\text{Yb}$ . The calculation of signal intensity for  $^{176}\text{Hf}$  also involved independent mass bias corrections for Lu and Yb [see Munizaga *et al.* (2008) for further details]. During the course of data collection the reference zircons gave the following weighted mean  $^{176}\text{Hf}/^{177}\text{Hf}$  ratios: 91500 =  $0.282310 \pm 14$  ( $\pm 2\sigma$ ) for 23 analyses, Mud Tank =  $0.282516 \pm 11$  for eight analyses, FC1 =  $0.282173 \pm 9$  for 22 of 23 analyses, Plesovice =  $0.282486 \pm 11$  for 16 of 17 analyses, and Monastery =  $0.282744 \pm 12$  for eight analyses. These are within analytical uncertainty of the values reported by Woodhead & Hergt (2005).

## ZIRCON U–PB GEOCHRONOLOGY

### The Fosdick complex

#### *Orthogneisses*

Zircons from sample Y1-AW039 show oscillatory zoning in cathodoluminescence (CL) images; they are a mix of elongate and stubby, euhedral to anhedral grains and some have xenocrystic cores (Fig. 6). The LA-ICP-MS data from this sample yield a generally uniform age of  $368.5 \pm 5.3\text{Ma}$  (Fig. 7;  $n = 15$ ; MSWD = 1.1), which is

interpreted as the crystallization age of the Ford Granodiorite suite protolith.

Zircons from sample Y1-IG053 are stubby to elongate, prismatic and oscillatory zoned in CL images; a few grains have bright, resorbed cores (Fig. 6). The LA-ICP-MS data for this sample yield a Devonian age of  $366.8 \pm 6.2\text{Ma}$  (Fig. 7;  $n = 23$  of 24; MSWD = 2.9). In contrast, SHRIMP data yield a range of dates from 390 to 345 Ma (with three dates of 533, 300 and 287 Ma), with a dominant group of 14 dates that yield an age of  $366.6 \pm 2.2\text{Ma}$  (MSWD = 0.56), essentially the same as the LA-ICP-MS age (Figs 7 and 8). The two younger SHRIMP dates of 300 and 287 Ma are from narrow dark rims that mantle bright oscillatory zoned cores. These younger dates are interpreted to result from modification by a process such as Pb loss during the Cretaceous metamorphic overprint. Therefore, the *c.* 366 Ma age is interpreted to be the crystallization age of the Ford Granodiorite suite protolith.

Zircons from sample K6-B26 are elongate and prismatic with oscillatory zoning in CL images (Fig. 6). A minor population of zircon has resorbed bright oscillatory zoned cores mantled by dark rims (Fig. 6). SHRIMP data from zircons with simple oscillatory zoning in this sample yield a range of dates from *c.* 376 to *c.* 335 Ma, with three younger dates of 317, 285 and 105 Ma. A group of 17 of the oldest dates yield an age of  $365.7 \pm 2.1\text{Ma}$  (Fig. 7; MSWD = 3.3). Two of the younger dates (317 and 285 Ma) are interpreted to result from Pb loss during the Cretaceous metamorphic overprint. A single date of *c.* 105 Ma, which is from a dark rim surrounding a resorbed and bright oscillatory-zoned core, is interpreted to represent new zircon growth from anatectic melt. This interpretation is supported by monazite U–Pb geochronology for this sample, which yielded exclusively Cretaceous ages (Korhonen *et al.*, 2012). The Devonian age is interpreted to be the crystallization age of the Ford Granodiorite suite protolith.

Oscillatory zoned zircons from sample Y1-AW049 are stubby to elongate and prismatic; a few grains have embayed cores (Fig. 6). LA-ICP-MS analysis of zircon cores and rims yields a Devonian age of  $361.2 \pm 6.2\text{Ma}$  (Fig. 7;  $n = 19$  of 20; MSWD = 1.8). Because high-grade metamorphism and anatexis of the orthogneiss is interpreted to be of Cretaceous age (Yakymchuk *et al.*, 2015b), the Devonian age retrieved from this sample is interpreted to be the crystallization age of the Ford Granodiorite suite protolith.

Zircons from Y1-MJ075 are stubby to elongate (Fig. 6). The LA-ICP-MS data yield dates that range from *c.* 1520 to *c.* 100 Ma for this sample, with a dominant population that gave an age of  $115.5 \pm 3.7\text{Ma}$  (Fig. 7;  $n = 7$ ; MSWD = 2.2), which is interpreted to date the Cretaceous high-grade metamorphic event.

Zircons from sample 10CY-035 are elongate and prismatic. They have bright cores with darker zoned mantles surrounded by very thin bright rims in CL images (Fig. 6). The LA-ICP-MS data for this sample yield a range of dates from *c.* 380 to *c.* 100 Ma, with three

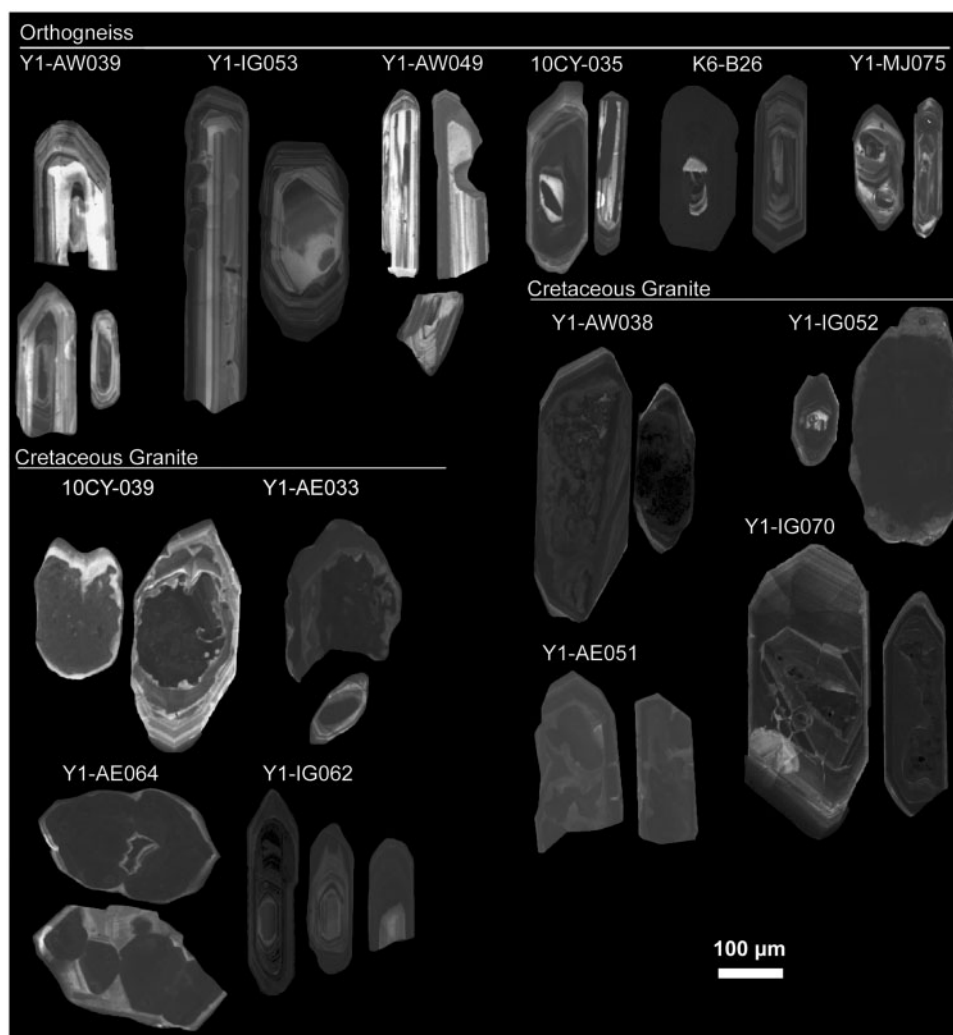

**Fig. 6.** Cathodoluminescence images of representative zircon grains from orthogneisses and Cretaceous granites. Cathodoluminescence images were collected on different dates and so exhibit some variation in quality or sharpness. The contrast of images of the zircons was adjusted to best display internal zoning.

dominant populations at *c.* 360 Ma ( $n=8$ ) and *c.* 320 Ma ( $n=6$ ), from the darker zoned mantles, and *c.* 100 Ma ( $n=4$ ) from the bright rims (Fig. 7). The Cretaceous age group at *c.* 100 Ma is interpreted to record the Cretaceous metamorphic overprint, whereas the older age groups probably represent the Ford Granodiorite suite protolith age and the effects of Carboniferous recrystallization, respectively.

#### *Cretaceous granites*

Granites from Mt Iphigene (Y1-IG070, Y1-IG052) and from Mt Avers (Y1-AW038, Y1-AE033, 10CY-039, Y1-AE051, Y1-AE064) have zircons that are euhedral to anhedral with dark and generally unzoned cores mantled by bright oscillatory-zoned rims in CL images (Fig. 6, Table 1). LA-ICP-MS data from the bright rims yield weighted mean ages that range from *c.* 108 to *c.* 103 Ma (Fig. 7). High  $^{204}\text{Pb}$  in the dark cores prohibits the calculation of meaningful ages.

Zircons from three of these granites were also analysed using the SHRIMP. For sample Y1-IG070,

$^{206}\text{Pb}/^{238}\text{U}$  dates range from *c.* 115 to *c.* 104 Ma (with one date of *c.* 126 Ma); an older group defined an age of  $113.2 \pm 1.8$  Ma (Fig. 8;  $n=5$ ; MSWD = 1.3), whereas a younger group yielded an age of  $106.6 \pm 1.1$  Ma (Fig. 8;  $n=10$ ; MSWD = 1.7). The younger age is interpreted as the timing of crystallization, whereas the older age may represent grains scavenged during reworking of a slightly older Cretaceous component in the Fosdick complex, such as *c.* 115 Ma granites reported by Korhonen *et al.* (2010b) and McFadden *et al.* (2010a). For sample Y1-AW038,  $^{206}\text{Pb}/^{238}\text{U}$  dates range from *c.* 117 to *c.* 102 (excluding two dates of *c.* 326 and *c.* 143 Ma); a group of younger dates yield an age of  $103.0 \pm 1.1$  Ma (Fig. 8;  $n=4$ ; MSWD = 0.69), interpreted as the crystallization age of the granite. This age is younger than the LA-ICP-MS age (Fig. 7), which may have been affected by the larger laser spot size inadvertently sampling zircon from a slightly older Cretaceous component.

An additional granite from Mt Iphigene (Y1-IG062) yielded zircons that are zoned, and predominantly

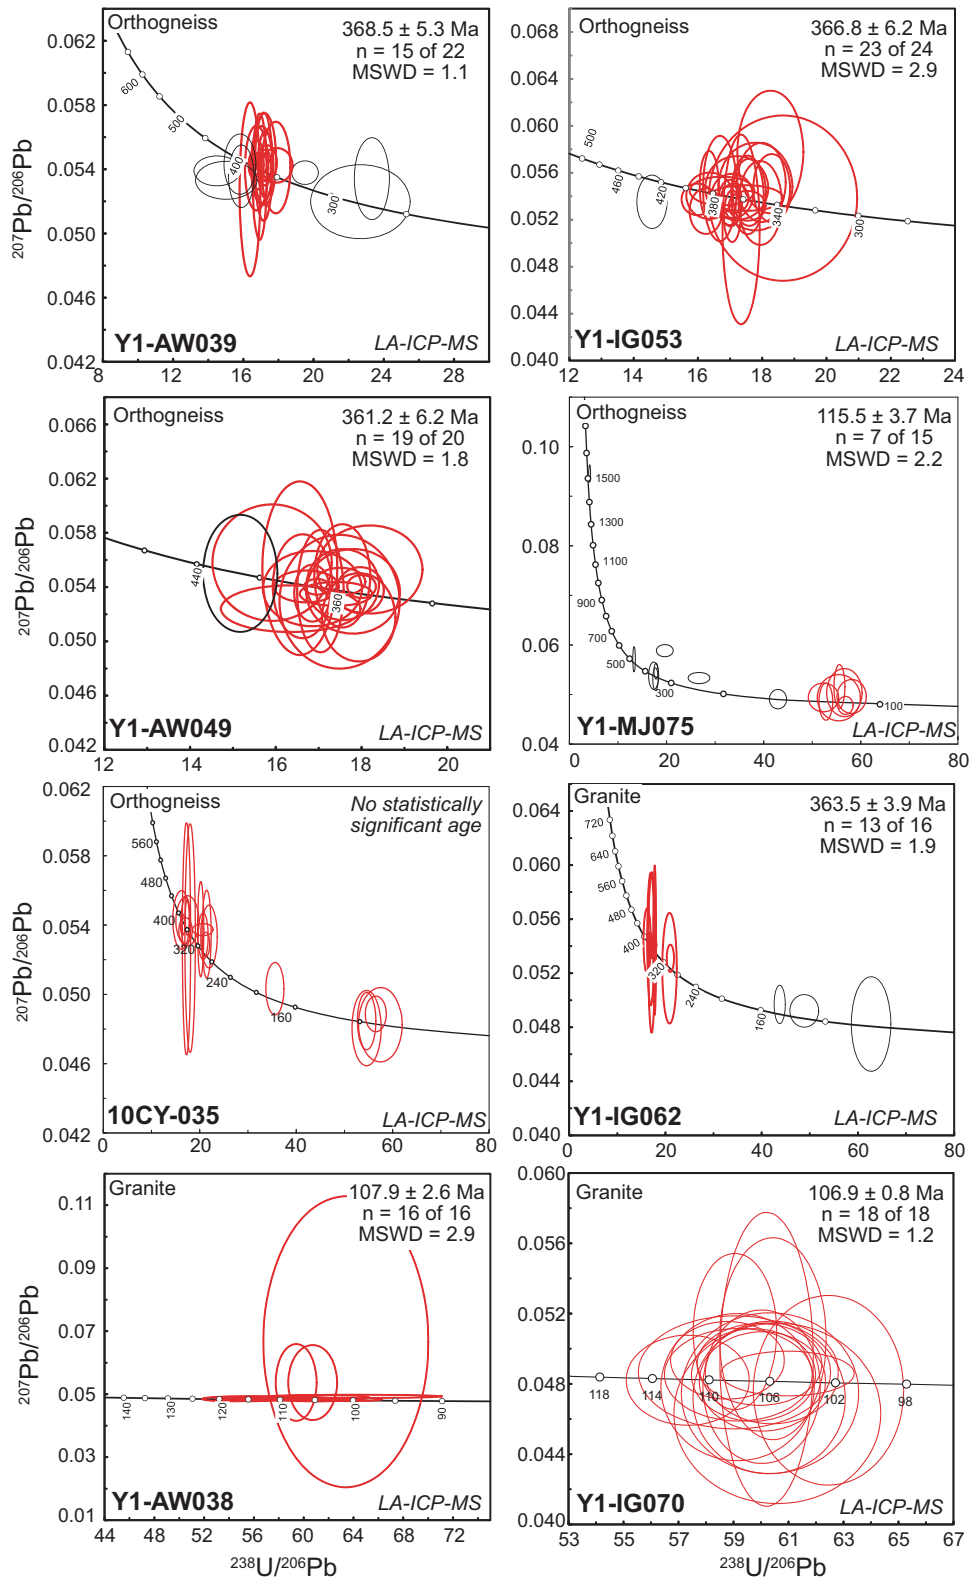

**Fig. 7.** U–Pb Tera–Wasserburg (1972) concordia plots of LA-ICP-MS zircon data for orthogneisses and granites. Data point error ellipses and age uncertainties are reported at  $2\sigma$  confidence.

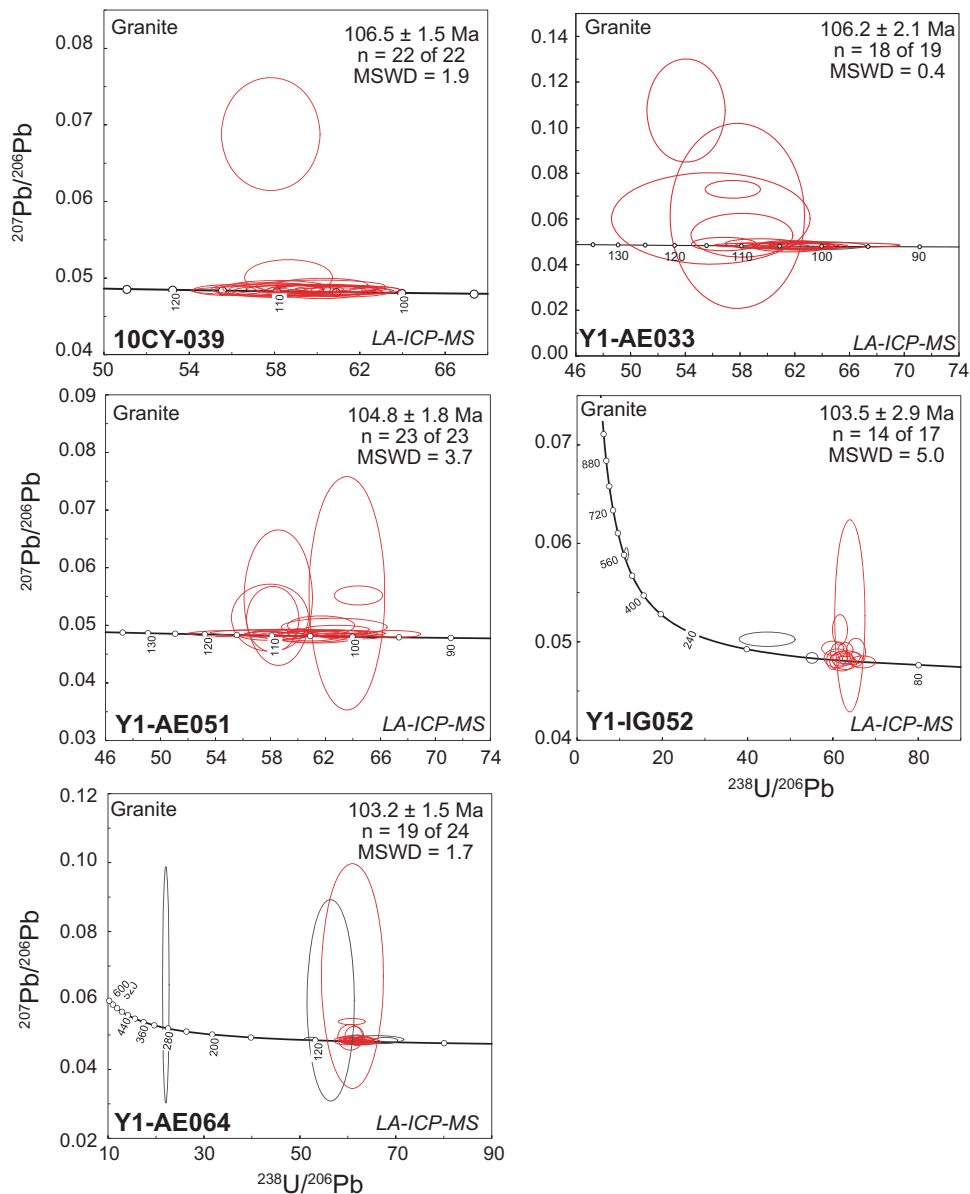

Fig. 7. Continued

prismatic and euhedral, although a few grains have bright, zoned cores in CL images that show evidence of recrystallization (Fig. 7). This sample contains both Devonian–Carboniferous and Cretaceous zircon age populations, with three Permian dates (Figs 7 and 8). The older population includes concordant dates from *c.* 393 to *c.* 324 Ma (LA-ICP-MS and SHRIMP); for the LA-ICP-MS data, 13 analyses define an age of  $363.5 \pm 3.9$  Ma (Fig. 7; MSWD = 1.9), which probably reflects a population of zircon grains inherited from the Ford Granodiorite suite. The younger population includes concordant dates from *c.* 114 to *c.* 98 Ma (LA-ICP-MS and SHRIMP); no statistically significant age can be calculated from these data. Based on field relations as well as the Cretaceous zircon dates, this granite is interpreted to be of Cretaceous age.

## GEOCHEMISTRY

### Major oxide, trace element and rare earth element chemistry

Major oxide, trace element and rare earth element (REE) analyses are presented in Table 2. These data are combined with published data (Weaver *et al.*, 1991, 1992; Pankhurst *et al.*, 1998; Tulloch *et al.*, 2009a; Korhonen *et al.*, 2010b; Yakymchuk *et al.*, 2015a) and shown as variation diagrams for major oxides and trace elements in Figs 9 and 10, and as chondrite-normalized REE patterns in Figs 11 and 12.

### Swanson Formation

Samples of the Swanson Formation ( $n=9$ ) have  $\text{SiO}_2$  contents ranging from 61 to 74 wt %; they are

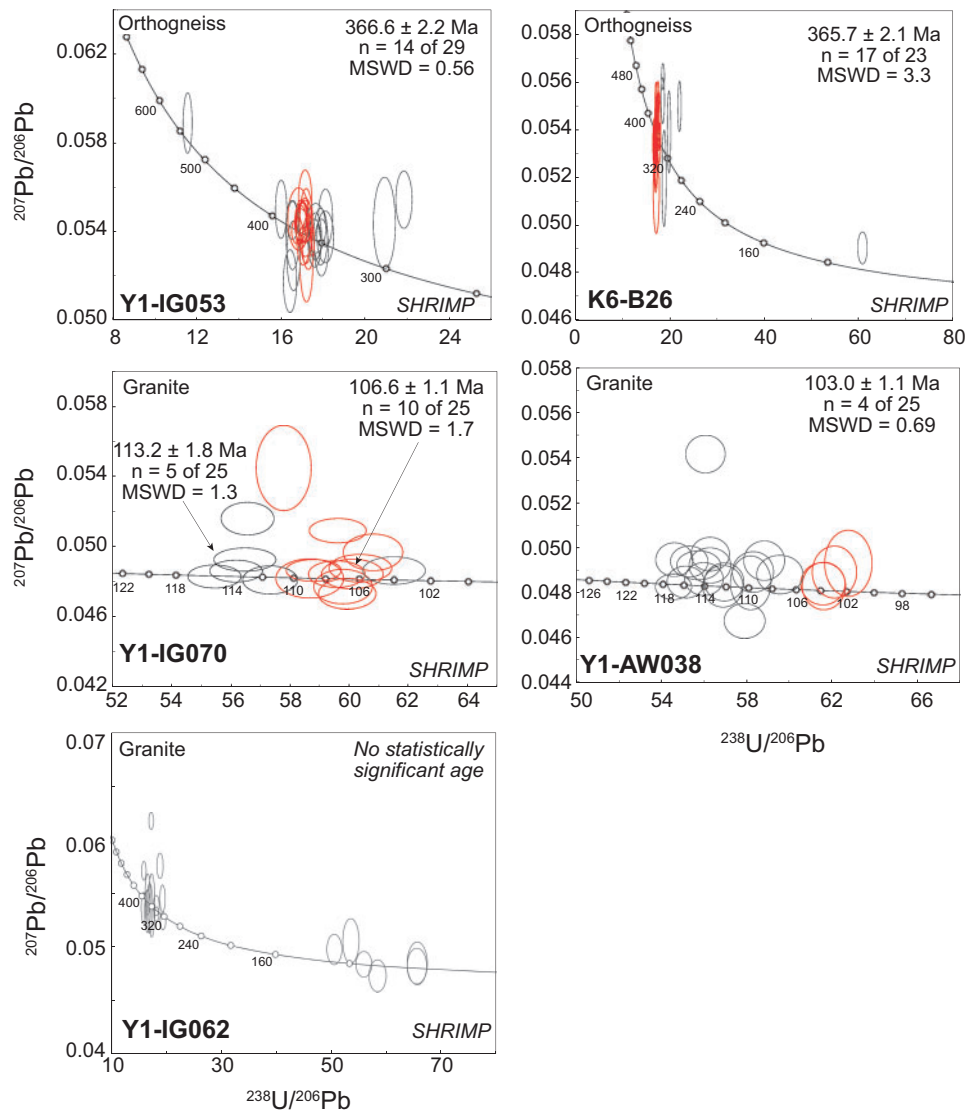

**Fig. 8.** U–Pb Tera–Wasserburg (1972) concordia plots of SHRIMP zircon data for orthogneisses and granites from the Fosdick Complex. Error ellipses and age uncertainties are reported at  $2\sigma$  confidence.

peraluminous with aluminum saturation indices ( $ASI = \text{molar } [Al_2O_3 / (CaO + Na_2O + K_2O)]$ ) of 1.28–2.00 (Fig. 9). With increasing  $SiO_2$ ,  $CaO$ ,  $Na_2O$  and  $P_2O_5$  remain relatively constant, whereas  $Al_2O_3$ ,  $FeO^* + MgO + TiO_2$  and  $K_2O$  decrease (Fig. 9). With the exception of U, Zr and La, which are positively correlated with increasing  $SiO_2$  (Fig. 10), and Rb and Rb/Sr, which are slightly negatively correlated with increasing  $SiO_2$  (Fig. 10), trace element concentrations remain relatively constant (Fig. 10). The Swanson Formation exhibits a narrow range of REE abundances and smooth normalized REE patterns (Fig. 11) that are convex for the light REE (LREE; La–Sm), with  $La_N/Lu_N$  of 8.64–10.2 and moderate negative Eu anomalies ( $Eu_N/Eu_N^* = 0.62–0.70$ ).

#### Ford Granodiorite suite

Samples of the Ford Granodiorite suite ( $n = 24$ ) have  $SiO_2$  contents ranging from 64 to 76 wt % (Fig. 9); they

are metaluminous to peraluminous, with  $ASI = 0.90–1.12$  (Fig. 9). With increasing  $SiO_2$ ,  $Al_2O_3$ ,  $FeO^* + MgO + TiO_2$ ,  $CaO$ ,  $P_2O_5$ , Ba, U, Sr and Zr generally decrease,  $Na_2O$ , La and Th remain relatively constant, and  $K_2O$ , Rb and Rb/Sr tend to increase (Figs 9 and 10). These rocks have a wide range of REE abundances, smooth to convex LREE patterns and smooth to concave-up heavy REE (HREE; Gd–Lu) patterns (Fig. 11),  $La_N/Lu_N$  of 2.3–9.92 and variable negative Eu anomalies ( $Eu_N/Eu_N^* = 0.31–0.85$ ).

#### The Fosdick complex

*Paragneisses and orthogneisses.* Paragneisses have major oxide and trace element abundances, and geochemical trends, that are similar to those for the Swanson Formation, although with more variability (Figs 9 and 10). The aluminum saturation indices and Rb/Sr ratios tend to be higher than those of the Swanson Formation, whereas  $CaO$ ,  $P_2O_5$  and Sr tend to be lower. One biotite-rich

**Table 2:** Major element, trace element and REE concentrations

| Rock type:                     | Paragneiss |          |          |          |          |          |          |          |
|--------------------------------|------------|----------|----------|----------|----------|----------|----------|----------|
| Sample:                        | 10CY-010   | 10CY-015 | 10CY-021 | 10CY-023 | 10CY-033 | 10CY-041 | Y1-BB013 | Y1-CB080 |
| <i>wt %</i>                    |            |          |          |          |          |          |          |          |
| SiO <sub>2</sub>               | 61.55      | 68.82    | 67.40    | 66.51    | 67.85    | 67.32    | 60.89    | 70.39    |
| TiO <sub>2</sub>               | 0.94       | 0.81     | 0.94     | 1.05     | 0.76     | 0.77     | 0.85     | 0.76     |
| Al <sub>2</sub> O <sub>3</sub> | 17.54      | 14.67    | 14.56    | 14.76    | 14.39    | 14.26    | 19.04    | 13.15    |
| Fe <sub>2</sub> O <sub>3</sub> | 1.32       | 1.24     | 0.76     | 1.06     | 1.36     | 1.08     | 1.21     | 0.67     |
| FeO                            | 6.05       | 4.55     | 5.50     | 5.87     | 4.21     | 4.61     | 5.87     | 5.04     |
| MnO                            | 0.09       | 0.05     | 0.07     | 0.08     | 0.08     | 0.05     | 0.07     | 0.08     |
| MgO                            | 3.71       | 2.76     | 3.26     | 3.59     | 2.74     | 2.89     | 3.90     | 3.00     |
| CaO                            | 0.91       | 0.82     | 1.31     | 0.71     | 1.37     | 1.75     | 0.93     | 1.75     |
| Na <sub>2</sub> O              | 1.91       | 1.64     | 1.81     | 0.99     | 2.03     | 2.55     | 1.33     | 1.85     |
| K <sub>2</sub> O               | 3.98       | 3.05     | 3.31     | 3.52     | 3.60     | 3.69     | 5.23     | 2.61     |
| P <sub>2</sub> O <sub>5</sub>  | 0.13       | 0.06     | 0.14     | 0.08     | 0.13     | 0.14     | 0.15     | 0.19     |
| LOI                            | 2.21       | 1.77     | 1.50     | 1.90     | 1.85     | 1.18     | 2.65     | 1.69     |
| Total                          | 100.34     | 100.24   | 100.56   | 100.12   | 100.37   | 100.29   | 100.12   | 100.05   |
| <i>ppm (XRF)</i>               |            |          |          |          |          |          |          |          |
| Rb                             | 276        | 247      | 198      | 228      | 201      | 188      | 299      | 141      |
| Sr                             | 106        | 66       | 133      | 80       | 126      | 161      | 135      | 152      |
| Y                              | 40         | 29       | 34       | 37       | 33       | 33       | 35       | 29       |
| Zr                             | 218        | 245      | 253      | 232      | 200      | 193      | 140      | 214      |
| V                              | 138        | 113      | 127      | 135      | 110      | 110      | 121      | 115      |
| Ni                             | 76         | 50       | 51       | 61       | 51       | 51       | 54       | 53       |
| Cr                             | 188        | 139      | 141      | 159      | 141      | 129      | 120      | 118      |
| Nb                             | 22         | 32       | 19       | 28       | 22       | 15       | 22       | 17       |
| Ga                             | 26         | 28       | 22       | 27       | 23       | 20       | 29       | 20       |
| Cu                             | 43         | 15       | 13       | 5        | 18       | 10       | 11       | 14       |
| Zn                             | 138        | 141      | 114      | 138      | 107      | 110      | 129      | 100      |
| Co                             | 28         | 21       | 22       | 27       | 20       | 20       | 23       | 22       |
| Ba                             | 682        | 306      | 399      | 373      | 428      | 456      | 901      | 427      |
| La                             | 28         | 28       | 28       | 32       | 22       | 26       | 28       | 26       |
| Ce                             | 74         | 57       | 65       | 75       | 54       | 54       | 72       | 68       |
| U                              | 3.4        | 5.6      | 1.2      | 2.6      | 3.8      | 2.3      | 2.3      | 2.1      |
| Th                             | 21         | 25       | 19       | 24       | 16       | 15       | 14       | 18       |
| Sc                             | 18         | 15       | 17       | 13       | 16       | 14       | 16       | 15       |
| Pb                             | <1         | <1       | <1       | <1       | <1       | <1       | 18       | 14       |
| <i>ppm (ICP-MS)</i>            |            |          |          |          |          |          |          |          |
| Sc                             | 18.4       | 13.8     | —        | 16.7     | 13.6     | 14.2     | 16.6     | 13.4     |
| Y                              | 40.5       | 34.4     | —        | 45.2     | 28.0     | 34.4     | 23.9     | 25.9     |
| La                             | 57.1       | 47.8     | —        | 68.7     | 43.9     | 35.6     | 41.5     | 48.6     |
| Ce                             | 114        | 97.0     | —        | 140      | 91.1     | 72.7     | 83.7     | 98.4     |
| Pr                             | 13.5       | 11.3     | —        | 16.5     | 10.7     | 8.72     | 9.58     | 11.5     |
| Nd                             | 51.6       | 43.1     | —        | 63.2     | 40.6     | 33.1     | 37.5     | 44.0     |
| Sm                             | 10.3       | 8.72     | —        | 12.8     | 7.96     | 6.89     | 7.61     | 8.56     |
| Eu                             | 1.60       | 0.98     | —        | 1.09     | 1.13     | 1.22     | 1.41     | 1.31     |
| Gd                             | 8.07       | 6.66     | —        | 9.31     | 5.79     | 5.65     | 5.75     | 6.35     |
| Tb                             | 1.33       | 1.11     | —        | 1.45     | 0.94     | 0.99     | 0.90     | 0.98     |
| Dy                             | 7.36       | 6.11     | —        | 8.19     | 5.21     | 5.90     | 4.76     | 5.19     |
| Ho                             | 1.47       | 1.17     | —        | 1.66     | 0.99     | 1.23     | 0.87     | 0.93     |
| Er                             | 3.90       | 3.07     | —        | 4.70     | 2.56     | 3.43     | 2.12     | 2.24     |
| Tm                             | 0.55       | 0.43     | —        | 0.70     | 0.36     | 0.50     | 0.27     | 0.29     |
| Yb                             | 3.31       | 2.64     | —        | 4.47     | 2.17     | 3.14     | 1.56     | 1.73     |
| Lu                             | 0.43       | 0.35     | —        | 0.62     | 0.28     | 0.43     | 0.20     | 0.23     |

(continued)

paragneiss sample, Y1-IG057, has 42 wt % SiO<sub>2</sub>, an ASI value of 3.13 and higher FeO\* + MgO + TiO<sub>2</sub>, Al<sub>2</sub>O<sub>3</sub>, Rb, Rb/Sr and Th, and lower CaO, Na<sub>2</sub>O and Sr than the other samples. The paragneisses have a wider range of REE concentrations than the Swanson Formation, but otherwise show similar chondrite-normalized REE patterns (Fig. 11), with La<sub>N</sub>/Lu<sub>N</sub> of 6.3–22.2 and variable negative Eu anomalies (Eu<sub>N</sub>/Eu<sub>N</sub>\* = 0.17–0.90). Sample Y1-IG057 has elevated HREE compared with the other samples.

Orthogneisses have major oxide and trace element abundances and trends that are consistent with a Ford Granodiorite suite parentage (Figs 9 and 10). However, the Al<sub>2</sub>O<sub>3</sub> contents and ASI of the orthogneisses are slightly higher, whereas Th is lower (Figs 9 and 10); K<sub>2</sub>O is lower and P<sub>2</sub>O<sub>5</sub> higher at low SiO<sub>2</sub> (Fig. 9). The orthogneisses have a wider range of REE concentrations than the Ford Granodiorite suite, with La<sub>N</sub>/Lu<sub>N</sub> of 7.7–116.8, more variability in the HREE patterns (Fig.

Table 2: Continued

| Rock type:                     | Paragneiss |          |          |          | Orthogneiss |          |          |          |
|--------------------------------|------------|----------|----------|----------|-------------|----------|----------|----------|
| Sample:                        | Y1-IG057   | Y1-IG061 | Y1-LH077 | Y1-MJ074 | 10CY-035    | Y1-AW039 | Y1-AW049 | Y1-IG053 |
| <i>wt %</i>                    |            |          |          |          |             |          |          |          |
| SiO <sub>2</sub>               | 42.01      | 71.00    | 69.59    | 68.37    | 74.19       | 67.82    | 64.19    | 65.51    |
| TiO <sub>2</sub>               | 1.57       | 0.68     | 0.76     | 0.74     | 0.08        | 0.76     | 0.92     | 0.89     |
| Al <sub>2</sub> O <sub>3</sub> | 23.10      | 14.34    | 13.58    | 15.71    | 14.29       | 15.85    | 16.48    | 16.60    |
| Fe <sub>2</sub> O <sub>3</sub> | 3.89       | 0.94     | 1.06     | 1.00     | 0.06        | 0.91     | 1.65     | 1.03     |
| FeO                            | 12.78      | 4.34     | 4.17     | 4.53     | 0.50        | 3.42     | 3.70     | 3.86     |
| MnO                            | 0.44       | 0.09     | 0.04     | 0.09     | 0.01        | 0.08     | 0.07     | 0.07     |
| MgO                            | 7.74       | 2.45     | 2.90     | 2.75     | 0.23        | 1.71     | 1.95     | 2.02     |
| CaO                            | 0.43       | 1.17     | 2.22     | 0.85     | 0.89        | 2.86     | 3.62     | 3.95     |
| Na <sub>2</sub> O              | 0.37       | 1.43     | 2.21     | 1.69     | 2.43        | 4.17     | 4.09     | 3.40     |
| K <sub>2</sub> O               | 5.54       | 3.42     | 2.89     | 3.92     | 7.22        | 2.23     | 2.17     | 2.20     |
| P <sub>2</sub> O <sub>5</sub>  | 0.15       | 0.19     | 0.18     | 0.14     | 0.08        | 0.31     | 0.29     | 0.30     |
| LOI                            | 3.49       | 2.22     | 1.42     | 2.30     | 0.43        | 1.18     | 1.08     | 1.01     |
| Total                          | 99.44      | 100.53   | 100.06   | 100.29   | 100.04      | 100.50   | 99.54    | 100.26   |
| <i>ppm (XRF)</i>               |            |          |          |          |             |          |          |          |
| Rb                             | 394        | 176      | 158      | 201      | 201         | 149      | 131      | 128      |
| Sr                             | 18         | 157      | 147      | 151      | 264         | 186      | 291      | 280      |
| Y                              | 91         | 38       | 32       | 31       | 5.9         | 31       | 16       | 25       |
| Zr                             | 155        | 177      | 215      | 166      | 93          | 198      | 260      | 191      |
| V                              | 222        | 95       | 103      | 105      | 15          | 93       | 101      | 102      |
| Ni                             | 90         | 55       | 49       | 55       | 4           | 14       | 12       | 12       |
| Cr                             | 166        | 98       | 128      | 107      | 24          | 59       | 61       | 65       |
| Nb                             | 39         | 13       | 15       | 17       | 3           | 20       | 17       | 14       |
| Ga                             | 39         | 19       | 19       | 22       | 15          | 24       | 23       | 23       |
| Cu                             | 69         | 16       | 5        | 7        | 3           | 10       | 5        | 17       |
| Zn                             | 296        | 81       | 102      | 100      | 14          | 74       | 88       | 78       |
| Co                             | 51         | 18       | 18       | 19       | <1          | 14       | 17       | 16       |
| Ba                             | 262        | 822      | 459      | 875      | 963         | 267      | 388      | 486      |
| La                             | 16         | 25       | 23       | 26       | 19          | 23       | 28       | 18       |
| Ce                             | 53         | 60       | 59       | 63       | 32          | 49       | 60       | 38       |
| U                              | 1.2        | 2.6      | 2.2      | 4.3      | 1.9         | 3.9      | 2.1      | 2.9      |
| Th                             | 34         | 14       | 17       | 11       | 6.8         | 8.0      | 6.7      | 1.5      |
| Sc                             | 41         | 11       | 14       | 14       | <1          | 14       | 16       | 16       |
| Pb                             | <1         | 14       | 20       | 22       | 47          | 2        | 14       | 15       |
| <i>ppm (ICP-MS)</i>            |            |          |          |          |             |          |          |          |
| Sc                             | 58.17      | 12.59    | 12.49    | 10.88    | 1.46        | 13.92    | 14.80    | 14.76    |
| Y                              | 99.2       | 34.3     | 31.5     | 21.8     | 7.83        | 33.7     | 15.7     | 26.0     |
| La                             | 68.0       | 28.1     | 45.1     | 35.9     | 14.7        | 33.4     | 43.5     | 24.5     |
| Ce                             | 138        | 57.9     | 91.9     | 72.7     | 30.1        | 70.3     | 89.2     | 52.5     |
| Pr                             | 16.2       | 6.87     | 10.8     | 8.57     | 3.74        | 8.94     | 10.6     | 6.89     |
| Nd                             | 60.7       | 26.6     | 41.6     | 33.2     | 13.8        | 34.8     | 38.3     | 27.7     |
| Sm                             | 12.0       | 5.54     | 8.38     | 6.66     | 2.95        | 7.56     | 6.55     | 5.82     |
| Eu                             | 0.63       | 1.53     | 1.58     | 1.34     | 1.35        | 1.28     | 1.28     | 1.63     |
| Gd                             | 10.1       | 4.62     | 6.54     | 4.97     | 2.45        | 7.09     | 5.44     | 5.52     |
| Tb                             | 2.16       | 0.84     | 1.06     | 0.78     | 0.37        | 1.23     | 0.77     | 0.95     |
| Dy                             | 16.0       | 5.41     | 5.84     | 4.21     | 1.71        | 6.76     | 3.67     | 5.33     |
| Ho                             | 3.58       | 1.20     | 1.11     | 0.79     | 0.28        | 1.22     | 0.61     | 0.98     |
| Er                             | 9.84       | 3.55     | 2.82     | 2.04     | 0.73        | 3.38     | 1.46     | 2.63     |
| Tm                             | 1.40       | 0.54     | 0.37     | 0.29     | 0.11        | 0.52     | 0.19     | 0.36     |
| Yb                             | 8.36       | 3.48     | 2.18     | 1.74     | 0.73        | 3.10     | 1.07     | 2.01     |
| Lu                             | 1.09       | 0.46     | 0.28     | 0.23     | 0.12        | 0.45     | 0.17     | 0.29     |

(continued)

11), and, with one exception (10CY-035,  $Eu_N/Eu_N^* = 1.48$ ), negative Eu anomalies ( $Eu_N/Eu_N^* = 0.33-0.96$ ).

**Cretaceous granites.** The granites have a limited range of silica contents (70–76 wt %), with ASI values similar to those of the orthogneisses. Al<sub>2</sub>O<sub>3</sub>, FeO\* + MgO + TiO<sub>2</sub>, Rb, Rb/Sr, Zr, La and Th are generally negatively correlated with increasing SiO<sub>2</sub>, whereas K<sub>2</sub>O increases with increasing SiO<sub>2</sub> except for two high-

silica granites (Figs 9 and 10). CaO, Na<sub>2</sub>O, P<sub>2</sub>O<sub>5</sub>, Ba, U and Sr show no clear trend, although Ba and Sr are highly variable (Figs 9 and 10). For major elements, there is no discernible difference between the garnet-present and the garnet-absent variants. However, the garnet-present granites generally have higher  $\sum$ HREE than the garnet-absent granites (Fig. 10). Although variable, decreasing Zr is correlated with decreasing  $\sum$ HREE, particularly in the garnet-absent granites, P<sub>2</sub>O<sub>5</sub>



Table 2: Continued

| Rock type:                     | Orthogneiss | Cretaceous granite |          |           |          |          |          |          |
|--------------------------------|-------------|--------------------|----------|-----------|----------|----------|----------|----------|
| Sample:                        | Y1-MJ075    | 10CY-039           | Y1-IG062 | C6-AW86-1 | Y1-AE051 | Y1-AE064 | Y1-IG052 | Y1-IG070 |
| <i>wt %</i>                    |             |                    |          |           |          |          |          |          |
| SiO <sub>2</sub>               | 72.84       | 73.95              | 75.60    | 75.85     | 76.08    | 75.01    | 75.33    | 77.50    |
| TiO <sub>2</sub>               | 0.29        | 0.04               | 0.01     | 0.08      | 0.02     | 0.04     | 0.02     | 0.01     |
| Al <sub>2</sub> O <sub>3</sub> | 14.80       | 14.85              | 13.97    | 13.47     | 14.62    | 14.64    | 14.17    | 13.85    |
| Fe <sub>2</sub> O <sub>3</sub> | 0.28        | 0.08               | 0.03     | 0.05      | 0.11     | 0.22     | 0.11     | 0.03     |
| FeO                            | 1.49        | 0.22               | 0.76     | 0.43      | 0.39     | 0.40     | 0.83     | 0.08     |
| MnO                            | 0.03        | 0.01               | 0.06     | 0.01      | 0.03     | 0.05     | 0.07     | 0.01     |
| MgO                            | 0.63        | 0.15               | 0.17     | 0.22      | 0.14     | 0.18     | 0.20     | 0.00     |
| CaO                            | 1.30        | 0.89               | 1.05     | 1.02      | 2.50     | 1.65     | 1.22     | 1.98     |
| Na <sub>2</sub> O              | 3.44        | 2.80               | 2.77     | 2.60      | 3.60     | 3.13     | 2.74     | 3.66     |
| K <sub>2</sub> O               | 5.03        | 6.81               | 5.80     | 5.93      | 2.84     | 5.15     | 5.43     | 3.21     |
| P <sub>2</sub> O <sub>5</sub>  | 0.16        | 0.11               | 0.09     | 0.05      | 0.10     | 0.06     | 0.09     | 0.08     |
| LOI                            | 0.69        | 0.61               | 0.58     | 0.39      | 0.65     | 0.48     | 0.48     | 0.33     |
| Total                          | 100.46      | 99.93              | 100.39   | 99.76     | 100.47   | 100.57   | 100.30   | 100.42   |
| <i>ppm (XRF)</i>               |             |                    |          |           |          |          |          |          |
| Rb                             | 236         | 182                | 167      | 183       | 80       | 147      | 137      | 91.6     |
| Sr                             | 158         | 236                | 225      | 321       | 209      | 210      | 250      | 224      |
| Y                              | 13          | 4.8                | 27.4     | 3         | 14.7     | 10.3     | 15.5     | 4        |
| Zr                             | 261         | 39                 | 76       | 122       | 56       | 73       | 57       | 28       |
| V                              | 26          | 5                  | <1       | 12        | 1        | 6        | 6        | 1        |
| Ni                             | 6           | 6                  | 2        | 2         | 2        | 3        | 2        | 1        |
| Cr                             | 28          | 35                 | 21       | 11        | 33       | 21       | 18       | 19       |
| Nb                             | 17.2        | 2                  | 1.2      | 2         | 1        | 2.1      | 0.9      | 0.8      |
| Ga                             | 20.8        | 14.9               | 14.2     | 15        | 17.4     | 15.9     | 14.1     | 15.8     |
| Cu                             | 4           | 4                  | 7        | 3         | 2        | 4        | 7        | 25       |
| Zn                             | 41          | 11                 | 11       | 13        | 9        | 13       | 10       | 7        |
| Co                             | 1           | <1                 | <1       | <1        | <1       | <1       | <1       | <1       |
| Ba                             | 945         | 895                | 632      | 803       | 402      | 515      | 1073     | 434      |
| La                             | 51          | 11                 | 19       | 25        | 19       | 26       | 17       | 13       |
| Ce                             | 122         | 13                 | 37       | 53        | 23       | 39       | 20       | 17       |
| U                              | 8.4         | 1.1                | 3.1      | 2         | 3        | 1.7      | <0.5     | 1.1      |
| Th                             | 17.1        | <0.5               | 3.2      | 7.4       | <0.5     | 5.9      | <0.5     | <0.5     |
| Sc                             | 5           | <1                 | 4        | <1        | 4        | 2        | 3        | 1        |
| Pb                             | 38          | 65                 | 52       | 36        | 46       | 47       | 62       | 43       |
| <i>ppm (ICP-MS)</i>            |             |                    |          |           |          |          |          |          |
| Sc                             | 5.03        | 0.79               | 7.32     | 1.11      | 4.51     | 3.96     | 6.40     | 0.51     |
| Y                              | 14.4        | 5.63               | 24.9     | 3.50      | 12.7     | 11.9     | 17.8     | 2.95     |
| La                             | 93.4        | 6.12               | 14.4     | 27.6      | 7.79     | 20.1     | 11.1     | 4.34     |
| Ce                             | 169         | 11.1               | 30.0     | 55.4      | 13.2     | 40.7     | 20.1     | 7.14     |
| Pr                             | 18.3        | 1.28               | 3.79     | 6.87      | 1.48     | 4.86     | 2.32     | 0.76     |
| Nd                             | 60.3        | 4.54               | 13.8     | 24.9      | 5.06     | 17.3     | 8.13     | 2.43     |
| Sm                             | 8.73        | 0.99               | 3.20     | 4.54      | 1.04     | 3.33     | 1.48     | 0.45     |
| Eu                             | 1.10        | 1.32               | 1.13     | 0.98      | 1.44     | 1.16     | 1.58     | 1.13     |
| Gd                             | 5.97        | 0.94               | 2.77     | 3.25      | 0.99     | 2.54     | 1.33     | 0.41     |
| Tb                             | 0.83        | 0.18               | 0.52     | 0.34      | 0.22     | 0.39     | 0.31     | 0.08     |
| Dy                             | 3.61        | 1.00               | 3.51     | 1.12      | 1.70     | 2.10     | 2.51     | 0.47     |
| Ho                             | 0.50        | 0.19               | 0.86     | 0.13      | 0.45     | 0.41     | 0.61     | 0.10     |
| Er                             | 1.04        | 0.52               | 3.31     | 0.26      | 1.73     | 1.43     | 2.30     | 0.33     |
| Tm                             | 0.12        | 0.08               | 0.65     | 0.03      | 0.33     | 0.30     | 0.48     | 0.06     |
| Yb                             | 0.63        | 0.45               | 4.95     | 0.21      | 2.36     | 2.51     | 3.80     | 0.45     |
| Lu                             | 0.08        | 0.07               | 0.84     | 0.03      | 0.39     | 0.46     | 0.62     | 0.08     |

(continued)

is negatively correlated with increasing  $\sum$ LREE, and decreasing Th is weakly correlated with decreasing  $\sum$ LREE (Fig. 10).

The granites have lower  $\sum$ REE relative to their potential sources. Garnet-absent granites generally have low to moderate negatively sloping normalized REE patterns ( $La_N/Lu_N$  of 5.88–25.6), whereas the garnet-present granites have flatter concave-up normalized REE patterns with rising convex HREE, as expected from the presence of garnet (Fig. 12). Four of

the garnet-absent granites have small negative Eu anomalies, one of which (C6-AW86-1) has a particularly steep normalized REE pattern ( $La_N/Lu_N=82.6$ ) showing strong depletion in the HREE with a concave-up slope (Fig. 12). However, a majority of the garnet-absent and all but one of the garnet-present granites have variable, typically moderate to large positive Eu anomalies ( $Eu_N/Eu_N^*=0.37$ – $10.3$ ); this variation is unrelated to SiO<sub>2</sub> content.

**Table 2:** Continued

| Rock type:                     | Cretaceous granite |          |
|--------------------------------|--------------------|----------|
| Sample:                        | Y1-AW038           | Y1-AE033 |
| <i>wt %</i>                    |                    |          |
| SiO <sub>2</sub>               | 71.16              | 74.06    |
| TiO <sub>2</sub>               | 0.03               | 0.10     |
| Al <sub>2</sub> O <sub>3</sub> | 16.02              | 15.58    |
| Fe <sub>2</sub> O <sub>3</sub> | 0.04               | 0.09     |
| FeO                            | 0.54               | 0.14     |
| MnO                            | 0.08               | 0.01     |
| MgO                            | 0.11               | 0.10     |
| CaO                            | 0.44               | 1.37     |
| Na <sub>2</sub> O              | 2.80               | 2.74     |
| K <sub>2</sub> O               | 8.89               | 5.91     |
| P <sub>2</sub> O <sub>5</sub>  | 0.07               | 0.11     |
| LOI                            | 0.47               | 0.62     |
| Total                          | 100.24             | 100.23   |
| <i>ppm (XRF)</i>               |                    |          |
| Rb                             | 284                | 178      |
| Sr                             | 167                | 194      |
| Y                              | 14.6               | 8.9      |
| Zr                             | 76                 | 23       |
| V                              | 5                  | 8        |
| Ni                             | 1                  | 1        |
| Cr                             | 14                 | 8        |
| Nb                             | 2.4                | 2.2      |
| Ga                             | 14.9               | 18.5     |
| Cu                             | 4                  | 3        |
| Zn                             | 13                 | 10       |
| Co                             | <1                 | <1       |
| Ba                             | 457                | 640      |
| La                             | 15                 | 21       |
| Ce                             | 13                 | 28       |
| U                              | 1.4                | 1.4      |
| Th                             | <0.5               | <0.5     |
| Sc                             | 3                  | 1        |
| Pb                             | 64                 | 58       |
| <i>ppm (ICP-MS)</i>            |                    |          |
| Sc                             | 3.57               | 1.04     |
| Y                              | 10.9               | 9.77     |
| La                             | 1.87               | 15.2     |
| Ce                             | 2.45               | 31.3     |
| Pr                             | 0.24               | 3.90     |
| Nd                             | 0.75               | 14.4     |
| Sm                             | 0.23               | 3.26     |
| Eu                             | 0.6                | 1.49     |
| Gd                             | 0.41               | 2.93     |
| Tb                             | 0.13               | 0.47     |
| Dy                             | 1.21               | 2.17     |
| Ho                             | 0.35               | 0.33     |
| Er                             | 1.51               | 0.79     |
| Tm                             | 0.34               | 0.10     |
| Yb                             | 2.87               | 0.57     |
| Lu                             | 0.53               | 0.08     |

### Sr and Nd isotope compositions

Nd and Sr isotope results for 20 samples are presented in Table 3 and are summarized, together with additional data from the literature, in Fig. 13. Although the Cretaceous metamorphism is the dominant anatectic event in the Fosdick complex, for completeness the Sr and Nd isotope compositions for the migmatitic gneisses are reported at 360 and 100 Ma in Table 3, but are plotted for only 100 Ma in Fig. 13.

### The Fosdick complex

*Migmatitic gneisses.* Paragneiss samples have  $^{87}\text{Sr}/^{86}\text{Sr}_{100\text{Ma}}$  values that vary from 0.71980 to 0.73344 and  $\varepsilon\text{Nd}_{100\text{Ma}}$  values that range from -10.5 to -8.7 (with one value of -13.1), generally consistent with values from the Swanson Formation (Fig. 13). Orthogneiss samples have  $^{87}\text{Sr}/^{86}\text{Sr}_{100\text{Ma}}$  values that vary from 0.71238 to 0.72501 and  $\varepsilon\text{Nd}_{100\text{Ma}}$  values that range from -6.8 to -3.6 (with one value of -11.2), generally consistent with values from the Ford Granodiorite suite.

*Cretaceous granites.* Granites within the Fosdick complex have  $^{87}\text{Sr}/^{86}\text{Sr}_{100\text{Ma}}$  ratios that vary from 0.71169 to 0.73900 and  $\varepsilon\text{Nd}_{100\text{Ma}}$  values that range from -8.0 to -3.9 (Fig. 13).

### Hf and O isotope compositions of zircon

Five samples were selected for Hf and O isotope analysis of zircon; the data are given in Table 4 and are summarized, together with an additional sample (C6-AW86-1, data from Yakymchuk *et al.*, 2013b), in Figs 14 and 15.

### Fosdick complex

*Orthogneiss.* Sample Y1-IG053 contains zircon with  $\varepsilon\text{Hf}_{360}$  values of -4.3 to -0.2,  $\delta^{18}\text{O}$  values of 8.3–9.3 (Fig. 14), and weighted means of  $-2.8 \pm 0.4$  and  $8.8 \pm 0.1$ , respectively ( $2\sigma$ ; 19 of 20). Sample K6-B26 contains zircon with  $\varepsilon\text{Hf}$  values of -4.2 to -0.6,  $\delta^{18}\text{O}$  values of 8.0–9.7 (Fig. 14), and weighted means of  $-2.1 \pm 0.4$  and  $8.6 \pm 0.2$ , respectively ( $2\sigma$ ; 18 of 19). A single Cretaceous age spot yields  $\varepsilon\text{Hf}_{100}$  and  $\delta^{18}\text{O}$  values of -6.1 and 9.8.

*Cretaceous granites.* Sample Y1-AW038 contains zircon with  $\varepsilon\text{Hf}_{100}$  values of -6.6 to -3.3,  $\delta^{18}\text{O}$  values of 8.8–9.9 (Fig. 15), and weighted means of  $-5.0 \pm 0.3$  and  $9.3 \pm 0.2$ , respectively ( $2\sigma$ ;  $n=18$ ). Sample Y1-IG070 contains zircon with  $\varepsilon\text{Hf}_{100}$  values of -7.1 to -4.0,  $\delta^{18}\text{O}$  values of 8.7–10.3 (Fig. 15), and weighted means of  $-5.3 \pm 0.5$  and  $9.4 \pm 0.3$ , respectively ( $2\sigma$ ;  $n=13$ ).

Sample Y1-IG062 contains both Devonian–Carboniferous and Cretaceous zircon (Fig. 15a). Devonian–Carboniferous zircon spots have  $\varepsilon\text{Hf}_{360}$  values of -5.9 to -1.9,  $\delta^{18}\text{O}$  values of 8.8–10.2, and weighted means of  $-3.1 \pm 0.6$  and  $9.4 \pm 0.2$ , respectively ( $2\sigma$ ; 12 of 13). Cretaceous zircon spots have  $\varepsilon\text{Hf}_{100}$  values of -7.3 to -1.7,  $\delta^{18}\text{O}$  values of 9.5–10.2, and weighted means of  $-4.2 \pm 1.4$  and  $9.8 \pm 0.2$ , respectively ( $2\sigma$ ;  $n=9$ ). Devonian–Carboniferous zircon  $\varepsilon\text{Hf}$  values recalculated to 100 Ma are -11.6 to -7.5, which is less radiogenic than most Cretaceous zircon. Furthermore, Cretaceous zircons generally have higher  $\delta^{18}\text{O}$  values than Devonian–Carboniferous zircons (Fig. 15a).

### PHASE EQUILIBRIA MODELLING OF SOURCE ROCKS

The migmatitic gneisses in the Fosdick complex show unambiguous evidence of partial melting and melt loss during the Cretaceous (Korhonen *et al.*, 2012;

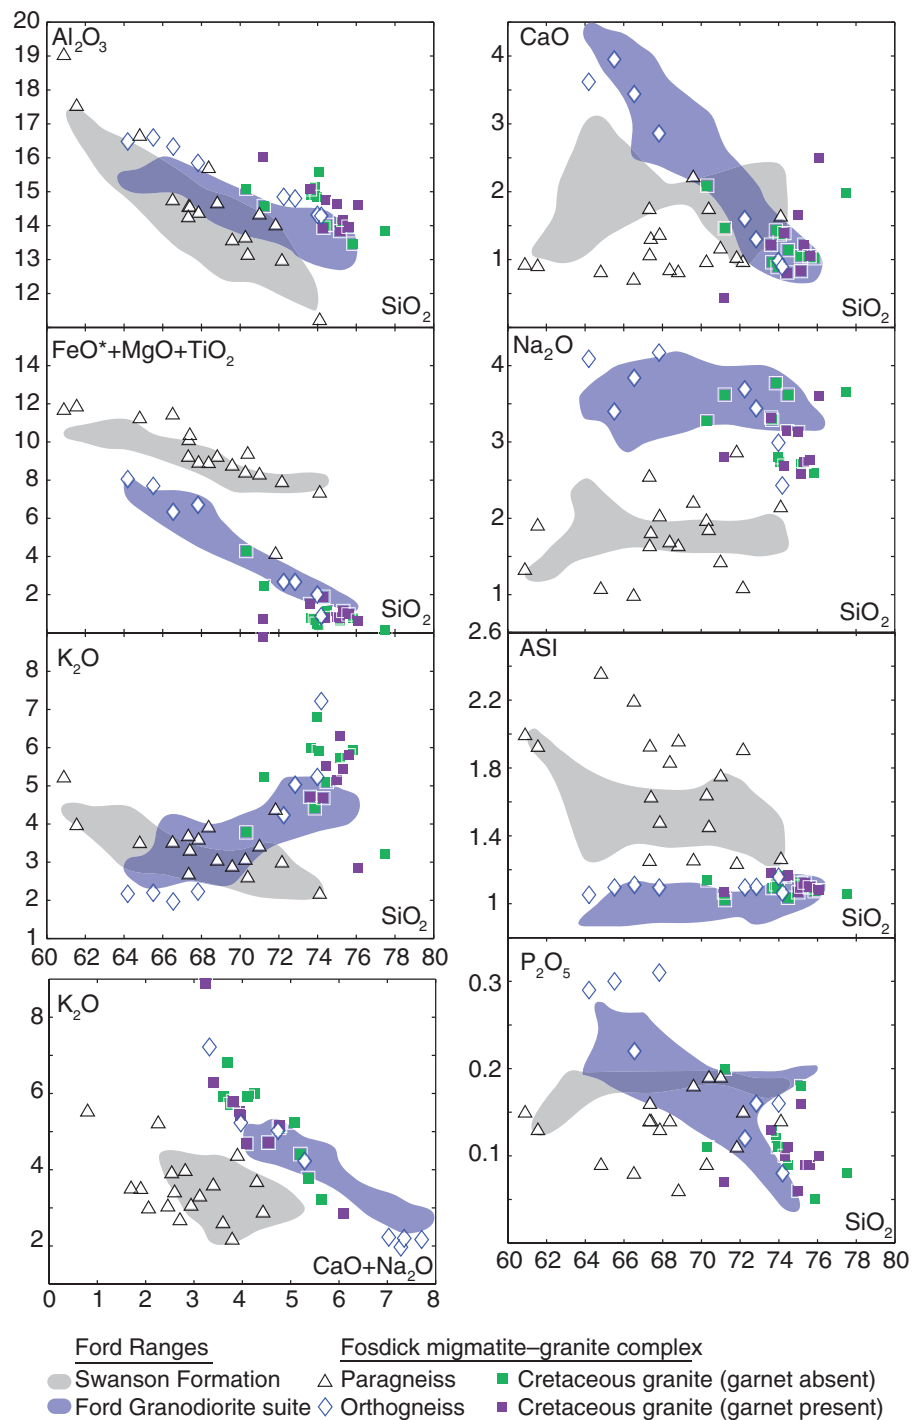

**Fig. 9.** Major oxide data for Swanson Formation ( $n=9$ ), Ford Granodiorite suite ( $n=25$ ), and Fossdick Complex paragneisses, orthogneisses and Cretaceous granites. The shaded fields for the Ford Granodiorite suite are based on the data from this study and data from Weaver *et al.* (1991, 1992), Pankhurst *et al.* (1998), Tulloch *et al.* (2009a) and Korhonen *et al.* (2010b). FeO\* represents total ferrous iron. Aluminum saturation index (ASI) = molar  $[Al_2O_3/(CaO + Na_2O + K_2O)]$ . Oxides are plotted as weight per cent.

Yakymchuk *et al.*, 2015b). However, it is likely that partial melting and melt loss also occurred during the Devonian–Carboniferous subduction-related metamorphism, at least in the Swanson Formation protoliths. Indeed, this is suggested by the occurrence of Carboniferous S-type granites south of the Fossdick complex (Tulloch *et al.*, 2009a). If we assume the

possibility of melt loss during the Devonian–Carboniferous metamorphism, it becomes unclear whether the paragneisses or the orthogneisses were more fertile during the Cretaceous event.

For the crustal level exposed in the Fossdick complex, previous forward modelling of phase equilibria for Swanson Formation and Ford Granodiorite suite

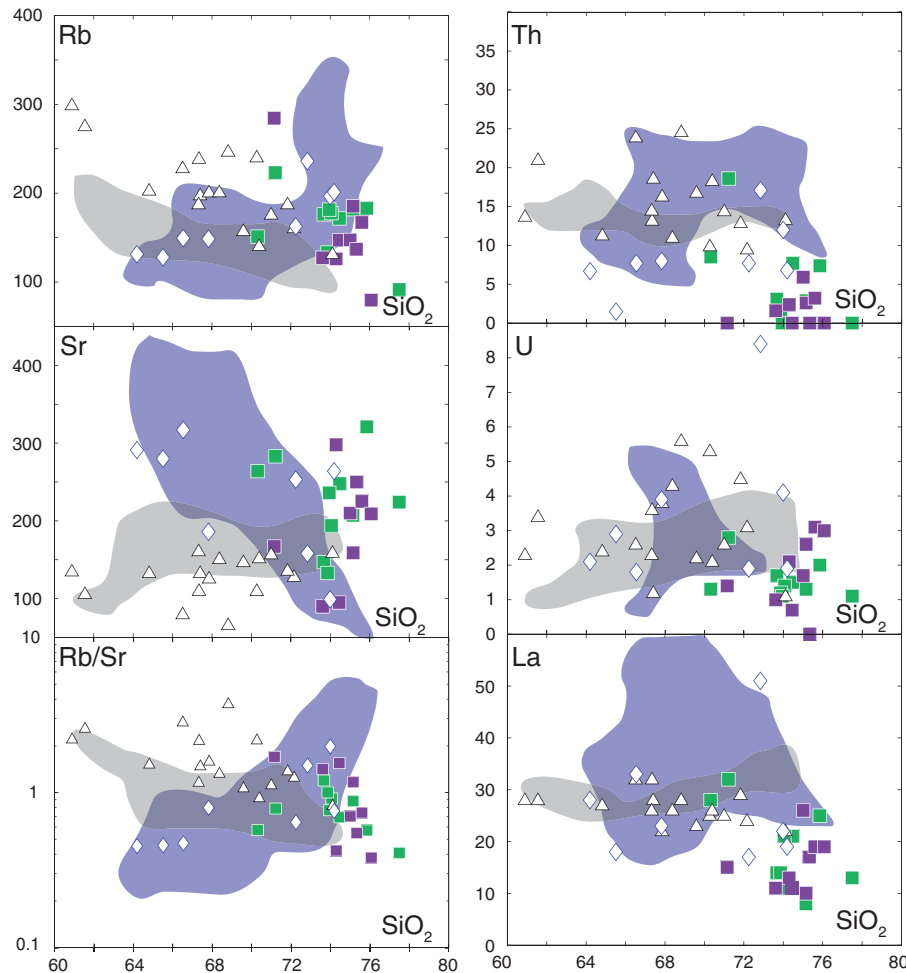

**Fig. 10.** Trace element data for Swanson Formation ( $n=9$ ), Ford Granodiorite suite ( $n=25$ ), and Fosdick Complex paragneisses, orthogneisses and Cretaceous granites. The fields for the Ford Granodiorite suite are based on the data from this study and data from Weaver *et al.* (1991, 1992), Pankhurst *et al.* (1998), Tulloch *et al.* (2009a), and Korhonen *et al.* (2010b). Trace element abundances are plotted as parts per million (ppm).

(continued)

compositions, the putative protoliths of the gneisses, suggested that the former could have produced up to 30 vol. % melt but the latter less than 5 vol. % melt at the peak of Cretaceous metamorphism (Korhonen *et al.*, 2010a). However, if some melt was generated and lost during the Devonian–Carboniferous subduction-related metamorphism, these estimates will be maxima. To assess the effect of the Devonian–Carboniferous metamorphism and melting on the fertility of the gneisses during the Cretaceous event we use phase equilibria forward modelling.

### Methods

Calculations were performed using THERMOCALC v.3.35 (Powell & Holland, 1988) and the internally consistent dataset of Holland & Powell (1998). Modelling was undertaken in the  $\text{Na}_2\text{O}-\text{CaO}-\text{K}_2\text{O}-\text{FeO}-\text{MgO}-\text{Al}_2\text{O}_3-\text{SiO}_2-\text{H}_2\text{O}-\text{TiO}_2-\text{Fe}_2\text{O}_3$  (NCKFMASHTO) chemical system.  $P$ - $T$  pseudosections were calculated for representative samples of the Swanson Formation (sample 10CY-002)

and the Ford Granodiorite suite [sample R7218 from Weaver *et al.* (1991)] from outside the Fosdick complex, and for a representative migmatitic paragneiss (sample 10CY-015) and orthogneiss (sample Y1-IG053) from inside the Fosdick complex. The FeO content of these samples was determined by  $\text{Fe}^{2+}$  titration and  $\text{Fe}_2\text{O}_3$  contents were calculated by difference. For sample R7218 (Ford Granodiorite Suite), 10% of the total iron is assumed to be ferric (Table 5). For the protolith samples (samples 10CY-002 and R7218), the amount of water in the bulk compositions was adjusted so that there was minimal ( $\sim 0.01$  mol %) free  $\text{H}_2\text{O}$  at the solidus at 0.7 GPa, which is consistent with fluid-absent conditions above the solidus (White & Powell, 2002; White *et al.*, 2005). If the actual prograde path crossed the solidus at lower or higher pressures, this approach would slightly overestimate or underestimate the quantity of melt produced, respectively. For the migmatitic gneisses (samples 10CY-015 and Y1-IG053), the amount of  $\text{H}_2\text{O}$  in the bulk compositions was adjusted from the

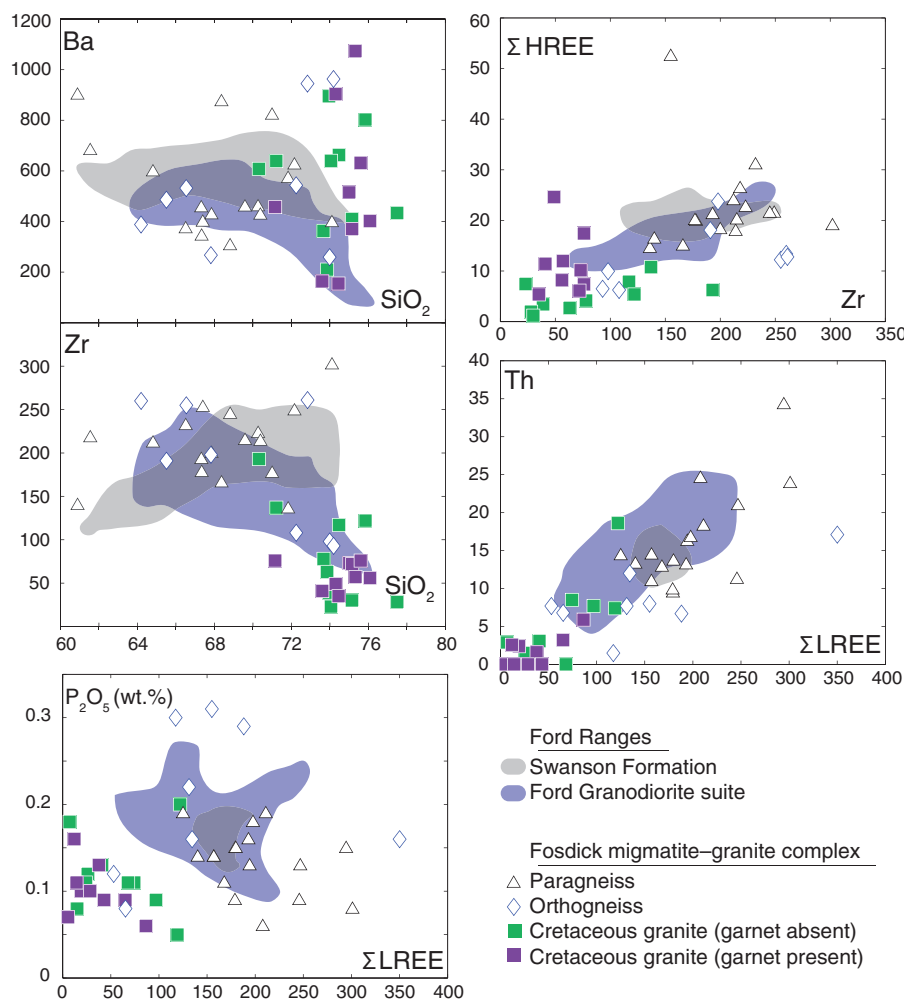

Fig. 10. Continued

measured loss on ignition value so that the observed mineral assemblage was stable just above the solidus, which reflects the conditions at which this assemblage was in equilibrium with the last remnants of melt (see White *et al.*, 2004; Diener *et al.*, 2008; Korhonen *et al.*, 2010a).

The phases considered are biotite (Bt), cordierite (Crd), diopside (Di), epidote (Ep), garnet (Grt), aqueous fluid (H<sub>2</sub>O), ilmenite (Ilm), K-feldspar (Kfs), kyanite (Ky), silicate liquid or melt (Liq), magnetite (Mag), muscovite (Ms), orthopyroxene (Opx), plagioclase (Pl), paragonite (Pg), quartz (Qtz), rutile (Rt), sillimanite (Sil), spinel (Spl) and titanite (Ttn). The activity–composition (*a*–*x*) models for the phases considered are as follows: biotite, garnet, and melt (White *et al.*, 2007); orthopyroxene and spinel–magnetite (White & Powell, 2002); cordierite and epidote (Holland & Powell, 1998); K-feldspar and plagioclase (Holland & Powell, 2003); white mica (Coggon & Holland, 2002); ilmenite–hematite (White *et al.*, 2000); clinopyroxene (Green *et al.*, 2007); hornblende (Diener *et al.*, 2007). Phases modelled as pure end-members are quartz, rutile, titanite, aqueous fluid (H<sub>2</sub>O), kyanite and sillimanite.

### Results of phase equilibria modelling

*P*–*T* pseudosections for the representative samples are shown in Fig. 16. These phase diagrams show the stable phase assemblage and the amount of melt [as mol % (~vol. %) isopleths] generated in a closed (undrained) system at *P*–*T* for each composition. Peak conditions for the Devonian–Carboniferous metamorphic event are estimated to have been 680–800°C at 0.60–0.95 GPa (Yakymchuk *et al.*, 2015b). At these *P*–*T* conditions, the Swanson Formation composition could have produced up to 10 mol % melt, but the Ford Granodiorite suite composition would have produced <1 mol % melt (Fig. 16a and b). Melt drainage from the suprasolidus crust is expected when the proportion of melt reaches ~7 vol. % (e.g. Rosenberg & Handy, 2005; Brown, 2010). Therefore, the Swanson Formation composition modelled was likely to have lost melt at least once during the Devonian–Carboniferous event, resulting in a less fertile composition for melting during the Cretaceous. Although there is variation in the fertility of the Swanson Formation, this confirms that the melt volumes predicted by Korhonen *et al.* (2010a) for the Cretaceous metamorphism must represent maxima. By

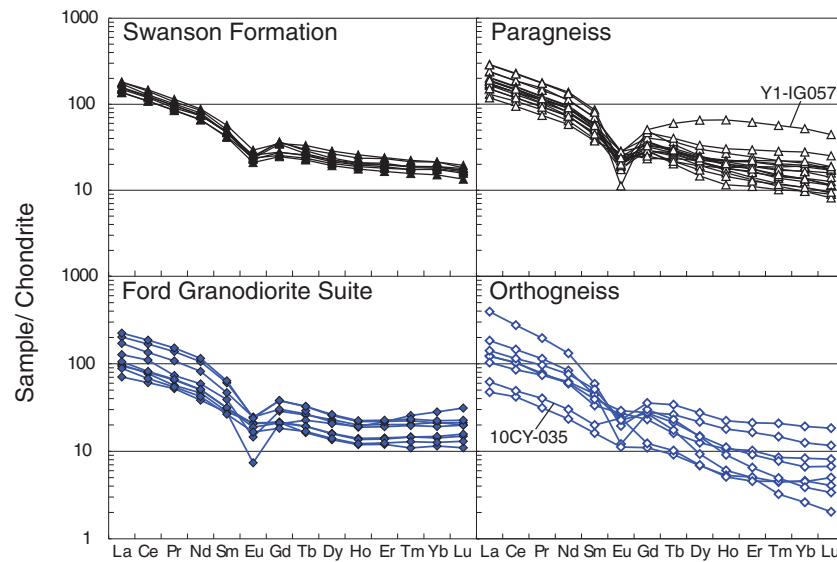

**Fig. 11.** Chondrite-normalized rare earth element (REE) patterns for paragneiss, orthogneiss and their putative protoliths. Data are from this study and *Korhonen et al. (2010b)*. Chondrite normalization values from *McDonough & Sun (1995)*.

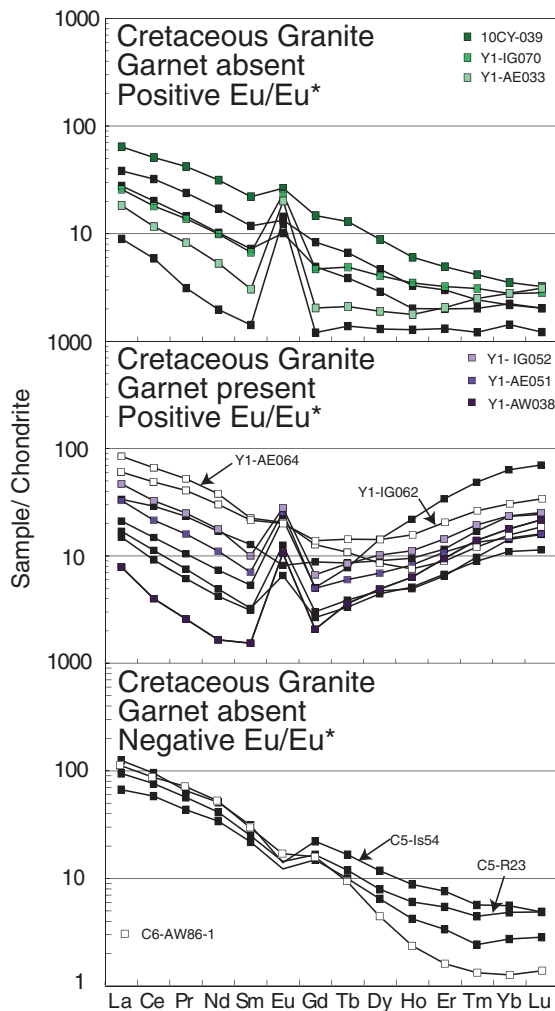

**Fig. 12.** Chondrite-normalized rare earth element (REE) patterns for Cretaceous granites from the Fostdick complex (data from this study and *Korhonen et al. (2010b)*). Chondrite normalization after *McDonough & Sun (1995)*.

contrast, the Ford Granodiorite suite is likely to have retained its original fertility through the Devonian–Carboniferous metamorphism and into the Cretaceous event.

Phase equilibria modelling of the residual gneisses (*Fig. 16c* and *d*) provides information about the amount of melt left in the source after loss along the Cretaceous prograde evolution path and throughout decompression to the final solidus assemblage at  $P$  of 0.75–0.60 GPa and  $T$  of 870–830°C (*Yakymchuk et al., 2015b*). The representative residual paragneiss is expected to have retained <2 vol. % melt at these  $P$ – $T$  conditions, whereas the orthogneiss could have retained up to 6 vol. % melt. However, it is clear from these  $P$ – $T$  pseudosections that greater volumes of melt were potentially available at higher  $P$ – $T$  conditions in the source beneath the Fostdick complex during the doming event, particularly in the orthogneiss composition.

The amount of leucosome and granite measured at outcrop in the migmatitic gneisses ranges from 40 to 70 vol. % (*Yakymchuk et al., 2013a*). Thus, even if the maximum of 30 vol. % melt was generated from the Swanson Formation (*Korhonen et al., 2010a*) at the depth of exposure during the Cretaceous, it is likely that a significant proportion of the leucosome and granite in the Fostdick complex was sourced from deeper in the crust where ambient temperatures were higher. This is consistent with geophysical surveys across the region, which show that the crust beneath the Fostdick complex is composed of rocks similar to the Ford Granodiorite suite and the Swanson Formation (*Ferraccioli et al., 2002; Luyendyk et al., 2003*).

Crustal thinning associated with doming increases the apparent thermal gradient. *Yakymchuk et al. (2013a)* suggested that the apparent thermal gradient in the Fostdick complex prior to doming was of the order of 770°C GPa<sup>-1</sup>, whereas the apparent thermal gradient

**Table 3:** Sr–Nd isotope compositions

| Sample no.:                               | Paragneiss |          |          |          |          |          | Orthogneiss |          |          |          |  |  |
|-------------------------------------------|------------|----------|----------|----------|----------|----------|-------------|----------|----------|----------|--|--|
|                                           | 10CY-010   | 10CY-015 | 10CY-023 | 10CY-033 | Y1-CB080 | Y1-IG057 | Y1-LH077    | 10CY-035 | Y1-AW039 | Y1-IG053 |  |  |
| Rb (ppm)                                  | 284.9      | 246.8    | 232.4    | 206.5    | 147.3    | 453.1    | 164.7       | 196.2    | 131.3    | 114.4    |  |  |
| Sr (ppm)                                  | 104.4      | 64.28    | 99.59    | 98.35    | 144.3    | 11.92    | 139.3       | 269.8    | 181.0    | 285.9    |  |  |
| Rb/Sr                                     | 2.729      | 3.840    | 2.333    | 2.100    | 1.021    | 38.02    | 1.182       | 0.7272   | 0.7253   | 0.4002   |  |  |
| <sup>87</sup> Rb/ <sup>86</sup> Sr        | 7.919      | 11.1     | 6.762    | 6.090    | 2.960    | 111.8    | 3.429       | 2.105    | 2.101    | 1.159    |  |  |
| <sup>87</sup> Sr/ <sup>86</sup> Sr        | 0.739606   | 0.747548 | 0.729249 | 0.734213 | 0.731586 | 0.876719 | 0.738234    | 0.718274 | 0.721603 | 0.716186 |  |  |
| <sup>87</sup> Sr/ <sup>86</sup> Sr(100Ma) | 0.728538   | 0.731965 | 0.719797 | 0.725700 | 0.727449 | 0.720467 | 0.733440    | 0.715331 | 0.718667 | 0.714567 |  |  |
| <sup>87</sup> Sr/ <sup>86</sup> Sr(360Ma) | 0.699687   | 0.691346 | 0.695159 | 0.703511 | 0.716666 | 0.313191 | 0.720946    | 0.707661 | 0.711013 | 0.710346 |  |  |
| Sm (ppm)                                  | 13.23      | 9.802    | 10.50    | 7.233    | 7.593    | 12.45    | 7.506       | 2.494    | 6.301    | 6.469    |  |  |
| Nd (ppm)                                  | 69.90      | 51.43    | 46.59    | 35.57    | 38.56    | 65.74    | 38.24       | 11.52    | 28.76    | 34.52    |  |  |
| Sm/Nd                                     | 0.1893     | 0.1906   | 0.2253   | 0.2034   | 0.1969   | 0.1895   | 0.1963      | 0.2166   | 0.2191   | 0.1874   |  |  |
| <sup>147</sup> Sm/ <sup>144</sup> Nd      | 0.1144     | 0.1152   | 0.1210   | 0.1229   | 0.1190   | 0.1145   | 0.1187      | 0.1309   | 0.1324   | 0.1133   |  |  |
| <sup>143</sup> Nd/ <sup>144</sup> Nd      | 0.512100   | 0.512089 | 0.512139 | 0.512134 | 0.512073 | 0.512046 | 0.511914    | 0.512255 | 0.511908 | 0.512254 |  |  |
| εNd(0Ma)                                  | -10.5      | -10.7    | -9.7     | -9.8     | -11.0    | -11.5    | -14.1       | -7.4     | -14.2    | -7.5     |  |  |
| εNd(100Ma)                                | -9.4       | -9.6     | -8.7     | -8.9     | -10.0    | -10.5    | -13.1       | -6.6     | -13.4    | -6.4     |  |  |
| εNd(360Ma)                                | -6.7       | -6.9     | -6.2     | -6.4     | -7.4     | -7.7     | -10.5       | -4.4     | -11.3    | -3.6     |  |  |

  

| Sample no.:                               | Orthogneiss |          |          |          |           |          | Cretaceous granite |          |          |          |  |  |
|-------------------------------------------|-------------|----------|----------|----------|-----------|----------|--------------------|----------|----------|----------|--|--|
|                                           | Y1-AW049    | Y1-MJ075 | 10CY-039 | Y1-IG062 | C6-AW86-1 | Y1-AE064 | Y1-IG052           | Y1-IG070 | Y1-AW038 | Y1-AE033 |  |  |
| Rb (ppm)                                  | 133.2       | 224.8    | 164.9    | 154.4    | 167.2     | 130.7    | 131.0              | 84.6     | 255.2    | 154.9    |  |  |
| Sr (ppm)                                  | 288.3       | 156.5    | 240.1    | 225.8    | 328.8     | 210.7    | 252.9              | 219.1    | 172.3    | 195.2    |  |  |
| Rb/Sr                                     | 0.4620      | 1.436    | 0.6871   | 0.6838   | 0.5085    | 0.6204   | 0.5180             | 0.3860   | 1.481    | 0.7934   |  |  |
| <sup>87</sup> Rb/ <sup>86</sup> Sr        | 1.337       | 4.164    | 1.901    | 1.987    | 1.472     | 1.736    | 1.532              | 1.118    | 4.244    | 2.125    |  |  |
| <sup>87</sup> Sr/ <sup>86</sup> Sr        | 0.714254    | 0.730827 | 0.723275 | 0.719905 | 0.713751  | 0.721116 | 0.719866           | 0.721597 | 0.726049 | 0.728855 |  |  |
| <sup>87</sup> Sr/ <sup>86</sup> Sr(100Ma) | 0.712385    | 0.725007 | 0.720617 | 0.717127 | 0.711694  | 0.718689 | 0.717725           | 0.720034 | 0.720117 | 0.725884 |  |  |
| <sup>87</sup> Sr/ <sup>86</sup> Sr(360Ma) | 0.707513    | 0.709837 | 0.713690 | 0.709887 | 0.706332  | 0.712365 | 0.712143           | 0.715961 | 0.704654 | 0.718141 |  |  |
| Sm (ppm)                                  | 6.532       | 6.997    | 0.4368   | 3.471    | 4.972     | 2.625    | 1.073              | 0.4497   | 0.3425   | 2.927    |  |  |
| Nd (ppm)                                  | 38.37       | 46.79    | 1.975    | 15.02    | 25.77     | 13.39    | 5.652              | 2.956    | 1.120    | 12.29    |  |  |
| Sm/Nd                                     | 0.1702      | 0.1496   | 0.2211   | 0.2310   | 0.1930    | 0.1961   | 0.1898             | 0.1521   | 0.3057   | 0.2382   |  |  |
| <sup>147</sup> Sm/ <sup>144</sup> Nd      | 0.1029      | 0.0904   | 0.1337   | 0.1361   | 0.1166    | 0.1133   | 0.1400             | 0.0919   | 0.1848   | 0.1440   |  |  |
| <sup>143</sup> Nd/ <sup>144</sup> Nd      | 0.512238    | 0.512380 | 0.512211 | 0.512259 | 0.512284  | 0.512221 | 0.512208           | 0.512183 | 0.512348 | 0.512192 |  |  |
| εNd(0Ma)                                  | -7.8        | -5.0     | -8.3     | -7.4     | -6.9      | -8.1     | -8.4               | -8.8     | -5.6     | -8.7     |  |  |
| εNd(100Ma)                                | -6.6        | -3.6     | -7.5     | -6.6     | -5.8      | -7.1     | -7.3               | -7.5     | -5.5     | -8.0     |  |  |
| εNd(360Ma)                                | -3.5        | -0.1     | -5.4     | -4.7     | -3.2      | -4.5     | -4.6               | -4.1     | -5.1     | -6.2     |  |  |

$\lambda_{Rb} = 1.3968 \times 10^{-11}$ ;  $\lambda_{Sm} = 6.54 \times 10^{-12}$ ;  $^{143}Nd/^{144}Nd_{CHUR(0)} = 0.512638$ ;  $^{147}Sm/^{144}Nd_{CHUR(0)} = 0.1967$ .

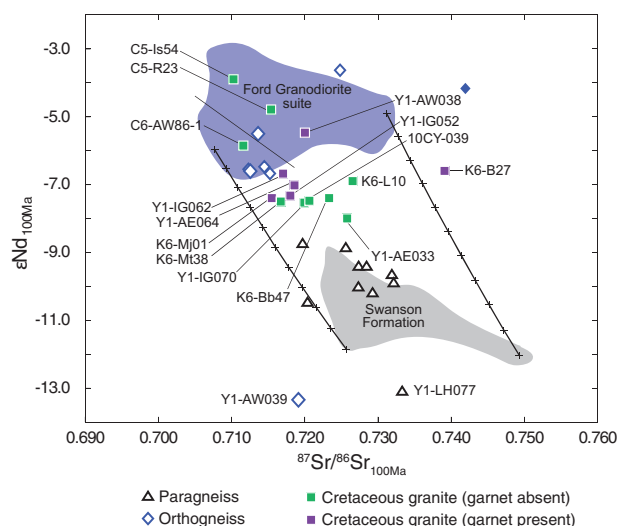

**Fig. 13.** Sr–Nd isotopic compositions at 100 Ma for potential source rocks and granites from the Ford Ranges. Data are from this study and Weaver *et al.* (1991, 1992) and Korhonen *et al.* (2010b). Tick marks along mixing curve are at 10% increments. The uncertainty on each data point is smaller than the symbols.

that passes through  $P$ – $T$  conditions for the end of doming is  $1230^{\circ}\text{C GPa}^{-1}$  (Fig. 16c and d). Extrapolating from these  $P$ – $T$  conditions, it is clear that the gneisses not far beneath the Fosdick complex would have undergone a much greater degree of partial melting that could have sourced the excess leucosome and granite within the complex. At  $950^{\circ}\text{C}$ , which equates to roughly 3 km below the Fosdick complex along the  $1230^{\circ}\text{C GPa}^{-1}$  apparent thermal gradient, the paragneiss modeled would have had  $\sim 11$  vol. % melt available for extraction and the orthogneiss  $\sim 20$  vol. % melt (Fig. 16c and d).

The forward modelling shows that the dominant source for granite magma at depth beneath the Fosdick complex during the Cretaceous metamorphism was likely to have been the high-grade equivalents of the Ford Granodiorite suite. By contrast, magma derived from paragneisses equivalent to the Swanson Formation would have been subordinate owing to the reduced fertility after Devonian–Carboniferous metamorphism and consequent upon melt drainage during prograde heating to peak temperatures for the Cretaceous metamorphism (see Yakymchuk & Brown, 2014).

## DISCUSSION

### Origin of the migmatitic gneisses

#### Orthogneiss

The orthogneisses have major oxide and trace element compositions that are close to those of the Ford Granodiorite suite, consistent with the hypothesis that they are the high-grade equivalents of these igneous protoliths (Figs 9–11; see Korhonen *et al.*, 2010b). Exceptions such as lower  $\text{K}_2\text{O}$  and  $\sum\text{REE}$ , and higher  $\text{Al}_2\text{O}_3$  at low  $\text{SiO}_2$ , are consistent with modification of

the composition by variable loss of granite melt and variable dissolution of accessory minerals in the source. The orthogneisses have Nd and Sr isotope compositions similar to those of the Ford Granodiorite suite at both 360 Ma (not shown) and 100 Ma (Fig. 13). Sample Y1-AW039 is an enclave of orthogneiss within Cretaceous granite that was emplaced into the thick unit of residual paragneiss at Mt Avers. Although this sample has high  $\text{P}_2\text{O}_5$  and low Th, consistent with apatite stability during melting, the less radiogenic  $\epsilon\text{Nd}$  is more likely to be the result of variable diffusive exchange with anatectic melt derived from the paragneiss prior to incorporation into the granite (see Leshner, 1994; Elburg, 1996). Because the zircons in the orthogneisses yield mostly Devonian–Carboniferous ages, their Hf isotope compositions were age corrected to 360 Ma. These zircons have Hf and O isotope compositions that lie within the range for zircons from the Ford Granodiorite suite samples (Fig. 14), confirming the interpretation that the orthogneisses were derived from this protolith.

#### Paragneiss

The paragneisses have detrital zircon age populations that are similar to those from the Swanson Formation, consistent with the hypothesis that they are the high-grade equivalents of these metasedimentary protoliths (Yakymchuk *et al.*, 2015a). Furthermore, they have similar major oxide and trace element compositions (Figs 9–11). Exceptions such as higher  $\text{FeO}^* + \text{MgO} + \text{TiO}_2$  and ASI at low  $\text{SiO}_2$ , and higher Th and U are consistent with modification of the composition by variable loss of granite melt and variable retention of accessory minerals in the residue. When age corrected to 100 Ma, which is the preferred age for the dominant anatectic event, all but one of the paragneiss samples have Sr and Nd isotope compositions similar to those of the Swanson Formation (Fig. 13). The exception has a more radiogenic  $\epsilon\text{Nd}$  isotope composition than the Swanson Formation, which we interpret to reflect variable diffusive exchange with anatectic melt derived from the Ford Granodiorite suite (see Leshner, 1994; Elburg, 1996). Considering these data in the regional context, the Swanson Formation is considered to be the likely protolith for the paragneisses in the Fosdick complex.

#### Petrogenesis of the granites

Granite compositions commonly depart from anatectic melt compositions generated in experimental studies. Processes that may create differences include accessory mineral dissolution, peritectic mineral entrainment and fractional crystallization. Additional factors that may account for the variable granite compositions are source heterogeneity and blending of melts derived from multiple sources. Below, we evaluate the relative contribution of each of these processes to the petrogenesis of granites in the Fosdick complex.



Table 4: Zircon Hf and O isotope analyses

| Spot                        | Assigned age (Ma) | $^{18}\text{O}/^{16}\text{O}$ | $\pm 10^{-7}$ | $\delta^{18}\text{O}_{\text{‰}}$ | $\pm 2\text{SE}$ | $^{176}\text{Hf}/^{177}\text{Hf}$ | $\pm 10^{-6}$ | $^{176}\text{Lu}/^{177}\text{Hf}$ | $\pm 10^{-5}$ | $\epsilon_{\text{Hf}(0)}$ | $^{176}\text{Hf}/^{177}\text{Hf}_{(t)}$ | $\epsilon_{\text{Hf}(t)}$ | $\pm 2\text{SE}$ | $\epsilon_{\text{Hf}(360)}$ | $\epsilon_{\text{Hf}(100)}$ |
|-----------------------------|-------------------|-------------------------------|---------------|----------------------------------|------------------|-----------------------------------|---------------|-----------------------------------|---------------|---------------------------|-----------------------------------------|---------------------------|------------------|-----------------------------|-----------------------------|
| <i>Y1-G053, orthogneiss</i> |                   |                               |               |                                  |                  |                                   |               |                                   |               |                           |                                         |                           |                  |                             |                             |
| IG053-1.1                   | 345               | 0.0020439                     | 1             | 8.67                             | 0.35             | 0.282485                          | 34            | 0.00050                           | 1             | -10.6                     | 0.282482                                | -3.0                      | 1.2              | -2.7                        | —                           |
| IG053-1.2                   | 377               | 0.0020448                     | 2             | 9.11                             | 0.36             | 0.282503                          | 41            | 0.00121                           | 7             | -10.0                     | 0.282495                                | -1.9                      | 1.5              | -2.2                        | —                           |
| IG053-2.1                   | 350               | 0.0020449                     | 1             | 9.14                             | 0.36             | 0.282488                          | 34            | 0.00045                           | 1             | -10.5                     | 0.282486                                | -2.8                      | 1.2              | -2.6                        | —                           |
| IG053-2.2                   | 533               | 0.0020400                     | 1             | 6.75                             | 0.35             | 0.282328                          | 41            | 0.00116                           | 12            | -16.1                     | 0.282317                                | -4.7                      | 1.5              | -8.4                        | —                           |
| IG053-3.2                   | 367               | 0.0020441                     | 2             | 8.74                             | 0.36             | 0.282480                          | 40            | 0.00131                           | 5             | -10.8                     | 0.282471                                | -2.9                      | 1.4              | -3.1                        | —                           |
| IG053-4.2                   | 367               | 0.0020448                     | 1             | 9.11                             | 0.35             | 0.282465                          | 40            | 0.00110                           | 2             | -11.3                     | 0.282458                                | -3.4                      | 1.4              | -3.6                        | —                           |
| IG053-5.1                   | 367               | 0.0020439                     | 1             | 8.67                             | 0.35             | 0.282560                          | 40            | 0.00101                           | 4             | -7.9                      | 0.282554                                | 0.0                       | 1.4              | -0.2                        | —                           |
| IG053-5.2                   | 287               | 0.0020439                     | 1             | 8.68                             | 0.35             | 0.282460                          | 38            | 0.00101                           | 3             | -11.5                     | 0.282455                                | -5.3                      | 1.3              | —                           | —                           |
| IG053-6.1                   | 356               | 0.0020442                     | 1             | 8.82                             | 0.35             | 0.282475                          | 35            | 0.00041                           | 1             | -10.9                     | 0.282473                                | -3.1                      | 1.2              | -3.0                        | —                           |
| IG053-6.2                   | 367               | 0.0020433                     | 1             | 8.36                             | 0.35             | 0.282492                          | 32            | 0.00055                           | 5             | -10.3                     | 0.282489                                | -2.3                      | 1.1              | -2.5                        | —                           |
| IG053-7.1                   | 367               | 0.0020438                     | 2             | 8.61                             | 0.37             | 0.282497                          | 35            | 0.00077                           | 1             | -10.2                     | 0.282492                                | -2.2                      | 1.2              | -2.4                        | —                           |
| IG053-8.1                   | 367               | 0.0020441                     | 2             | 8.76                             | 0.36             | 0.282441                          | 31            | 0.00059                           | 2             | -12.1                     | 0.282437                                | -4.1                      | 1.1              | -4.3                        | —                           |
| IG053-9.1                   | 346               | 0.0020440                     | 2             | 8.73                             | 0.36             | 0.282503                          | 37            | 0.00079                           | 3             | -10.0                     | 0.282498                                | -2.4                      | 1.3              | -2.1                        | —                           |
| IG053-13.1                  | 367               | 0.0020438                     | 2             | 8.61                             | 0.36             | 0.282509                          | 38            | 0.00136                           | 3             | -9.7                      | 0.282500                                | -1.9                      | 1.3              | -2.1                        | —                           |
| IG053-14.1                  | 350               | 0.0020445                     | 2             | 8.96                             | 0.36             | 0.282476                          | 40            | 0.00104                           | 3             | -10.9                     | 0.282470                                | -3.4                      | 1.4              | -3.2                        | —                           |
| IG053-16.1                  | 367               | 0.0020445                     | 2             | 8.96                             | 0.35             | 0.282477                          | 35            | 0.00070                           | 1             | -10.9                     | 0.282473                                | -2.9                      | 1.2              | -3.0                        | —                           |
| IG053-17.1                  | 367               | 0.0020452                     | 1             | 9.30                             | 0.35             | 0.282501                          | 30            | 0.00146                           | 4             | -10.0                     | 0.282491                                | -2.2                      | 1.1              | -2.4                        | —                           |
| IG053-18.1                  | 355               | 0.0020443                     | 3             | 8.87                             | 0.38             | 0.282447                          | 37            | 0.00045                           | 1             | -11.9                     | 0.282444                                | -4.2                      | 1.3              | -4.1                        | —                           |
| IG053-18.2                  | 367               | 0.0020446                     | 0             | 8.99                             | 0.35             | 0.282497                          | 41            | 0.00037                           | 1             | -10.2                     | 0.282495                                | -2.1                      | 1.5              | -2.3                        | —                           |
| IG053-19.1                  | 355               | 0.0020445                     | 1             | 8.98                             | 0.35             | 0.282484                          | 28            | 0.00072                           | 1             | -10.6                     | 0.282480                                | -2.9                      | 1.0              | -2.8                        | —                           |
| IG053-19.2                  | 378               | 0.0020431                     | 2             | 8.27                             | 0.37             | 0.282526                          | 35            | 0.00071                           | 2             | -9.1                      | 0.282521                                | -0.9                      | 1.2              | -1.3                        | —                           |
| <i>K6-B26, orthogneiss</i>  |                   |                               |               |                                  |                  |                                   |               |                                   |               |                           |                                         |                           |                  |                             |                             |
| K6B26-1.1                   | 366               | 0.0020437                     | 3             | 8.56                             | 0.37             | 0.282494                          | 42            | 0.00110                           | 2             | -10.0                     | 0.282487                                | -2.4                      | 1.5              | -2.5                        | —                           |
| K6B26-2.1                   | 338               | 0.0020435                     | 0             | 8.47                             | 0.35             | 0.282448                          | 34            | 0.00125                           | 4             | -11.9                     | 0.282441                                | -4.7                      | 1.2              | -4.2                        | —                           |
| K6B26-3.1                   | 336               | 0.0020447                     | 2             | 9.04                             | 0.36             | 0.282479                          | 42            | 0.00093                           | 3             | -10.2                     | 0.282474                                | -3.5                      | 1.5              | -3.0                        | —                           |
| K6B26-4.2                   | 366               | 0.0020429                     | 5             | 8.20                             | 0.42             | 0.282536                          | 48            | 0.00090                           | 3             | -10.6                     | 0.282530                                | -0.9                      | 1.7              | -1.0                        | —                           |
| K6B26-6.1                   | 366               | 0.0020429                     | 2             | 8.16                             | 0.36             | 0.282485                          | 36            | 0.00073                           | 3             | -9.1                      | 0.282481                                | -2.6                      | 1.3              | -2.8                        | —                           |
| K6B26-7.1                   | 366               | 0.0020432                     | 1             | 8.34                             | 0.35             | 0.282505                          | 34            | 0.00095                           | 7             | -9.5                      | 0.282499                                | -2.0                      | 1.2              | -2.1                        | —                           |
| K6B26-8.1                   | 366               | 0.0020435                     | 1             | 8.46                             | 0.35             | 0.282527                          | 40            | 0.00113                           | 3             | -9.1                      | 0.282520                                | -1.2                      | 1.4              | -1.4                        | —                           |
| K6B26-9.1                   | 366               | 0.0020443                     | 1             | 8.88                             | 0.35             | 0.282510                          | 38            | 0.00164                           | 6             | -8.8                      | 0.282499                                | -2.0                      | 1.3              | -2.1                        | —                           |
| K6B26-10.1                  | 366               | 0.0020433                     | 2             | 8.37                             | 0.36             | 0.282505                          | 36            | 0.00127                           | 5             | -8.5                      | 0.282497                                | -2.0                      | 1.3              | -2.2                        | —                           |
| K6B26-10.2                  | 366               | 0.0020426                     | 3             | 8.03                             | 0.39             | 0.282509                          | 52            | 0.00113                           | 14            | -8.2                      | 0.282502                                | -1.9                      | 1.8              | -2.0                        | —                           |
| K6B26-11.1                  | 366               | 0.0020430                     | 1             | 8.25                             | 0.35             | 0.282475                          | 59            | 0.00312                           | 5             | -7.9                      | 0.282454                                | -3.6                      | 2.1              | -3.7                        | —                           |
| K6B26-12.1                  | 366               | 0.0020433                     | 2             | 8.40                             | 0.36             | 0.282526                          | 46            | 0.00089                           | 3             | -7.6                      | 0.282520                                | -1.2                      | 1.6              | -1.4                        | —                           |
| K6B26-13.1                  | 366               | 0.0020441                     | 2             | 8.79                             | 0.36             | 0.282464                          | 38            | 0.00088                           | 2             | -7.3                      | 0.282458                                | -3.4                      | 1.3              | -3.6                        | —                           |
| K6B26-14.1                  | 366               | 0.0020442                     | 1             | 8.84                             | 0.35             | 0.282490                          | 41            | 0.00075                           | 3             | -7.0                      | 0.282485                                | -2.5                      | 1.5              | -2.6                        | —                           |
| K6B26-15.2                  | 366               | 0.0020436                     | 1             | 8.54                             | 0.36             | 0.282549                          | 45            | 0.00096                           | 0             | -6.7                      | 0.282543                                | -0.4                      | 1.6              | -0.6                        | —                           |
| K6B26-16.1                  | 335               | 0.0020459                     | 1             | 9.67                             | 0.35             | 0.282486                          | 81            | 0.00091                           | 4             | -6.4                      | 0.282481                                | -3.3                      | 2.9              | -2.8                        | —                           |
| K6B26-17.1                  | 366               | 0.0020440                     | 2             | 8.71                             | 0.36             | 0.282542                          | 43            | 0.00080                           | 5             | -6.1                      | 0.282537                                | -0.6                      | 1.5              | -0.8                        | —                           |
| K6B26-18.1                  | 366               | 0.0020440                     | 1             | 8.73                             | 0.35             | 0.282521                          | 33            | 0.00076                           | 4             | -5.7                      | 0.282516                                | -1.4                      | 1.2              | -1.5                        | —                           |
| K6B26-19.1                  | 366               | 0.0020449                     | 1             | 9.16                             | 0.35             | 0.282511                          | 47            | 0.00108                           | 1             | -5.4                      | 0.282504                                | -1.8                      | 1.7              | -1.9                        | —                           |
| K6B26-20.1                  | 105               | 0.0020461                     | 2             | 9.77                             | 0.36             | 0.282549                          | 26            | 0.00039                           | 0             | -5.1                      | 0.282549                                | -6.0                      | 0.9              | —                           | -6.2                        |
| <i>Y1-G062, granite</i>     |                   |                               |               |                                  |                  |                                   |               |                                   |               |                           |                                         |                           |                  |                             |                             |
| IG062-1.1                   | 98                | 0.0020470                     | 2             | 10.21                            | 0.36             | 0.282582                          | 32            | 0.00047                           | 1             | -7.2                      | 0.282582                                | -5.0                      | 1.1              | —                           | -5.0                        |
| IG062-1.2                   | 1621              | 0.0020386                     | 1             | 6.05                             | 0.35             | 0.282082                          | 77            | 0.00131                           | 3             | -24.8                     | 0.282042                                | 10.3                      | 2.7              | —                           | —                           |
| IG062-2.1                   | 110               | 0.0020456                     | 2             | 9.51                             | 0.37             | 0.282675                          | 31            | 0.00048                           | 0             | -3.9                      | 0.282675                                | -1.5                      | 1.1              | —                           | -1.7                        |
| IG062-2.2                   | 344               | 0.0020458                     | 1             | 9.58                             | 0.35             | 0.282492                          | 26            | 0.00064                           | 2             | -10.3                     | 0.282488                                | -2.8                      | 0.9              | -2.5                        | —                           |
| IG062-3.1                   | 98                | 0.0020465                     | 1             | 9.94                             | 0.35             | 0.282530                          | 38            | 0.00057                           | 2             | -9.0                      | 0.282529                                | -6.9                      | 1.3              | —                           | -6.8                        |
| IG062-4.1                   | 331               | 0.0020469                     | 1             | 10.16                            | 0.35             | 0.282457                          | 26            | 0.00111                           | 1             | -11.6                     | 0.282451                                | -4.5                      | 0.9              | -3.9                        | —                           |
| IG062-6.1                   | 359               | 0.0020448                     | 1             | 9.12                             | 0.35             | 0.282504                          | 39            | 0.00128                           | 3             | -9.9                      | 0.282496                                | -2.2                      | 1.4              | -2.2                        | —                           |

(continued)

Table 4. Continued

| Spot              | Assigned age (Ma) | $^{18}\text{O}/^{16}\text{O}$ | $\pm 10^{-7}$ | $\delta^{18}\text{O}\text{‰}$ | $\pm 2\text{SE}$ | $^{176}\text{Hf}/^{177}\text{Hf}$ | $\pm 10^{-6}$ | $^{176}\text{Lu}/^{177}\text{Hf}$ | $\pm 10^{-5}$ | $\epsilon_{\text{Hf}(t)}$ | $^{176}\text{Hf}/^{177}\text{Hf}(t)$ | $\epsilon_{\text{Hf}(t)}$ | $\pm 2\text{SE}$ | $\epsilon_{\text{Hf}(360)}$ | $\epsilon_{\text{Hf}(100)}$ |
|-------------------|-------------------|-------------------------------|---------------|-------------------------------|------------------|-----------------------------------|---------------|-----------------------------------|---------------|---------------------------|--------------------------------------|---------------------------|------------------|-----------------------------|-----------------------------|
| IG062-6.2         | 368               | 0.0020456                     | 0             | 9.50                          | 0.35             | 0.282513                          | 29            | 0.00105                           | 1             | -9.6                      | 0.282506                             | -1.7                      | 1.0              | -1.9                        | —                           |
| IG062-6.3         | 126               | 0.0020455                     | 1             | 9.47                          | 0.36             | 0.282557                          | 31            | 0.00073                           | 2             | -8.0                      | 0.282556                             | -5.3                      | 1.1              | —                           | -5.9                        |
| IG062-10.1        | 390               | 0.0020456                     | 2             | 9.51                          | 0.36             | 0.282397                          | 83            | 0.00087                           | 9             | -13.7                     | 0.282391                             | -5.2                      | 2.9              | -5.9                        | —                           |
| IG062-10.2        | 361               | 0.0020446                     | 1             | 9.02                          | 0.35             | 0.282497                          | 48            | 0.00103                           | 9             | -10.2                     | 0.282491                             | -2.4                      | 1.7              | -2.4                        | —                           |
| IG062-11.1        | 119               | 0.0020466                     | 2             | 9.99                          | 0.36             | 0.282608                          | 50            | 0.00123                           | 9             | -6.2                      | 0.282606                             | -3.7                      | 1.8              | —                           | -4.1                        |
| IG062-11.2        | 377               | 0.0020454                     | 2             | 9.39                          | 0.36             | 0.282483                          | 38            | 0.00101                           | 3             | -10.7                     | 0.282476                             | -2.5                      | 1.3              | -2.9                        | —                           |
| IG062-12.1        | 114               | 0.0020462                     | 2             | 9.78                          | 0.36             | 0.282638                          | 28            | 0.00082                           | 2             | -5.2                      | 0.282637                             | -2.7                      | 1.0              | —                           | -3.0                        |
| IG062-12.2        | 393               | 0.0020467                     | 3             | 10.06                         | 0.37             | 0.282413                          | 40            | 0.00033                           | 2             | -13.1                     | 0.282411                             | -4.5                      | 1.4              | -5.2                        | —                           |
| IG062-12.3        | 333               | 0.0020442                     | 2             | 8.81                          | 0.37             | 0.282507                          | 42            | 0.00053                           | 2             | -9.8                      | 0.282504                             | -2.5                      | 1.5              | -1.9                        | —                           |
| IG062-14.1        | 109               | 0.0020465                     | 2             | 9.94                          | 0.36             | 0.282618                          | 36            | 0.00060                           | 2             | -5.9                      | 0.282617                             | -3.5                      | 1.3              | —                           | -3.7                        |
| IG062-17.1        | 107               | 0.0020457                     | 2             | 9.53                          | 0.37             | 0.282602                          | 30            | 0.00054                           | 1             | -6.5                      | 0.282601                             | -4.1                      | 1.1              | —                           | -4.3                        |
| IG062-18.1        | 108               | 0.0020463                     | 1             | 9.84                          | 0.35             | 0.282622                          | 39            | 0.00070                           | 3             | -5.7                      | 0.282621                             | -3.4                      | 1.4              | —                           | -3.6                        |
| IG062-18.2        | 359               | 0.0020455                     | 1             | 9.45                          | 0.35             | 0.282480                          | 34            | 0.00124                           | 5             | -10.8                     | 0.282472                             | -3.1                      | 1.2              | -3.1                        | —                           |
| IG062-19.1        | 375               | 0.0020451                     | 1             | 9.25                          | 0.35             | 0.282462                          | 28            | 0.00079                           | 5             | -11.4                     | 0.282457                             | -3.2                      | 1.0              | -3.6                        | —                           |
| IG062-20.1        | 379               | 0.0020448                     | 1             | 9.13                          | 0.35             | 0.282459                          | 33            | 0.00107                           | 7             | -11.5                     | 0.282452                             | -3.3                      | 1.2              | -3.8                        | —                           |
| IG062-21.1        | 107               | 0.0020461                     | 2             | 9.76                          | 0.36             | 0.282518                          | 36            | 0.00057                           | 5             | -9.4                      | 0.282517                             | -7.1                      | 1.3              | —                           | -7.3                        |
| Y1-AW038, granite |                   |                               |               |                               |                  |                                   |               |                                   |               |                           |                                      |                           |                  |                             |                             |
| AW038-1.1         | 103               | 0.0020461                     | 2             | 9.35                          | 0.31             | 0.282575                          | 31            | 0.00106                           | 1             | -10.0                     | 0.282573                             | -5.2                      | 1.1              | —                           | -5.3                        |
| AW038-1.2         | 113               | 0.0020471                     | 1             | 9.85                          | 0.30             | 0.282585                          | 29            | 0.00098                           | 1             | -11.9                     | 0.282583                             | -4.6                      | 1.0              | —                           | -4.9                        |
| AW038-3.1         | 113               | 0.0020462                     | 1             | 9.40                          | 0.30             | 0.282601                          | 37            | 0.00131                           | 0             | -10.2                     | 0.282599                             | -4.1                      | 1.3              | —                           | -4.4                        |
| AW038-4.2         | 110               | 0.0020460                     | 1             | 9.32                          | 0.30             | 0.282583                          | 30            | 0.00135                           | 3             | -10.6                     | 0.282581                             | -4.8                      | 1.1              | —                           | -5.0                        |
| AW038-5.1         | 103               | 0.0020451                     | 1             | 8.87                          | 0.30             | 0.282551                          | 37            | 0.00155                           | 7             | -9.1                      | 0.282549                             | -6.1                      | 1.3              | —                           | -6.2                        |
| AW038-6.1         | 112               | 0.0020466                     | 1             | 9.60                          | 0.30             | 0.282608                          | 29            | 0.00103                           | 1             | -9.5                      | 0.282606                             | -3.8                      | 1.0              | —                           | -4.1                        |
| AW038-6.2         | 107               | 0.0020460                     | 1             | 9.33                          | 0.30             | 0.282580                          | 27            | 0.00088                           | 1             | -9.1                      | 0.282579                             | -4.9                      | 1.0              | —                           | -5.1                        |
| AW038-7.1         | 112               | 0.0020460                     | 2             | 9.33                          | 0.30             | 0.282574                          | 43            | 0.00148                           | 4             | -8.8                      | 0.282571                             | -5.1                      | 1.5              | —                           | -5.3                        |
| AW038-8.1         | 103               | 0.0020457                     | 0             | 9.18                          | 0.31             | 0.282573                          | 53            | 0.00046                           | 0             | -8.5                      | 0.282573                             | -5.2                      | 1.9              | —                           | -5.3                        |
| AW038-10.1        | 110               | 0.0020467                     | 2             | 9.65                          | 0.31             | 0.282583                          | 24            | 0.00116                           | 2             | -8.2                      | 0.282581                             | -4.8                      | 0.8              | —                           | -5.0                        |
| AW038-12.1        | 103               | 0.0020452                     | 1             | 8.94                          | 0.30             | 0.282538                          | 68            | 0.00178                           | 4             | -7.9                      | 0.282535                             | -6.6                      | 2.4              | —                           | -6.6                        |
| AW038-14.1        | 111               | 0.0020472                     | 2             | 9.92                          | 0.31             | 0.282565                          | 24            | 0.00085                           | 2             | -7.6                      | 0.282564                             | -5.4                      | 0.8              | —                           | -5.6                        |
| AW038-14.1        | 115               | 0.0020472                     | 2             | 9.30                          | 0.30             | 0.282576                          | 38            | 0.00102                           | 2             | -7.3                      | 0.282574                             | -4.9                      | 1.3              | —                           | -5.2                        |
| AW038-15.1        | 115               | 0.0020459                     | 2             | 8.83                          | 0.31             | 0.282565                          | 39            | 0.00123                           | 2             | -7.0                      | 0.282563                             | -5.4                      | 1.4              | —                           | -5.6                        |
| AW038-16.1        | 108               | 0.0020450                     | 2             | 9.59                          | 0.31             | 0.282604                          | 34            | 0.00108                           | 1             | -6.7                      | 0.282602                             | -3.9                      | 1.2              | —                           | -4.3                        |
| AW038-17.1        | 116               | 0.0020465                     | 2             | 8.88                          | 0.31             | 0.282604                          | 25            | 0.00071                           | 0             | -6.4                      | 0.282582                             | -4.6                      | 0.9              | —                           | -5.0                        |
| AW038-18.1        | 114               | 0.0020451                     | 2             | 8.88                          | 0.31             | 0.282583                          | 25            | 0.00071                           | 0             | -6.4                      | 0.282582                             | -4.6                      | 0.9              | —                           | -5.0                        |
| AW038-19.1        | 113               | 0.0020457                     | 2             | 9.20                          | 0.32             | 0.282622                          | 77            | 0.00096                           | 1             | -6.1                      | 0.282620                             | -3.3                      | 2.7              | —                           | -3.6                        |
| AW038-20.1        | 117               | 0.0020459                     | 1             | 9.29                          | 0.30             | 0.282632                          | 35            | 0.00127                           | 4             | -5.7                      | 0.282630                             | -2.9                      | 1.2              | —                           | -3.3                        |
| Y1-IG070, granite |                   |                               |               |                               |                  |                                   |               |                                   |               |                           |                                      |                           |                  |                             |                             |
| IG070-1.1         | 107               | 0.0020447                     | 1             | 8.69                          | 0.30             | 0.282582                          | 32            | 0.00177                           | 2             | -10.0                     | 0.282579                             | -4.9                      | 1.1              | —                           | -5.1                        |
| IG070-2.1         | 107               | 0.0020466                     | 1             | 9.63                          | 0.30             | 0.282528                          | 37            | 0.00287                           | 12            | -11.9                     | 0.282523                             | -6.9                      | 1.3              | —                           | -7.1                        |
| IG070-3.1         | 107               | 0.0020455                     | 1             | 9.06                          | 0.30             | 0.282574                          | 39            | 0.00164                           | 2             | -10.2                     | 0.282571                             | -5.2                      | 1.4              | —                           | -5.4                        |
| IG070-4.1         | 107               | 0.0020458                     | 2             | 9.23                          | 0.31             | 0.282583                          | 34            | 0.00148                           | 1             | -10.6                     | 0.282581                             | -4.9                      | 1.2              | —                           | -5.0                        |
| IG070-5.1         | 107               | 0.0020467                     | 1             | 9.67                          | 0.30             | 0.282586                          | 43            | 0.00152                           | 1             | -9.1                      | 0.282583                             | -4.8                      | 1.5              | —                           | -4.9                        |
| IG070-6.1         | 107               | 0.0020457                     | 1             | 9.19                          | 0.30             | 0.282561                          | 33            | 0.00136                           | 2             | -9.5                      | 0.282559                             | -5.6                      | 1.2              | —                           | -5.8                        |
| IG070-7.1         | 107               | 0.0020451                     | 1             | 8.90                          | 0.30             | 0.282608                          | 36            | 0.00192                           | 9             | -9.1                      | 0.282605                             | -4.0                      | 1.3              | —                           | -4.2                        |
| IG070-8.1         | 107               | 0.0020467                     | 2             | 9.67                          | 0.31             | 0.282575                          | 37            | 0.00123                           | 4             | -8.8                      | 0.282573                             | -5.1                      | 1.3              | —                           | -5.3                        |
| IG070-9.1         | 107               | 0.0020473                     | 1             | 9.97                          | 0.30             | 0.282576                          | 41            | 0.00223                           | 10            | -8.5                      | 0.282572                             | -5.2                      | 1.5              | —                           | -5.3                        |
| IG070-11.1        | 110               | 0.0020471                     | 0             | 9.86                          | 0.30             | 0.282555                          | 35            | 0.00125                           | 4             | -8.2                      | 0.282553                             | -5.8                      | 1.2              | —                           | -6.0                        |
| IG070-12.1        | 112               | 0.0020453                     | 1             | 8.96                          | 0.30             | 0.282613                          | 44            | 0.00170                           | 2             | -7.9                      | 0.282610                             | -3.7                      | 1.6              | —                           | -4.0                        |
| IG070-13.1        | 113               | 0.0020479                     | 1             | 10.27                         | 0.30             | 0.282551                          | 36            | 0.00144                           | 1             | -7.6                      | 0.282548                             | -5.9                      | 1.3              | —                           | -6.2                        |
| IG070-15.1        | 115               | 0.0020471                     | 2             | 9.84                          | 0.31             | 0.282587                          | 40            | 0.00112                           | 2             | -7.3                      | 0.282585                             | -4.5                      | 1.4              | —                           | -4.9                        |

$^{176}\text{Lu}$  decay constant is  $1.865 \times 10^{-11}$  (Söderlund et al., 2004).  $^{176}\text{Hf}/^{177}\text{Hf}$  and  $^{176}\text{Lu}/^{177}\text{Hf}$  values are 0.282785 and 0.0336, respectively (Bouvier et al., 2008).

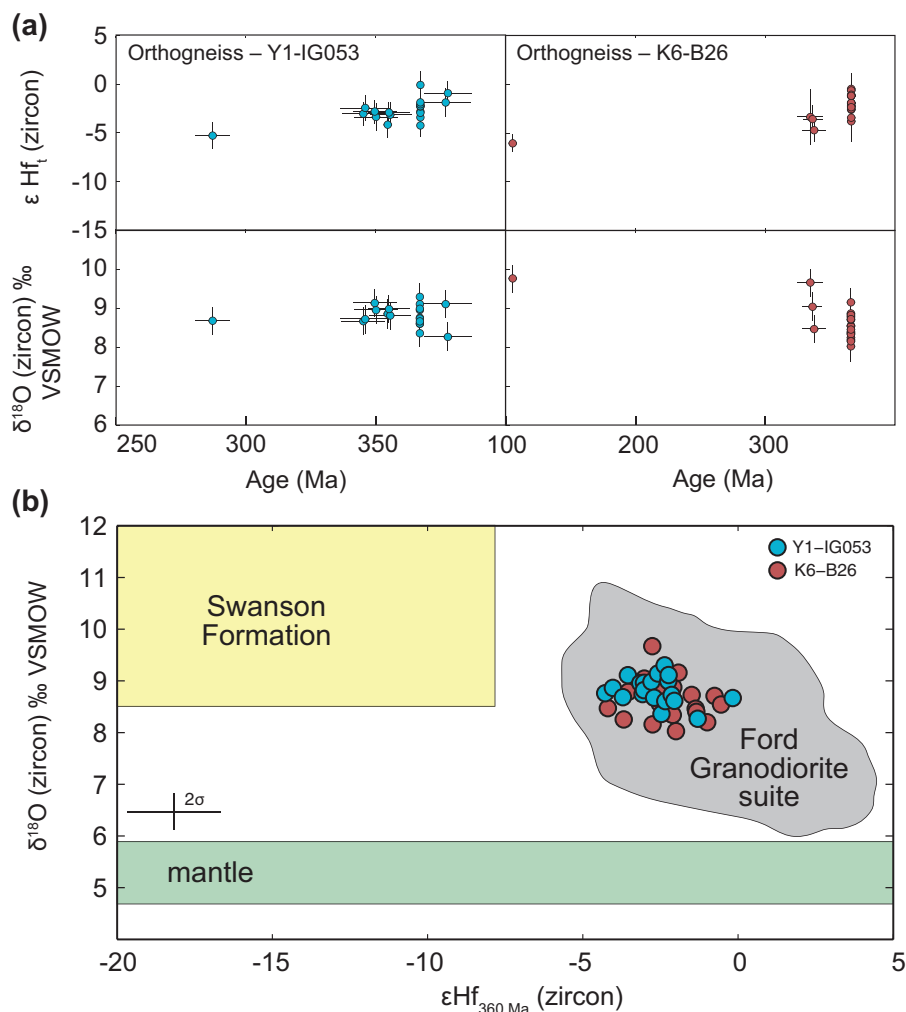

**Fig. 14.** (a) Variation of  $\delta^{18}O$  and  $\epsilon Hf_t$  in zircon vs  $^{238}U/^{206}Pb$  age for migmatitic orthogneisses. (b)  $\delta^{18}O$  vs  $\epsilon Hf_{360}$  for migmatitic orthogneisses. The range of  $\epsilon Hf$  values for the Swanson Formation represents the interquartile range of zircon values recalculated to 360 Ma and the  $\delta^{18}O$  value range is from oxygen isotope analysis of six whole-rock samples (Yakymchuk *et al.*, 2015a). The  $\epsilon Hf$  and  $\delta^{18}O$  values of the Ford Granodiorite are from Yakymchuk *et al.* (2013b, 2015a). The  $\delta^{18}O$  value of mantle-derived rocks is  $5.3 \pm 0.6\%$  (Valley *et al.*, 1998). The cross in the bottom left shows the approximate  $\pm 2\sigma$  uncertainties for single Hf and O isotope values.

#### Accessory mineral dissolution

Accessory minerals may play an important role in controlling the trace element concentrations and isotope compositions of granites (e.g. Watt & Harley, 1993; Bea, 1996; Ayres & Harris, 1997; Zeng *et al.*, 2005a, 2005b, 2005c). If the dissolution or growth of accessory minerals such as monazite, apatite and zircon was a dominant control on the trace element chemistry of granites then covariation is expected between various rare earth elements and  $P_2O_5$  (apatite), Th (monazite) or Zr (zircon). As discussed above, the negative covariation between  $\sum LREE$  and  $P_2O_5$  in the granites is consistent with apatite stability during melting. However, the weak covariation between  $\sum LREE$  and Th and the variable moderate covariation between  $\sum HREE$  and Zr suggest that crystallization and fractionation of monazite and zircon had some influence on the compositional variation (Fig. 10).

#### Peritectic mineral entrainment

Hydrate-breakdown melting of the deep crust is associated with the production of peritectic minerals (Brown, 2013). Some I- and S-type granite suites show covariance in major element compositions that is interpreted to represent selective entrainment of peritectic minerals from the anatexic residua (e.g. Clemens *et al.*, 2011). These minerals may be dissolved or may achieve equilibrium during melt extraction and ascent. Trends in the major element concentrations of granite suites have been attributed to varying amounts of peritectic mineral entrainment (Clemens & Stevens, 2012).

Granites from the Fostdick complex contain sparse garnet and cordierite that are usually associated with biotite-rich schlieren, which are interpreted to represent former residue entrained in the melt during extraction and/or ascent (see Solar & Brown, 2001). In addition,

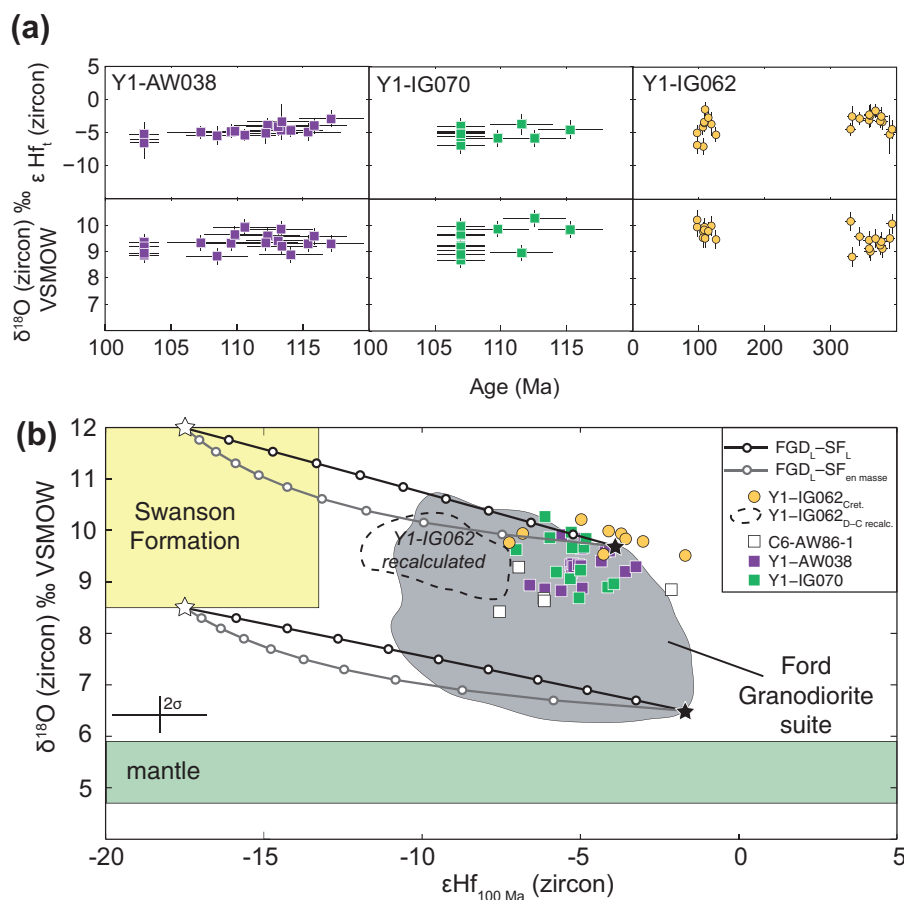

**Fig. 15.** (a) Variation of  $\delta^{18}\text{O}$  and  $\epsilon\text{Hf}_t$  in zircon vs  $^{238}\text{U}/^{206}\text{Pb}$  age for Cretaceous granites from the Fossdick complex. (b)  $\delta^{18}\text{O}$  vs  $\epsilon\text{Hf}_{100}$  for granites from the Fossdick Complex. Also shown are the ranges of zircon  $\epsilon\text{Hf}$  and  $\delta^{18}\text{O}$  values for three potential sources: Swanson Formation, Ford Granodiorite suite and the mantle. For the Swanson Formation, a portion of the interquartile range of  $\epsilon\text{Hf}$  values of detrital zircon recalculated to 100 Ma is shown (the interquartile range extends from  $-13.9$  to  $-30.3$ ). The  $\delta^{18}\text{O}$  value range of the Swanson Formation is based on oxygen isotope analysis of six whole-rock samples (Yakymchuk *et al.*, 2015a). The  $\epsilon\text{Hf}$  and  $\delta^{18}\text{O}$  values of the Ford Granodiorite suite are from Yakymchuk *et al.* (2013b, 2015a). The  $\delta^{18}\text{O}$  value of mantle-derived rocks is  $5.3 \pm 0.6$ ‰ (Valley *et al.*, 1998). Two binary mixing models were calculated for mixing between anatectic melt from the Ford Granodiorite suite (FGD) with anatectic melt from the Swanson Formation or the assimilation of the Swanson Formation (SF) *en masse* using representative end-members (stars) of each source as discussed in the text. The cross in the bottom left shows the approximate  $\pm 2\sigma$  uncertainties for single Hf and O isotope values. The dashed field represents the range of  $\epsilon\text{Hf}$  values of Devonian-Carboniferous zircon from Y1-IG062 recalculated to 100 Ma.

**Table 5:** Compositions used for phase equilibria modelling

| Sample   | Weight % (from XRF whole-rock analyses) |                  |                                |                                |      |      |      |      |                   |                  |                               |      |        |
|----------|-----------------------------------------|------------------|--------------------------------|--------------------------------|------|------|------|------|-------------------|------------------|-------------------------------|------|--------|
|          | SiO <sub>2</sub>                        | TiO <sub>2</sub> | Al <sub>2</sub> O <sub>3</sub> | Fe <sub>2</sub> O <sub>3</sub> | FeO  | MnO  | MgO  | CaO  | Na <sub>2</sub> O | K <sub>2</sub> O | P <sub>2</sub> O <sub>5</sub> | LOI  | Total  |
| 10CY-15  | 68.82                                   | 0.81             | 14.67                          | 1.24                           | 4.55 | 0.05 | 2.76 | 0.82 | 1.64              | 3.05             | 0.06                          | 1.77 | 100.24 |
| Y1-IG053 | 65.51                                   | 0.89             | 16.60                          | 1.03                           | 3.86 | 0.07 | 2.02 | 3.95 | 3.40              | 2.20             | 0.30                          | 1.01 | 100.84 |
| 10CY-002 | 63.92                                   | 0.70             | 16.52                          | 0.74                           | 5.82 | 0.11 | 3.76 | 1.25 | 2.44              | 4.24             | 0.17                          | 1.86 | 101.53 |
| R7218    | 71.13                                   | 0.38             | 13.97                          | 2.44                           | —    | 0.05 | 0.91 | 2.36 | 3.45              | 3.64             | 0.14                          | 1.05 | 99.52  |

  

| Sample   | Figure | Normalized molar proportions (mol %) |                  |                                |      |      |      |                  |                   |                  |       |       |
|----------|--------|--------------------------------------|------------------|--------------------------------|------|------|------|------------------|-------------------|------------------|-------|-------|
|          |        | H <sub>2</sub> O                     | SiO <sub>2</sub> | Al <sub>2</sub> O <sub>3</sub> | CaO  | MgO  | FeO  | K <sub>2</sub> O | Na <sub>2</sub> O | TiO <sub>2</sub> | O     | Total |
| 10CY-15  | 16c    | 0.92                                 | 74.27            | 9.34                           | 0.95 | 4.44 | 5.11 | 2.10             | 1.72              | 0.65             | 0.51  | 100   |
| Y1-IG053 | 16d    | 1.59                                 | 69.84            | 10.43                          | 4.51 | 3.21 | 4.26 | 1.50             | 3.52              | 0.71             | 0.42  | 100   |
| 10CY-002 | 16a    | 5.56                                 | 65.69            | 10.00                          | 1.38 | 5.76 | 5.58 | 2.78             | 2.43              | 0.54             | 0.28  | 100   |
| R7218    | 16b    | 3.70                                 | 75.24            | 8.71                           | 2.67 | 1.44 | 1.94 | 2.46             | 3.54              | 0.30             | 0.10* | 100   |

\*Ten per cent of iron assumed to be ferric. All other  $\text{Fe}^{2+}/\text{Fe}^{3+}$  values were determined by titration.

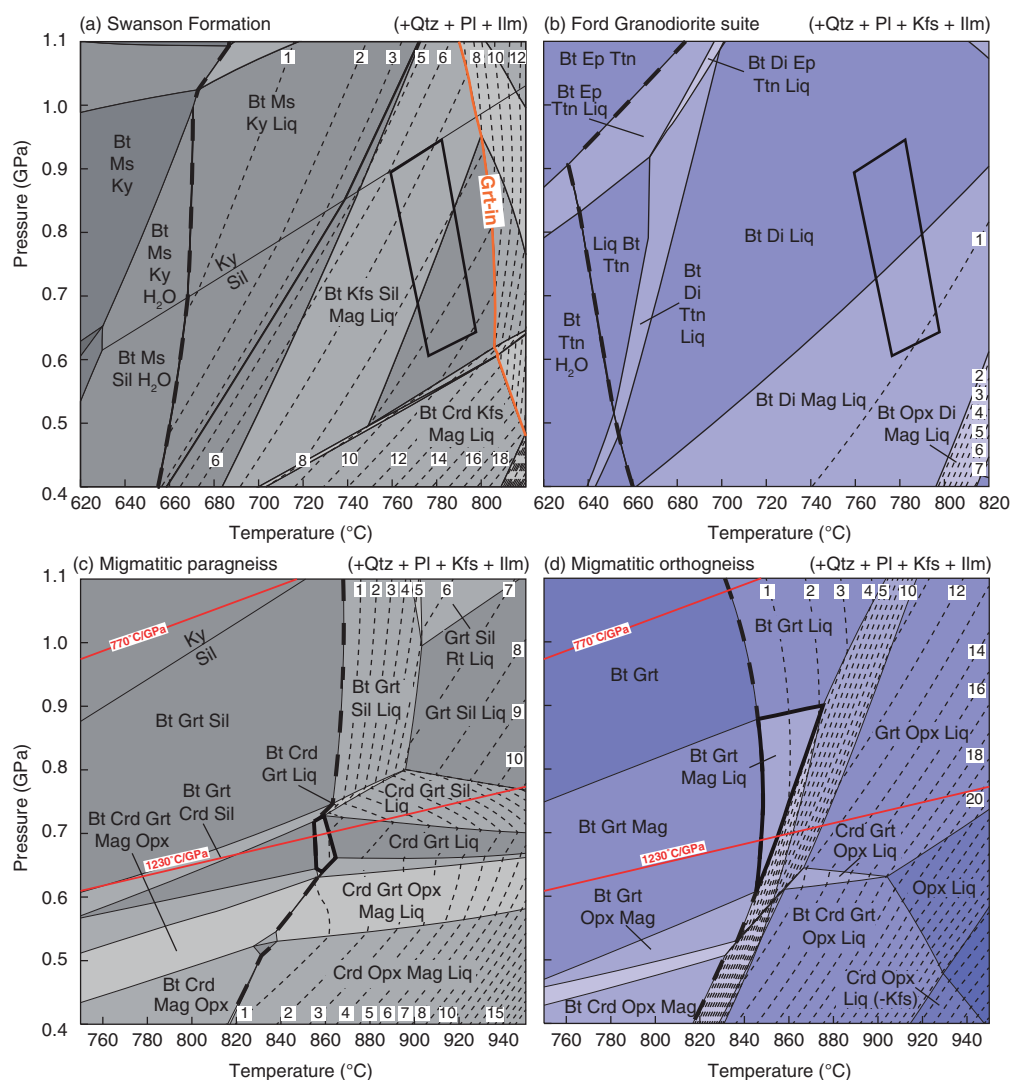

**Fig. 16.** Calculated  $P$ - $T$  pseudosections for a representative composition of (a) Swanson Formation, (b) Ford Granodiorite suite, (c) migmatitic paragneiss and (d) migmatitic orthogneiss. The bold dashed line represents the solidus and the fine dashed lines represent melt isopleths in mol %  $\sim$ vol. %. The fields outlined by the bold black lines represent the range of peak  $P$ - $T$  conditions estimated for the Devonian–Carboniferous metamorphism (Yakymchuk *et al.*, 2015b) in (a) and (b), and the range of  $P$ - $T$  conditions estimated for the final solidus assemblage during the Cretaceous event in (c) and (d). In (c) and (d) bold continuous lines indicate the assumed thermal gradient (770°C GPa<sup>-1</sup>) for thickened crust in Marie Byrd Land prior to crustal thinning associated with the exhumation of the Fostick Complex and an average thermal gradient through the  $P$ - $T$  conditions estimated for the final solidus assemblage after decompression (1230°C GPa<sup>-1</sup>) from Yakymchuk *et al.* (2013b).

garnet and biotite schlieren are observed locally in the smaller granite bodies and at the edges of the larger granites comprising the network of transport conduits cutting through the migmatitic gneisses. These features suggest that entrainment of peritectic garnet could have contributed to the elevated HREE patterns in some of the Cretaceous garnet-bearing granites (Fig. 12).

Although outcrop observations support some peritectic mineral entrainment, it is important to evaluate if the major element chemistry of the granites in the Fostick complex reflects this process. The relationship between source rocks and granites is evaluated using the ternary molar (Na + Ca)–(Fe\* + Mg + Ti)–K diagram in Fig. 17 (Solar & Brown, 2001). As no melting experiments have been conducted on either the Swanson

Formation or the Ford Granodiorite suite, experimental melt compositions from Skjerlie *et al.* (1993), Patiño Douce & Harris (1998) and Koester *et al.* (2002) are used as analogs based on similarity in chemical composition of their starting materials to the Fostick complex source compositions (Fig. 17). The experimental melts from Skjerlie *et al.* (1993) represent proxies for melts derived from the Ford Granodiorite suite, whereas the experimental results of Patiño Douce & Harris (1998) and Koester *et al.* (2002) represent proxies for melts derived from the Swanson Formation. These glass compositions are used to represent the melt compositions generated by anatexis of the Ford Granodiorite suite and the Swanson Formation before any modification.

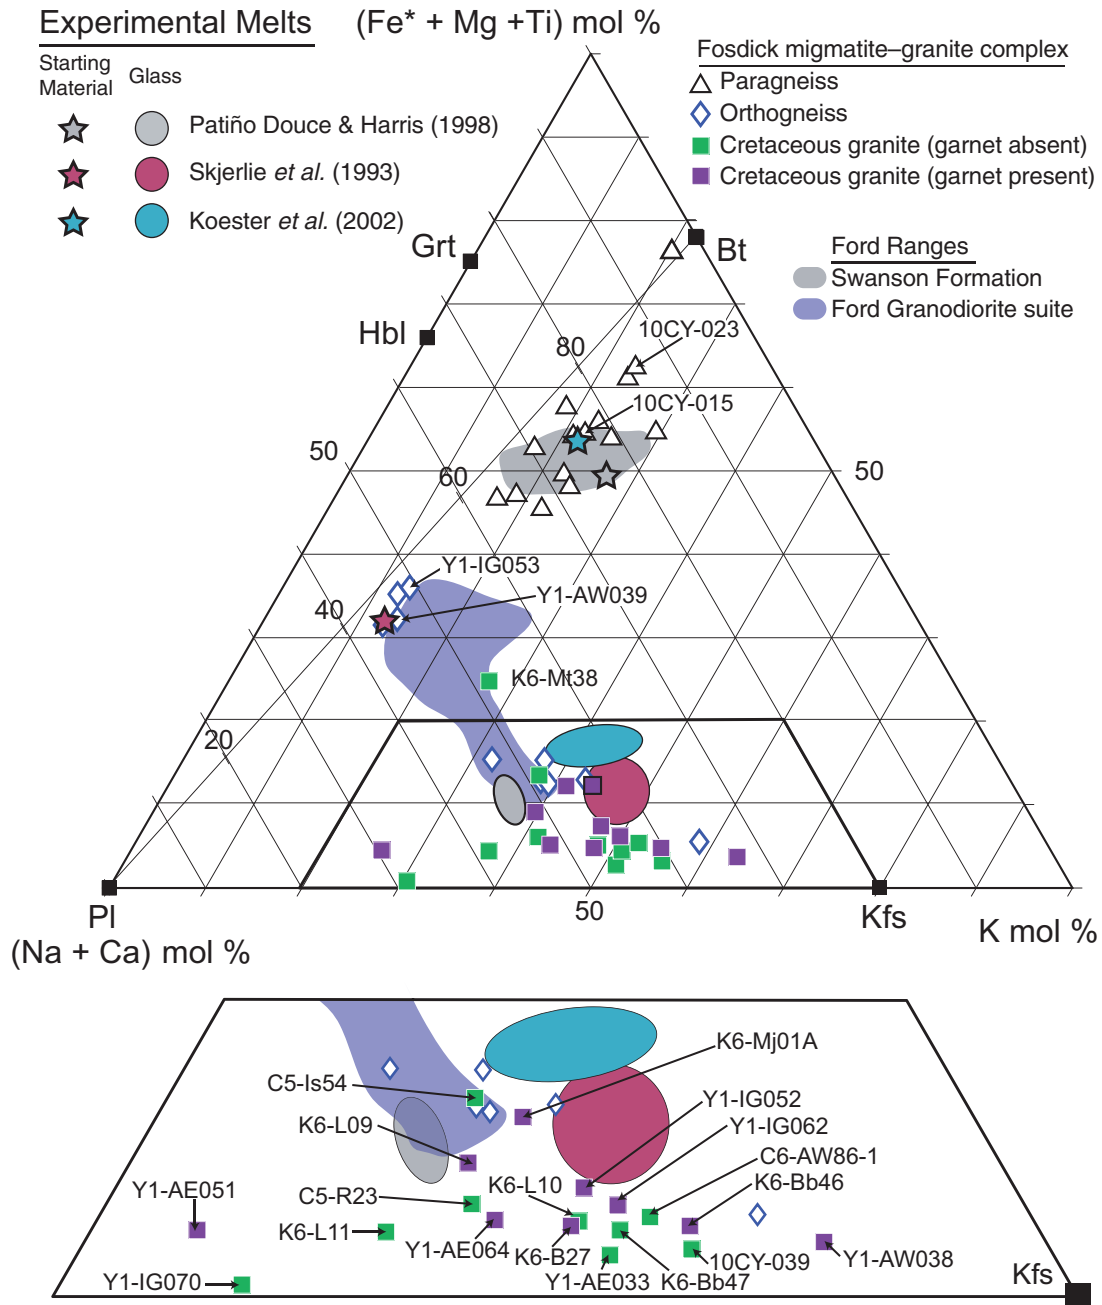

**Fig. 17.** Ternary (Na + Ca)–(Fe\* + Mg + Ti)–K plot (after Solar & Brown, 2001) comparing the compositions of granites from this study with experimental glass compositions (Skjerlie *et al.*, 1993; Patiño Douce & Harris, 1998; Koester *et al.*, 2002). (See text for details.)

None of the granites plot within the fields defined by experimental glass compositions (Fig. 17). Several granites, both garnet-absent and garnet-bearing, plot between the fields defined by the experimental glasses and may represent compositions close to unmodified crustal melts. With the exception of one garnet-absent granite (K6-Mt38), there is no trend among the granites projecting back to either the Ford Granodiorite suite or Swanson Formation source compositions or towards garnet and/or biotite in Fig. 17. We conclude that peritectic and/or residual mineral entrainment was a subordinate process that may have influenced the

composition of some of the garnet-bearing granites, but it was not the dominant process controlling the chemistry of granites within the Fosdick complex.

#### Fractional crystallization

Fractional crystallization is a scale-invariant process that can operate in large magma chambers and in single leucosomes. Accumulation of early crystallized feldspars through fractional crystallization and residual melt extraction has been proposed as the dominant process that controls the compositional evolution of

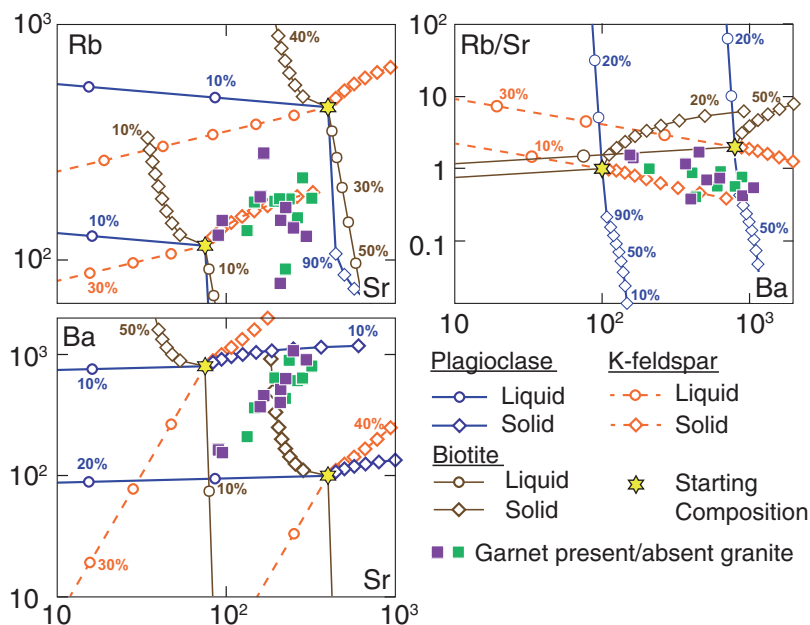

**Fig. 18.** Log–log trace element plots for Rb, Sr, Ba and Rb/Sr showing fractionation trends for K-feldspar, plagioclase and biotite compared with the Cretaceous granites from the Fosdick migmatite–granite complex. The amount of fractional crystallization is shown by 10% increments. Distribution coefficients for Rb, Sr, and Ba in K-feldspar and plagioclase are the average of values reported for each mineral by Nash & Crecraft (1985).

anatectic granites (e.g. Milord & Sawyer, 2003; Solar & Brown, 2001; Morfin *et al.*, 2014).

Granites from the Fosdick complex exhibit cumulate microstructures (Fig. 5) and covariation between  $K_2O$  and  $CaO + Na_2O$  (Fig. 9). This covariation indicates that quartz, sodic plagioclase and K-feldspar were present on the liquidus (Morfin *et al.*, 2014). Bearing in mind that the compositions of most of the granites are displaced towards the K-feldspar–plagioclase join relative to the experimental glass compositions in Fig. 17, these observations are consistent with the early accumulation of plagioclase in the less evolved magmas and K-feldspar in the more evolved magmas (see Morfin *et al.*, 2014). The feldspar microstructures (Fig. 5), the low  $\Sigma REE$  contents and the moderate to large positive Eu anomalies of the granites are consistent with a cumulate origin for many of them.

By projecting from a likely melt composition through each sample onto the K-feldspar–plagioclase edge in the molar  $(Na + Ca) - (Fe^* + Mg + Ti) - K$  diagram (Fig. 17), an estimate may be made of the amount and mode of cumulate material present in each granite (Solar & Brown, 2001; Korhonen *et al.*, 2010b). The cumulate proportions were evaluated relative to the glass compositions from the experiments of Skjerlie *et al.* (1993). Using this method, the Cretaceous granites comprise 30–90% cumulate material composed of variable proportions of K-feldspar (dominant) and plagioclase (subordinate). As pointed out by Morfin *et al.* (2014), the dominance of K-feldspar indicates that the melts were sufficiently evolved owing to early plagioclase fractionation in the source that they were able to crystallize K-feldspar at the level of emplacement. Thus, the melts

are inferred to have been derived from deeper in the crust.

Several granites, both garnet-absent and garnet-bearing, plot between the fields defined by experimental glasses and may represent compositions close to unmodified crustal melts. These granites also plot in the centre of the array of granite compositions in the plot of  $K_2O$  vs  $CaO + Na_2O$  (Fig. 9), and two garnet-absent granites from this group (C5-R23 and C5-Is54) have the highest  $\Sigma REE$  concentrations and only small negative Eu anomalies (Fig. 12). The most plagioclase-rich granite (Y1-AE051) plots at the low- $K_2O$  end of the granite array in the plot of  $K_2O$  vs  $CaO + Na_2O$ , whereas the most K-feldspar-rich granite (Y1-AW038) plots at the high- $K_2O$  end of the array (Fig. 9). Because the granites exhibit early crystallized feldspar (Fig. 5), they cannot be related by simple fractional crystallization and separation of cumulate minerals from evolved melt. It is more likely that the samples of granite represent the cumulate products derived from a variably fractionated melt. Thus, each batch of melt that migrated through the Fosdick complex followed its own fractional crystallization trend, as might be expected from episodic drainage of melt from the suprasolidus crust. Thus, this study adds to the growing body of data supporting the progressive construction of injection complexes and granite plutons (Brown, 2013; Morfin *et al.*, 2013, 2014; Yakymchuk *et al.*, 2013a).

The fractional crystallization model may be evaluated further using the large-ion lithophile elements, as shown in Fig. 18. In Fig. 18, the effects of fractional crystallization of plagioclase, K-feldspar and biotite are shown for two representative starting melt

compositions with Rb, Sr and Ba concentrations of 120 or 400 ppm, 75 or 400 ppm and 100 or 800 ppm, and Rb/Sr ratios of 1 or 2, respectively. Fractional crystallization is modeled using the average of the partition coefficients reported by Nash & Crecraft (1985). For the Cretaceous granites from inside the Fosdick complex, biotite does not play a significant role, and the trends in the data are reproduced satisfactorily by accumulation of dominantly K-feldspar, with only a subordinate role for plagioclase (Fig. 18). Therefore, fractional crystallization appears to have been the major process that controlled the major and trace element concentrations of anatectic granites in the Fosdick complex.

### Source heterogeneity

Chemical and isotopic heterogeneity of source rocks can produce granites with variable compositions (e.g. Hill *et al.*, 1986; Deniel *et al.*, 1987; Pressley & Brown, 1999; Villaros *et al.*, 2012). Both the Swanson Formation and the Ford Granodiorite suite exhibit significant elemental and isotopic heterogeneity. Consequently, extraction of multiple batches of melt generated during anatexis of these sources is also expected to result in significant elemental and isotope heterogeneity. However, if the isotope composition of the granites falls within the range of values for the putative source rocks, then it is reasonable to posit that they were derived from such a source. Next we evaluate the petrogenetic relationship between the anatectic granites and their putative sources in the Fosdick complex using Sr, Nd, Hf and O isotopes.

Figure 13 shows that the Cretaceous granites have whole-rock Sr and Nd isotope compositions that extend from those typical of the Ford Granodiorite suite and the orthogneisses towards values typical for the Swanson Formation and the paragneisses. This suggests that the granites represent variable combinations of melts derived from both sources. One of the garnet-absent granites (C6-AW86-1) was originally argued to be part of the Devonian–Carboniferous suite (Siddoway & Fanning, 2009), but the presence of Cretaceous zircons and its geochemical characteristics indicate that it is likely to be Cretaceous in age.

In Fig. 15 the  $\epsilon_{\text{Hf}}$  values of detrital zircons in the Swanson Formation are recalculated to 100 Ma. The  $\epsilon_{\text{Hf}_{100}}$  values of these zircons vary from  $-3$  to  $-73$ , with a median value of  $-17.5$  and an interquartile range of  $-13.9$  to  $-30.3$ . The  $\delta^{18}\text{O}$  value of zircons that crystallized from melt produced from the Swanson Formation are expected to be  $\sim 8.5$ – $12.0$ ‰, with a mean value of  $10.5$ ‰ (Yakymchuk *et al.*, 2015a). Figure 16 shows that Hf and O isotope data for zircons from samples Y1-IG070, Y1-AW038 and C6-AW86-1 plot within the field defined by the Ford Granodiorite suite, albeit in the sector with more radiogenic  $\epsilon_{\text{Hf}_{100}}$  values and higher  $\delta^{18}\text{O}$  values.

Samples Y1-IG070 and Y1-AW038 have a similar range and mean of  $\epsilon_{\text{Hf}_{100}}$  and  $\delta^{18}\text{O}$  values. In addition, both samples have  $^{87}\text{Sr}/^{86}\text{Sr}$  ratios (recalculated

to 100 Ma) that overlap within uncertainty, but sample Y1-IG070 has an  $\epsilon_{\text{Nd}_{100}}$  value of  $-7.5$  whereas sample Y1-AW038 has a more radiogenic value of  $-5.5$  (Fig. 13). This suggests decoupling of the Nd isotope systematics from the other isotope systems for sample Y1-IG070. Because both granites have similar very low  $\text{P}_2\text{O}_5$  and  $\sum\text{REE}$ , and Th is below detection, decoupling is unlikely to be due to accessory mineral behavior in the source. We speculate that this difference might be due to variable diffusive exchange of Sm and Nd between anatectic melt derived from a Ford Granodiorite suite source and the Swanson Formation during melt transport and emplacement. In contrast, although zircons from sample Y1-IG062 have a similar range of  $\epsilon_{\text{Hf}_{100}}$  values to the other two granites, many plot at values of  $\delta^{18}\text{O}$  slightly above the Ford Granodiorite suite field (Fig. 15b). Nonetheless, the Hf and O isotope values of zircon from this sample are within uncertainty of the field defined by values from the Ford Granodiorite suite. Based on the Hf and O isotope data, it is permissible that all three granites were derived from this source.

However, the Sr and Nd isotope data suggest some contribution of melt from the Swanson Formation to the granites (Fig. 13). Considering the large Hf and O isotope heterogeneity of the Ford Granodiorite suite, we cannot exclude the possibility that the granites were sourced from a juvenile member of the Ford Granodiorite suite that mixed with melt derived from the Swanson Formation. This hypothesis is evaluated in the next section.

### Magma mixing

More than two-thirds of the granites analyzed from the Fosdick complex have Sr and Nd isotope values that lie between those of the two putative sources. To evaluate the relative contribution of these sources to the final composition of the granites, binary mixing lines were calculated using the Sr and Nd concentrations and calculated initial ratios of more and less radiogenic end-members of the Swanson Formation and the Ford Granodiorite suite (Fig. 13). These binary mixing lines also enclose the Sr and Nd isotope values for most of the orthogneisses and paragneisses (Fig. 13). For four of the Cretaceous granites, the Sr and Nd isotope compositions are consistent with being derived solely from a source similar to the Ford Granodiorite suite, whereas the Sr and Nd isotope compositions of the remainder allow a contribution of up to 40% melt derived from a source similar to the Swanson Formation.

Limits may also be placed on the amount of Swanson Formation (or paragneiss) that might have been involved in the petrogenesis of these granites using the  $\epsilon_{\text{Hf}_{100}}$  and  $\delta^{18}\text{O}$  zircon data discussed above. To account for source heterogeneity, Fig. 15b shows binary mixing lines that connect representative end-member compositions for the Swanson Formation and the Ford Granodiorite suite. Two scenarios are modeled, one in which anatectic melt derived from the Ford Granodiorite suite is mixed with



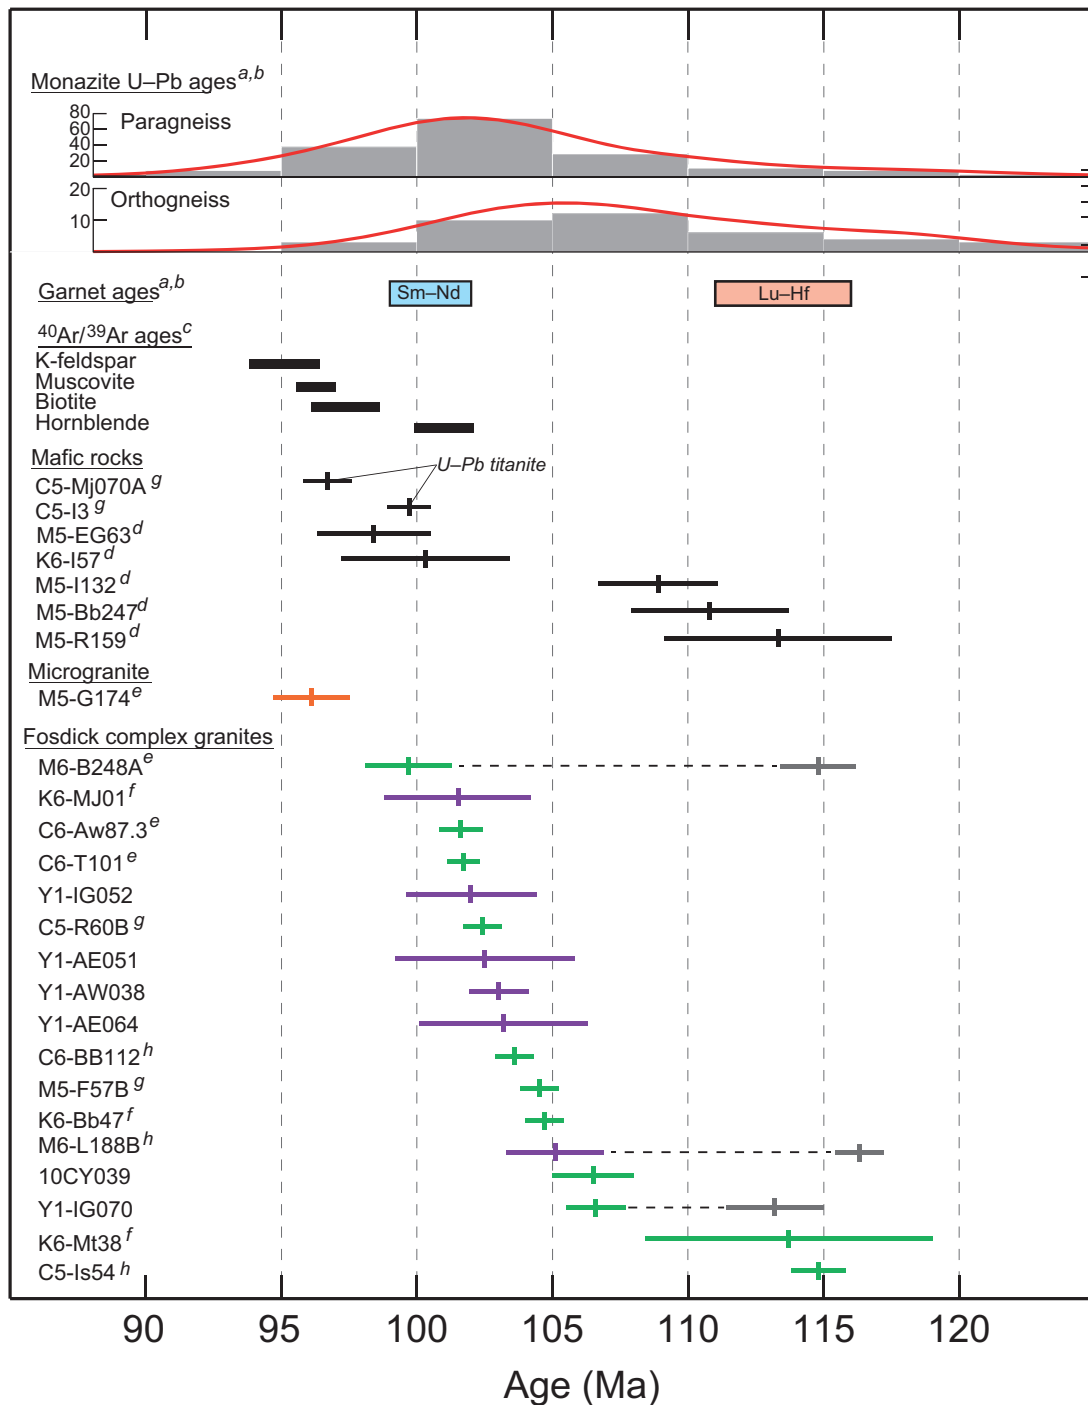

**Fig. 19.** Compilation of geochronological data for rocks from the Fossdick migmatite–granite complex. Data sources as follows: <sup>a</sup>Korhonen *et al.* (2012); <sup>b</sup>Yakymchuk *et al.* (2015b); <sup>c</sup>Richard *et al.* (1994); <sup>d</sup>Saito *et al.* (2013); <sup>e</sup>Yakymchuk *et al.* (2013b); <sup>f</sup>Korhonen *et al.* (2010b); <sup>g</sup>McFadden *et al.* (2010a); <sup>h</sup>McFadden *et al.* (2010b).

anatectic melt derived from the Swanson Formation, and another in which it is mixed with Swanson Formation en masse by assimilation. The curvature of the mixing lines is most sensitive to the relative concentrations of Hf in each of the end-members. For the Swanson Formation, an average whole-rock concentration of 3.2 ppm Hf was assigned, based on bulk chemical analyses (Korhonen *et al.*, 2010a). For anatectic melt derived from the Swanson Formation or the Ford Granodiorite suite, a

concentration of 1.0 ppm is used (e.g. Yakymchuk *et al.*, 2013b). Within uncertainty, zircons from the Cretaceous granites plot in the field bounded by the two mixing lines. If anatectic melt derived from the Ford Granodiorite suite mixed with anatectic melt derived from the Swanson Formation, then the maximum contribution from the latter is 30% (Fig. 15b). By contrast, for en masse assimilation of the Swanson Formation, the limit is 10% (Fig. 15b).

In the above model no juvenile input is required. However, a juvenile input cannot be ruled out by the isotope data alone, as blending melts from an appropriate mantle source and an upper crustal source similar to the Swanson Formation will also yield compositions that enclose the data shown in Fig. 15, as discussed for Devonian–Carboniferous granites in the Fosdick complex by Yakymchuk *et al.* (2015a). However, as there is no evidence of any juvenile input, the parsimonious interpretation favours derivation of the granites from the putative crustal sources. Furthermore, the inferences from the Sr, Nd, Hf and O isotope data, which require a larger component derived from a source similar to the Ford Granodiorite suite and a smaller component derived from a source similar to the Swanson Formation, are consistent with the predictions about melt sources based on the phase equilibria modeling discussed above (Fig. 16).

### Cumulate granites in migmatitic gneiss domes

The variable major oxide and trace element chemistry (Figs 9 and 10), relatively low Rb/Sr ratios, dominance of pronounced positive Eu anomalies (Fig. 12) and location close to the K-feldspar–plagioclase edge of the molar (Na + Ca)–(Fe\* + Mg + Ti)–K diagram (Fig. 17) for many of the granites are features consistent with fractional crystallization and accumulation of feldspar. Granites forming subhorizontal sheets and discordant networks in the Fosdick complex commonly contain coarse euhedral feldspars, consistent with a cumulate origin. However, the covariation between K<sub>2</sub>O and CaO + Na<sub>2</sub>O for these granites indicates fractionation of feldspar during transport from the source prior to entrapment at their present structural level within the complex. This process may involve continuous separation of feldspar from the evolving liquid in the manner proposed by Morfin *et al.* (2014), and might be the mechanism that operated in the granite networks within the deeper crust of the Fosdick complex. However, after entrapment, melt drainage from the crystallizing granites within the Fosdick complex appears to have been related to dome formation, particularly in the sheeted leucogranite complex immediately below the South Fosdick detachment system. These granites are interpreted to record the collapse of subhorizontal partially crystallized layers of magma by filter pressing (e.g. Brown *et al.*, 1995) during vertical shortening associated with normal-sense displacement across the South Fosdick detachment system and dome exhumation, leaving behind cumulate-rich residues. The evolved melt probably drained to shallow crustal levels and the resulting granites may have been lost to erosion. Some of this evolved melt may be preserved in the Byrd Coast granite suite, as discussed by Korhonen *et al.* (2010b).

The Cretaceous granites in the Fosdick complex crystallized between 115 and 100 Ma, with a dominant grouping at 107–100 Ma (Fig. 19). Syntectonic granites in the South Fosdick detachment zone yield U–Pb zircon

ages of 109–102 Ma (McFadden *et al.*, 2010a). This time frame corresponds to a period of transition in regional tectonics from oblique convergence to oblique extension that facilitated dome formation and exhumation of the complex (Siddoway *et al.* 2005, 2008; McFadden *et al.*, 2010a, 2010b). Exhumation was probably a fast process. The full set of geochronological data now available for the complex is compiled in Fig. 19, from which it is clear that the main period of granite crystallization (107–100 Ma) coincides with the younger period of emplacement of mafic dykes during lithosphere extension (Saito *et al.*, 2013). In addition, these granite ages overlap the younger part of the range of U–Pb metamorphic ages retrieved from monazite, the post-peak Sm–Nd ages retrieved from garnet, and the <sup>40</sup>Ar/<sup>39</sup>Ar ages retrieved from hornblende (Fig. 19). These concordant ages suggest rapid cooling and exhumation of the Fosdick complex at c. 100 Ma. Dome formation and exhumation of the middle crust is confirmed by the correspondence between crystallization ages of the younger mafic dykes and the <sup>40</sup>Ar/<sup>39</sup>Ar ages retrieved from biotite, muscovite and K-feldspar (Fig. 19).

The results of this study contribute to a growing body of work that suggests that leucosomes in migmatites and associated granites represent accumulations of feldspar and do not reflect primary crustal melt compositions (e.g. Cuney & Barbey, 1982; Sawyer, 1987; Milord *et al.*, 2001; Solar & Brown, 2001; Johannes *et al.*, 2003; Korhonen *et al.*, 2010b; Morfin *et al.*, 2014). There are two important implications if granites in migmatitic gneiss domes are typically cumulate. First, it is possible that the accumulation of early crystallized minerals in magma transport conduits may restrict the flow of melt and even locally choke the plumbing system. This possibility may need to be considered as a rate-limiting step in estimating the timescales of melt extraction from the deep crust. Second, the drained melt is likely to have a more evolved composition than that represented by melt inclusions in migmatites and, in particular, it is likely to have higher concentrations of the heat-producing elements. This will have important implications for the tectonic history of large hot mountain belts (Jamieson *et al.*, 2011), cooling ultrahigh-temperature (UHT) metamorphic terranes (Korhonen *et al.*, 2013), priming the crust for future UHT metamorphic events (Brown & Korhonen, 2009; Clark *et al.*, 2011), the particular style of some Proterozoic ‘hot’ orogens (McLaren & Powell, 2014), and the long-term stability of the continental crust (Sandiford & McLaren, 2002).

### CONCLUSIONS

In the Fosdick migmatite–granite complex of Marie Byrd Land in West Antarctica, Cretaceous granites have Sr, Nd, Hf and O isotope compositions consistent with derivation from regional sources that display significant

isotope heterogeneity. The major oxide and trace element concentrations of the granites are highly variable; they reflect fractional crystallization and the accumulation of early crystallized feldspar during magma ascent and emplacement. This conclusion is supported by the cumulate microstructures, low  $\Sigma$ REE contents and common positive Eu anomalies that characterize the Cretaceous granites in the Fosdick complex. Peritectic mineral entrainment and accessory mineral dissolution, entrainment and crystallization exerted only minimal influence on the elemental variation of these granites.

In a wider context, granites in migmatite complexes typically do not represent melt compositions; they are more likely to be cumulates left after melt drainage. Thus, the amount of granite hosted within migmatitic crust cannot be used as an estimate of melt volume present at any time during the suprasolidus evolution. Conversely, granites that have crystallized at shallower levels in the crust are more likely to represent the complementary fractionated melts with evolved compositions.

## ACKNOWLEDGEMENTS

The authors acknowledge use of facilities in the NanoCenter and the NISP-Lab at the University of Maryland, which is an MRSEC Shared Experimental Facility. The authors thank Richard Ash (Plasma Mass Spectrometry Laboratory) and Igor Puchtel and Richard Walker (Isotope Geochemistry Laboratory) at the University of Maryland for help and guidance with analysis, M. Pecha and M. Ibanez-Mejia for assistance with data collection at the Arizona LaserChron Center (supported by the National Science Foundation under Grant No. EAR1032156), Bin Fu for assistance with sample preparation and analysis at the Australian National University, T. Burton, K. Emery and D. Uhlmann for field logistics and safety, and Kenn Borek Air and Raytheon Polar Services personnel for transportation and logistical support. We thank H. Stowell, F. Farina, E. Sawyer and two anonymous reviewers for thorough and constructive comments, and Jim Beard for editorial comments and advice.

## FUNDING

This work was supported by the US National Science Foundation (ANT0944615 to M.B.; OPP-0338279 and OPP-0944600 to C.S.; and EAR1032156 to Arizona LaserChron Center), the NISPLab at the University of Maryland, and the Geological Society of America (Graduate Research Grant to C.B.). C.Y. was partially funded by a Post-Graduate scholarship and Discovery Grant from the National Science and Engineering Research Council of Canada.

## SUPPLEMENTARY DATA

Supplementary data for this paper are available at *Journal of Petrology* online.

## REFERENCES

- Acosta-Vigil, A., Cesare, B., London, D. & Morgan, G. B., VI (2007). Microstructures and composition of melt inclusions in a crustal anatexic environment, represented by metapelite enclaves within El Hoyazo dacites, SE Spain. *Chemical Geology* **237**, 450–465.
- Adams, C. J. (1986). Geochronological studies of the Swanson Formation of Marie Byrd Land, West Antarctica, and correlation with northern Victoria Land, East Antarctica, and South Island, New Zealand. *New Zealand Journal of Geology and Geophysics* **29**, 345–358.
- Adams, C. J. (1987). Geochronology of granite terranes in the Ford Ranges, Marie Byrd Land, West Antarctica. *New Zealand Journal of Geology and Geophysics* **30**, 54–72.
- Ayres, M. & Harris, N. (1997). REE fractionation and Nd-isotope disequilibrium during crustal anatexis: constraints from Himalayan leucogranites. *Chemical Geology* **139**, 249–269.
- Bartoli, O., Cesare, B., Poli, S., Bodnar, R. J., Acosta-Vigil, A., Frezzotti, M. L. & Meli, S. (2013). Recovering the composition of melt and the fluid regime at the onset of crustal anatexis and S-type granite formation. *Geology* **41**, 115–118.
- Bea, F. (1996). Residence of REE, Y, Th and U in granites and crustal protoliths; implications for the chemistry of crustal melts. *Journal of Petrology* **37**, 521–552.
- Black, L. P., Kamo, S. L., Allen, C. M., Aleinikoff, J. N., Davis, D. W., Korsch, R. J. & Foudoulis, C. (2003). TEMORA 1: a new zircon standard for Phanerozoic U–Pb geochronology. *Chemical Geology* **200**, 155–170.
- Bouvier, A., Vervoort, J. D. & Patchett, P. J., (2008). The Lu–Hf and Sm–Nd isotopic composition of CHUR: constraints from unequilibrated chondrites and implications for the bulk composition of terrestrial planets. *Earth and Planetary Science Letters* **273**, 48–57.
- Boyd, F. R. & Mertzman, S. (1987). Composition and structure of the Kaapvaal lithosphere, Southern Africa. In: Mysen, B. O. (ed.) *Magmatic Processes: Physicochemical Principles, Geochemical Society Special Publication* **1**, 13–24.
- Brown, M. (2010). Melting of the continental crust during orogenesis: the thermal, rheological, and compositional consequences of melt transport from lower to upper continental crust. *Canadian Journal of Earth Sciences* **47**, 655–694.
- Brown, M. (2013). Granite: from genesis to emplacement. *Geological Society of America Bulletin* **125**, 1079–1113.
- Brown, M. & Korhonen, F. J. (2009). Some remarks on melting and extreme metamorphism of crustal rocks. In: Dasgupta, S. (ed.) *Physics and Chemistry of the Earth*. New York: Springer, pp. 67–87.
- Brown, M., Averkin, Y. A., McLellan, E. L. & Sawyer, E. W. (1995). Melt segregation in migmatites. *Journal of Geophysical Research* **100**, 15655–15679.
- Brown, M. A., Brown, M., Carlson, W. D. & Denison, C. (1999). Topology of syntectonic melt flow networks in the deep crust: inferences from three-dimensional images of leucosome geometry in migmatites. *American Mineralogist* **84**, 1793–1818.
- Cesare, B., Maineri, C., Baron Toaldo, A., Pedron, D. & Acosta Vigil, A. (2007). Immiscibility between carbonic fluids and granitic melts during crustal anatexis: A fluid and melt inclusion study in the enclaves of the Neogene Volcanic Province of SE Spain. *Chemical Geology* **237**, 433–449.
- Clark, C., Fitzsimons, I. C., Healy, D. & Harley, S. L. (2011). How does the continental crust get really hot? *Elements* **7**, 235–240.
- Clemens, J. D. & Stevens, G. (2012). What controls chemical variation in granitic magmas? *Lithos* **134–135**, 317–329.
- Clemens, J. D., Stevens, G., Farina, F. (2011). The enigmatic sources of I-type granites: The peritectic connexion. *Lithos* **126**, 174–181.

- Coggon, R. & Holland, T. J. B. (2002). Mixing properties of phengitic micas and revised garnet–phengite thermobarometers. *Journal of Metamorphic Geology* **20**, 683–696.
- Cuney, M. & Barbey, P. (1982). Mise en évidence de phénomènes de cristallisation fractionnée dans les migmatites. *Comptes Rendus des Séances de l'Académie des Sciences, Série* **295**, 37–42.
- Deniel, C., Vidal, P., Fernandez, A., Le Fort, P. & Peucat, J.-J. (1987). Isotopic study of the Manaslu granite (Himalaya, Nepal): inferences on the age and source of Himalayan leucogranites. *Contributions to Mineralogy and Petrology* **96**, 78–92.
- Diener, J. F. A., Powell, R., White, R. W. & Holland, T. J. B. (2007). A new thermodynamic model for clino- and orthoamphiboles in the system  $\text{Na}_2\text{O}$ – $\text{CaO}$ – $\text{FeO}$ – $\text{MgO}$ – $\text{Al}_2\text{O}_3$ – $\text{SiO}_2$ – $\text{H}_2\text{O}$ – $\text{O}$ . *Journal of Metamorphic Geology* **25**, 631–656.
- Diener, J. F. A., White, R. W. & Powell, R. (2008). Granulite facies metamorphism and subsolidus fluid-absent reworking, Strangways Range, Arunta Block, central Australia. *Journal of Metamorphic Geology* **26**, 603–622.
- Elburg, M. A. (1996). Evidence of isotopic equilibration between microgranitoid enclaves and host granodiorite, Warburton Granodiorite, Lachlan Fold Belt, Australia. *Lithos* **38**, 1–22.
- Ferraccioli, F., Bozzo, E. & Damaske, D. (2002). Aeromagnetic signatures over western Marie Byrd Land provide insight into magmatic arc basement, mafic magmatism and structure of the Eastern Ross Sea Rift flank. *Tectonophysics* **347**, 139–165.
- Ferrero, S., Bodnar, R. J., Cesare, B. & Viti, C. (2011). Re-equilibration of primary fluid inclusions in peritectic garnet from metapelitic enclaves, El Hoyazo, Spain. *Lithos* **124**, 117–131.
- Ferrero, S., Bartoli, O., Cesare, B., Salvioli-Mariani, E., Acosta-Vigil, A., Cavallo, A., Groppo, C. & Battiston, S. (2012). Microstructures of melt inclusions in anatectic metasedimentary rocks. *Journal of Metamorphic Geology* **30**, 303–322.
- Ferrero, S., Braga, R., Berkesi, M., Cesare, B. & Laridhi Ouazaa, N. (2014). Production of metaluminous melt during fluid-present anatexis: an example from the Maghrebian basement, La Galite Archipelago, central Mediterranean. *Journal of Metamorphic Geology* **32**, 209–225.
- Gehrels, G. E., Valencia, V. A. & Ruiz, J. (2008). Enhanced precision, accuracy, efficiency, and spatial resolution of U–Pb ages by laser ablation–multicollector–inductively coupled plasma–mass spectrometry. *Geochemistry, Geophysics, Geosystems* **9**, Q03017.
- Green, E., Holland, T. & Powell, R. (2007). An order–disorder model for omphacitic pyroxenes in the system jadeite–diopside–hedenbergite–acmite, with applications to eclogitic rocks. *American Mineralogist* **92**, 1181–1189.
- Hill, R. I., Silver, L. T. & Taylor, H. P., Jr (1986). Coupled Sr–O isotope variations as an indicator of source heterogeneity for the Northern Peninsular Ranges batholith. *Contributions to Mineralogy and Petrology* **92**, 351–361.
- Holland, T. & Powell, R. (2003). Activity–composition relations for phases in petrological calculations: an asymmetric multi-component formulation. *Contributions to Mineralogy and Petrology* **145**, 492–501.
- Holland, T. J. B. & Powell, R. (1998). An internally consistent thermodynamic data set for phases of petrological interest. *Journal of Metamorphic Geology* **16**, 309–343.
- Ickert, R. B., Hiess, J., Williams, I. S., Holden, P., Ireland, T. R., Lanc, P., Schram, N., Foster, J. J. & Clement, S. W. (2008). Determining high precision, *in situ*, oxygen isotope ratios with a SHRIMP II: Analyses of MPI-DING silicate-glass reference materials and zircon from contrasting granites. *Chemical Geology* **257**, 114–128.
- Jamieson, R. A., Unsworth, M. J., Harris, N. B. W., Rosenberg, C. L. & Schulmann, K. (2011). Crustal melting and the flow of mountains. *Elements* **7**, 253–260.
- Johannes, W., Ehlers, C., Kriegsman, L. M. & Mengel, K. (2003). The link between migmatites and S-type granites in the Turku area, southern Finland. *Lithos* **68**, 69–90.
- Kemp, A. I. S., Hawkesworth, C. J., Foster, G. L., Paterson, B. A., Woodhead, J. D., Hergt, J. M., Gray, C. M. & Whitehouse, M. J. (2007). Magmatic and crustal differentiation history of granitic rocks from Hf–O isotopes in zircon. *Science* **315**, 980–983.
- Koester, E., Pawley, A. R., Fernandes, L. A. D., Porcher, C. C. & Soiani, E. (2002). Experimental melting of cordierite gneiss and the petrogenesis of syntranscurrent peraluminous granites in southern Brazil. *Journal of Petrology* **43**, 1595–1616.
- Korhonen, F. J., Saito, S., Brown, M. & Siddoway, C. S. (2010a). Modelling multiple melt loss events in the evolution of an active continental margin. *Lithos* **116**, 230–248.
- Korhonen, F. J., Saito, S., Brown, M., Siddoway, C. S. & Day, J. M. D. (2010b). Multiple generations of granite in the Fosdick Mountains, Marie Byrd Land, West Antarctica: implications for polyphase intracrustal differentiation in a continental margin setting. *Journal of Petrology* **51**, 627–670.
- Korhonen, F. J., Brown, M., Grove, M., Siddoway, C. S., Baxter, E. F. & Inglis, J. D. (2012). Separating metamorphic events in the Fosdick migmatite–granite complex, West Antarctica. *Journal of Metamorphic Geology* **30**, 165–192.
- Korhonen, F. J., Clark, C., Brown, M., Bhattacharya, S. & Taylor, R. (2013). How long-lived is ultrahigh temperature (UHT) metamorphism? Constraints from zircon and monazite geochronology in the Eastern Ghats orogenic belt, India. *Precambrian Research* **234**, 322–350.
- Leshner, C. E. (1994). Kinetics of Sr and Nd exchange in silicate liquids: Theory, experiments, and applications to uphill diffusion, isotopic equilibration, and irreversible mixing of magmas. *Journal of Geophysical Research* **99**, 9585–9604.
- Ludwig, K. R. (2001). *User's guide to SQUID 2.2*. Berkeley, CA: Berkeley Geochronology Center, Special Publication 2.
- Ludwig, K. R. (2003). *User's manual for ISOPLOT 3*, A Geochronological Toolkit for Microsoft Excel. Berkeley Geochronology Center, Special Publication 4.
- Luyendyk, B. P., Wilson, D. S. & Siddoway, C. S. (2003). Eastern margin of the Ross Sea Rift in western Marie Byrd Land, Antarctica: Crustal structure and tectonic development. *Geochemistry, Geophysics, Geosystems* **4**, 1090.
- McDonough, W. F. & Sun, S.-s. (1995). The composition of the Earth. *Chemical Geology* **120**, 223–254.
- McFadden, R. R., Siddoway, C. S., Teyssier, C. & Fanning, C. M. (2010a). Cretaceous oblique extensional deformation and magma accumulation in the Fosdick Mountains migmatite-cored gneiss dome, West Antarctica. *Tectonics* **29**, TC4022.
- McFadden, R. R., Teyssier, C., Siddoway, C. S., Whitney, D. L. & Fanning, C. M. (2010b). Oblique dilation, melt transfer, and gneiss dome emplacement. *Geology* **38**, 375–378.
- McLaren, S. & Powell, R. (2014). Magmatism, orogeny and the origin of high-heat-producing granites in Australian Proterozoic terranes. *Journal of the Geological Society, London* **171**, 149–152.
- Milord, I. & Sawyer, E. (2003). Schlieren formation in diatexite migmatite: examples from the St Malo migmatite terrane, France. *Journal of Metamorphic Geology* **21**, 347–362.
- Milord, I., Sawyer, E. W. & Brown, M. (2001). Formation of diatexite migmatite and granite magma during anatexis of semi-pelitic metasedimentary rocks: an example from St. Malo, France. *Journal of Petrology* **42**, 487–505.
- Morfin, S., Sawyer, E. W. & Bandyayera, D. (2013). Large volumes of anatectic melt retained in granulite facies

- migmatites: An injection complex in northern Quebec. *Lithos* **168–169**, 200–218.
- Morfin, S., Sawyer, E. W. & Bandyayera, D. (2014). The geochemical signature of a felsic injection complex in the continental crust: Opinaca Subprovince, Quebec. *Lithos* **196–197**, 339–355.
- Mukasa, S. B. & Dalziel, I. W. D. (2000). Marie Byrd Land, West Antarctica: Evolution of Gondwana's Pacific margin constrained by zircon U–Pb geochronology and feldspar common-Pb isotopic compositions. *Geological Society of America Bulletin* **112**, 611–627.
- Munizaga, F., Maksav, V., Fanning, C. M., Giglio, S., Yaxley, G. & Tassinari, C. C. G. (2008). Late Paleozoic–Early Triassic magmatism on the western margin of Gondwana: Collahuasi area, Northern Chile. *Gondwana Research* **13**, 407–427.
- Nash, W. P. & Crecraft, H. R. (1985). Partition coefficients for trace elements in silicic magmas. *Geochimica et Cosmochimica Acta* **49**, 2309–2322.
- Pankhurst, R. J., Weaver, S. D., Bradshaw, J. D., Storey, B. C. & Ireland, T. R. (1998). Geochronology and geochemistry of pre-Jurassic superterraces in Marie Byrd Land, Antarctica. *Journal of Geophysical Research* **103**, 2529–2547.
- Patiño Douce, A. E. & Harris, N. B. W. (1998). Experimental constraints on Himalayan anatexis. *Journal of Petrology* **39**, 689–710.
- Powell, R. & Holland, T. J. B. (1988). An internally consistent dataset with uncertainties and correlations: 3. Applications to geobarometry, worked examples and a computer program. *Journal of Metamorphic Geology* **6**, 173–204.
- Pressley, R. A. & Brown, M. (1999). The Phillips pluton, Maine, USA: evidence of heterogeneous crustal sources and implications for granite ascent and emplacement mechanisms in convergent orogens. *Lithos* **46**, 335–366.
- Richard, S. M., Smith, C. H., Kimbrough, D. L., Fitzgerald, P. G., Luyendyk, B. P. & McWilliams, M. O. (1994). Cooling history of the northern Ford Ranges, Marie Byrd Land, West Antarctica. *Tectonics* **13**, 837–857.
- Rosenberg, C. L. & Handy, M. R. (2005). Experimental deformation of partially melted granite revisited: implications for the continental crust. *Journal of Metamorphic Geology* **23**, 19–28.
- Saito, S., Brown, M., Korhonen, F. J., McFadden, R. R. & Siddoway, C. S. (2013). Petrogenesis of Cretaceous mafic intrusive rocks, Fosdick Mountains, West Antarctica: Melting of the sub-continental arc mantle along the Gondwana margin. *Gondwana Research* **23**, 1567–1580.
- Sambridge, M. S. & Compston, W. (1994). Mixture modeling of multi-component data sets with application to ion-probe zircon ages. *Earth and Planetary Science Letters* **128**, 373–390.
- Sandiford, M. & McLaren, S. (2002). Tectonic feedback and the ordering of heat producing elements within the continental lithosphere. *Earth and Planetary Science Letters* **204**, 133–150.
- Sawyer, E. (1991). Disequilibrium melting and the rate of melt-residuum separation during migmatization of mafic rocks from the Grenville Front, Quebec. *Journal of Petrology* **32**, 701–738.
- Sawyer, E. W. (1987). The role of partial melting and fractional crystallization in determining discordant migmatite leucosome compositions. *Journal of Petrology* **28**, 445–473.
- Sawyer, E. W., Cesare, B. & Brown, M. (2011). When the continental crust melts. *Elements* **7**, 229–234.
- Siddoway, C. (2008). Tectonics of the West Antarctic Rift System: new light on the history and dynamics of distributed intracontinental extension. In: Cooper, A. K., Barrett, P. J., Stagg, H., Storey, B., Stump, E. & Wise, W. (eds) *Antarctica: A Keystone in a Changing World*. Washington, DC: National Academies Press, pp. 91–114.
- Siddoway, C. S. & Fanning, C. M. (2009). Paleozoic tectonism on the East Gondwana margin: Evidence from SHRIMP U–Pb zircon geochronology of a migmatite–granite complex in West Antarctica. *Tectonophysics* **477**, 262–277.
- Siddoway, C. S., Richard, S. M., Fanning, C. M. & Luyendyk, B. P. (2004). Origin and emplacement of a middle Cretaceous gneiss dome, Fosdick Mountains, West Antarctica. In: Whitney, D. L., Teyssier, C. & Siddoway, C. S. (eds) *Gneiss Domes in Orogeny*. Geological Society of America, *Special Papers* **380**, 267–294.
- Siddoway, C. S., Sass, L. C., III & Esser, R. (2005). Kinematic history of Marie Byrd Land terrane, West Antarctica: Direct evidence from Cretaceous mafic dykes. In: Vaughan, A. P. M., Leat, P. T. & Pankhurst, R. K. (eds) *Terrane Processes at the Margin of Gondwana*. Geological Society, London, *Special Publications* **246**, 417–438.
- Skjerlie, K. P., Patiño Douce, A. E. & Johnston, A. D. (1993). Fluid absent melting of a layered crustal protolith: implications for the generation of anatectic granites. *Contributions to Mineralogy and Petrology* **114**, 365–378.
- Söderlund, U., Patchett, P. J., Vervoort, J. D., Isachsen, C. E., (2004). The decay constant of <sup>176</sup>Lu determined from Lu–Hf and U–Pb isotope systematics of terrestrial Precambrian high-temperature mafic intrusions. *Earth and Planetary Science Letters* **219**, 311–324.
- Solar, G. S. & Brown, M. (2001). Petrogenesis of migmatites in Maine, USA: Possible source of peraluminous leucogranite in plutons? *Journal of Petrology* **42**, 789–823.
- Taylor, J. & Stevens, G. (2010). Selective entrainment of peritectic garnet into S-type granitic magmas: evidence from Archaean mid-crustal anatectites. *Lithos* **120**, 277–292.
- Tera, F. & Wasserburg, G. J. (1972). U–Th–Pb systematics in three Apollo 14 basalts and the problem of initial Pb in lunar rocks. *Earth and Planetary Science Letters* **14**, 281–304.
- Tulloch, A. J., Ramezani, J., Kimbrough, D. L., Faure, K. & Allibone, A. H. (2009a). U–Pb geochronology of mid-Paleozoic plutonism in western New Zealand: Implications for S-type granite generation and growth of the east Gondwana margin. *Geological Society of America Bulletin* **121**, 1236–1261.
- Tulloch, A. J., Ramezani, J., Mortimer, N., Mortensen, J., van den Bogaard, P. & Maas, R. (2009b). Cretaceous felsic volcanism in New Zealand and Lord Howe Rise (Zealandia) as a precursor to final Gondwana break-up. In: Ring, U. & Wernicke, B. (eds) *Extending a Continent: Architecture, Rheology and Heat Budget*. Geological Society, London, *Special Publications* **321**, 89–118.
- Valley, J. W., Kinny, P. D., Schulze, D. J. & Spicuzza, M. J. (1998). Zircon megacrysts from kimberlite: oxygen isotope variability among mantle melts. *Contributions to Mineralogy and Petrology* **133**, 1–11.
- Veevers, J. J. (2012). Reconstructions before rifting and drifting reveal the geological connections between Antarctica and its conjugates in Gondwanaland. *Earth-Science Reviews* **111**, 249–318.
- Villaros, A., Stevens, G., Moyen, J.-F. & Buick, I. (2009). The trace element compositions of S-type granites: evidence for disequilibrium melting and accessory phase entrainment in the source. *Contributions to Mineralogy and Petrology* **158**, 543–561.
- Villaros, A., Buick, I. S., Stevens, G. (2012). Isotopic variations in S-type granites: an inheritance from a heterogeneous source? *Contributions to Mineralogy and Petrology* **163**, 243–257.

- Watt, G. R. & Harley, S. L. (1993). Accessory phase controls on the geochemistry of crustal melts and restites produced during water-undersaturated partial melting. *Contributions to Mineralogy and Petrology* **114**, 550–566.
- Weaver, S. D., Bradshaw, J. D. & Adams, C. J. (1991). Granitoids of the Ford Ranges, Marie Byrd Land, Antarctica. In: Thompson, M. R. A., Grame, J. A. & Thompson, J. W. (eds) *Geological Evolution of Antarctica*. Cambridge: Cambridge University Press, pp. 345–351.
- Weaver, S. D., Adams, C. J., Pankhurst, R. J. & Gibson, I. L. (1992). Granites of Edward VII Peninsula, Marie Byrd Land: anorogenic magmatism related to Antarctic–New Zealand rifting. *Transactions of the Royal Society of Edinburgh: Earth Sciences* **83**, 281–290.
- Weaver, S. D., Storey, B. C., Pankhurst, R. J., Mukasa, S. B., DiVenere, V. J. & Bradshaw, J. D. (1994). Antarctica–New Zealand rifting and Marie Byrd Land lithospheric magmatism linked to ridge subduction and mantle plume activity. *Geology* **22**, 811–814.
- White, R. W. & Powell, R. (2002). Melt loss and the preservation of granulite facies mineral assemblages. *Journal of Metamorphic Geology* **20**, 621–632.
- White, R. W., Powell, R., Holland, T. J. B., Worley, B. A., (2000). The effect of TiO<sub>2</sub> and Fe<sub>2</sub>O<sub>3</sub> on metapelitic assemblages at greenschist and amphibolite facies conditions: mineral equilibria calculations in the system K<sub>2</sub>O–FeO–MgO–Al<sub>2</sub>O<sub>3</sub>–SiO<sub>2</sub>–H<sub>2</sub>O–TiO<sub>2</sub>–Fe<sub>2</sub>O<sub>3</sub>. *Journal of Metamorphic Geology* **18**, 497–511.
- White, R. W., Powell, R., Holland & Worley (2004). Spatially-focused melt formation in aluminous metapelites from Broken Hill, Australia. *Journal of Metamorphic Geology* **22**, 825–845.
- White, R. W., Pomroy, N. E. & Powell, R. (2005). An *in situ* metatexite–diatexite transition in upper amphibolite facies rocks from Broken Hill, Australia. *Journal of Metamorphic Geology* **23**, 579–602.
- White, R. W., Powell, R. & Holland, T. J. B. (2007). Progress relating to calculation of partial melting equilibria for metapelites. *Journal of Metamorphic Geology* **25**, 511–527.
- White, R. W., Stevens, G. & Johnson, T. E. (2011). Is the crucible reproducible? Reconciling melting experiments with thermodynamic calculations. *Elements* **7**, 241–246.
- Williams, I. S. (1998). U–Th–Pb geochronology by ion microprobe. In: McKibben, M. A., Shanks, W. C. & Ridley, W. I. (eds) *Applications of Microanalytical Techniques to Understanding Mineralizing Processes, Reviews in Economic Geology* **7**, 1–25.
- Woodhead, J. D. and Hergt, J. M. (2005). A preliminary appraisal of seven natural zircon reference materials for *in situ* Hf isotope determination. *Geostandards and Geoanalytical Research* **29**, 183–195.
- Woodhead, J., Hergt, J., Shelley, M., Eggins, S. & Kemp, R. (2004). Zircon Hf-isotope analysis with an excimer laser, depth profiling, ablation of complex geometries, and concomitant age estimation. *Chemical Geology* **209**, 121–135.
- Yakymchuk, C. & Brown, M. (2014). Consequences of open-system melting in tectonics. *Journal of the Geological Society, London* **171**, 21–40.
- Yakymchuk, C., Brown, M., Ivanic, T. J. & Korhonen, F. J. (2013a). Leucosome distribution in migmatitic paragneisses and orthogneisses: a record of self-organized melt migration and entrapment in a heterogeneous partially molten crust. *Tectonophysics* **603**, 136–154.
- Yakymchuk, C., Siddoway, C. S., Fanning, C. M., McFadden, R., Korhonen, F. J. & Brown, M. (2013b). Anatectic reworking and differentiation of continental crust along the active margin of Gondwana: a zircon Hf–O perspective from West Antarctica. In: Harley, S. L., Fitzsimons, I. C. W. & Zhao, Y. (eds) *Antarctica and Supercontinent Evolution. Geological Society, London, Special Publications* **383**, 169–210.
- Yakymchuk, C., Brown, M., Brown, C., Siddoway, C. S. & Fanning, C. M. (2015a). Paleozoic evolution of western Marie Byrd Land, Antarctica. *Geological Society of America Bulletin* **127**, 1464–1484.
- Yakymchuk, C., Brown, M., Clark, C., Korhonen, F. J., Piccoli, P. M., Siddoway, C. S., Taylor, R. J. M. & Vervoort, J. D. (2015b). Decoding polyphase migmatites using geochronology and phase equilibria modelling. *Journal of Metamorphic Geology* **33**, 203–230.
- Zeng, L., Asimow, P. D. & Saleeby, J. B. (2005a). Coupling of anatectic reactions and dissolution of accessory phases and the Sr and Nd isotope systematics of anatectic melts from a metasedimentary source. *Geochimica et Cosmochimica Acta* **69**, 3671–3682.
- Zeng, L., Saleeby, J. B. & Asimow, P. (2005b). Nd isotope disequilibrium during crustal anatexis: A record from the Goat Ranch migmatite complex, southern Sierra Nevada batholith, California. *Geology* **33**, 53–56.
- Zeng, L., Saleeby, J. B. & Ducea, M. (2005c). Geochemical characteristics of crustal anatexis during the formation of migmatite at the Southern Sierra Nevada, California. *Contributions to Mineralogy and Petrology* **150**, 386–402.
